# Supplementary material for: Bacterial Communities in the Alpaca Gastrointestinal Tract Vary With Diet and Body Site
Source: Front Microbiol. 2019 Jan 18;9:3334. doi: 10.3389/fmicb.2018.03334 (PMC6345687; doi:10.3389/fmicb.2018.03334)
Supplement: Supplementary file 10 [file Table_1.XLSX]

## Sheet: Table_S1
Table S1. Grain supplement treatment order. Four alpacas (MGH1 – MGH4) fed on mixed grass hay were administered a series of consecutive 2-week supplement treatments (amaranth, barley, quinoa, soybean meal, and no supplement). The treatments were assigned in a random order and no alpaca was administered the same treatment twice.
	2014-09-20	2014-10-04	2014-10-18	2014-11-01	2014-11-15
MGH1	No supplement	Amaranth	Barley	Quinoa	Soybean meal
MGH2	Amaranth	Soybean meal	Quinoa	No supplement	Barley
MGH3	Barley	No supplement	Soybean meal	Quinoa	Amaranth
MGH4	Quinoa	Barley	Amaranth	Soybean meal	No supplement
