# Supplementary material for: Bacterial Communities in the Alpaca Gastrointestinal Tract Vary With Diet and Body Site
Source: Front Microbiol. 2019 Jan 18;9:3334. doi: 10.3389/fmicb.2018.03334 (PMC6345687; doi:10.3389/fmicb.2018.03334)
Supplement: Supplementary file 11 [file Table_2.XLSX]

## Sheet: Table_S2
Table S2. Primer/barcode combinations. DNA was amplified using a dual-barcode system as described in Kozich, et al, 2013.
Illumina Run 1: Forage Diet Experiment
#SampleID	LongName	LinkerPrimerSequence	FirstPrimer	FirstBarcode	FirstPad	FirstLink	First16sfsr	SecondPrimer	SecondBarcode	SecondPad	SecondLink	Second16sfsr	diet	bodysite	individual
A1C1	Alfalfa_C1_1	TATGGTAATTGTGTGCCAGCMGCCGCGGTAAAGTCAGTCAGCCGGACTACHVGGGTWTCTAAT	SA506	CGTGAGTG	TATGGTAATT	GT	GTGCCAGCMGCCGCGGTAA	SB706	CTCGTTAC	AGTCAGTCAG	CC	GGACTACHVGGGTWTCTAAT	alfalfa	c1	1
A1C1Liq	Alfalfa_C1_liquid_1	TATGGTAATTGTGTGCCAGCMGCCGCGGTAAAGTCAGTCAGCCGGACTACHVGGGTWTCTAAT	SA501	ATCGTACG	TATGGTAATT	GT	GTGCCAGCMGCCGCGGTAA	SB702	ATACTTCG	AGTCAGTCAG	CC	GGACTACHVGGGTWTCTAAT	alfalfa	c1 liquid	1
A1Cec	Alfalfa_Cecum_1	TATGGTAATTGTGTGCCAGCMGCCGCGGTAAAGTCAGTCAGCCGGACTACHVGGGTWTCTAAT	SA504	CTGCGTGT	TATGGTAATT	GT	GTGCCAGCMGCCGCGGTAA	SB705	CGTAGATC	AGTCAGTCAG	CC	GGACTACHVGGGTWTCTAAT	alfalfa	cecum	1
A1Duo	Alfalfa_Duodenum_1	TATGGTAATTGTGTGCCAGCMGCCGCGGTAAAGTCAGTCAGCCGGACTACHVGGGTWTCTAAT	SA503	TAGCGAGT	TATGGTAATT	GT	GTGCCAGCMGCCGCGGTAA	SA709	GTCGTAGT	AGTCAGTCAG	CC	GGACTACHVGGGTWTCTAAT	alfalfa	duodenum	1
A1Ileum	Alfalfa_Ileum_1	TATGGTAATTGTGTGCCAGCMGCCGCGGTAAAGTCAGTCAGCCGGACTACHVGGGTWTCTAAT	SA507	GGATATCT	TATGGTAATT	GT	GTGCCAGCMGCCGCGGTAA	SA710	TAGCAGAC	AGTCAGTCAG	CC	GGACTACHVGGGTWTCTAAT	alfalfa	ileum	1
A1Jej	Alfalfa_Jejunum_1	TATGGTAATTGTGTGCCAGCMGCCGCGGTAAAGTCAGTCAGCCGGACTACHVGGGTWTCTAAT	SA504	CTGCGTGT	TATGGTAATT	GT	GTGCCAGCMGCCGCGGTAA	SA709	GTCGTAGT	AGTCAGTCAG	CC	GGACTACHVGGGTWTCTAAT	alfalfa	jejunum	1
A1LI	Alfalfa_LargeIntestine_1	TATGGTAATTGTGTGCCAGCMGCCGCGGTAAAGTCAGTCAGCCGGACTACHVGGGTWTCTAAT	SA507	GGATATCT	TATGGTAATT	GT	GTGCCAGCMGCCGCGGTAA	SB704	CATAGAGA	AGTCAGTCAG	CC	GGACTACHVGGGTWTCTAAT	alfalfa	li	1
A2C1	Alfalfa_C1_liquid_2	TATGGTAATTGTGTGCCAGCMGCCGCGGTAAAGTCAGTCAGCCGGACTACHVGGGTWTCTAAT	SA501	ATCGTACG	TATGGTAATT	GT	GTGCCAGCMGCCGCGGTAA	SA710	TAGCAGAC	AGTCAGTCAG	CC	GGACTACHVGGGTWTCTAAT	alfalfa	c1 liquid	2
A2C1	Alfalfa_C1_2	TATGGTAATTGTGTGCCAGCMGCCGCGGTAAAGTCAGTCAGCCGGACTACHVGGGTWTCTAAT	SA508	GACACCGT	TATGGTAATT	GT	GTGCCAGCMGCCGCGGTAA	SB703	AGCTGCTA	AGTCAGTCAG	CC	GGACTACHVGGGTWTCTAAT	alfalfa	c1	2
A2Cec	Alfalfa_Cecum_2	TATGGTAATTGTGTGCCAGCMGCCGCGGTAAAGTCAGTCAGCCGGACTACHVGGGTWTCTAAT	SA505	TCATCGAG	TATGGTAATT	GT	GTGCCAGCMGCCGCGGTAA	SA711	TCATAGAC	AGTCAGTCAG	CC	GGACTACHVGGGTWTCTAAT	alfalfa	cecum	2
A2Duo	Alfalfa_Duodenum_2	TATGGTAATTGTGTGCCAGCMGCCGCGGTAAAGTCAGTCAGCCGGACTACHVGGGTWTCTAAT	SA508	GACACCGT	TATGGTAATT	GT	GTGCCAGCMGCCGCGGTAA	SA710	TAGCAGAC	AGTCAGTCAG	CC	GGACTACHVGGGTWTCTAAT	alfalfa	duodenum	2
A2Ileum	Alfalfa_Ileum_2	TATGGTAATTGTGTGCCAGCMGCCGCGGTAAAGTCAGTCAGCCGGACTACHVGGGTWTCTAAT	SA503	TAGCGAGT	TATGGTAATT	GT	GTGCCAGCMGCCGCGGTAA	SB701	AAGTCGAG	AGTCAGTCAG	CC	GGACTACHVGGGTWTCTAAT	alfalfa	ileum	2
A2Jej	Alfalfa_Jejunum_2	TATGGTAATTGTGTGCCAGCMGCCGCGGTAAAGTCAGTCAGCCGGACTACHVGGGTWTCTAAT	SA503	TAGCGAGT	TATGGTAATT	GT	GTGCCAGCMGCCGCGGTAA	SB704	CATAGAGA	AGTCAGTCAG	CC	GGACTACHVGGGTWTCTAAT	alfalfa	jejunum	2
A2LI	Alfalfa_LargeIntestine_2	TATGGTAATTGTGTGCCAGCMGCCGCGGTAAAGTCAGTCAGCCGGACTACHVGGGTWTCTAAT	SA504	CTGCGTGT	TATGGTAATT	GT	GTGCCAGCMGCCGCGGTAA	SA710	TAGCAGAC	AGTCAGTCAG	CC	GGACTACHVGGGTWTCTAAT	alfalfa	li	2
A3C1	Alfalfa_C1_3	TATGGTAATTGTGTGCCAGCMGCCGCGGTAAAGTCAGTCAGCCGGACTACHVGGGTWTCTAAT	SA507	GGATATCT	TATGGTAATT	GT	GTGCCAGCMGCCGCGGTAA	SB703	AGCTGCTA	AGTCAGTCAG	CC	GGACTACHVGGGTWTCTAAT	alfalfa	c1	3
A3C1Liq	Alfalfa_C1_liquid_3	TATGGTAATTGTGTGCCAGCMGCCGCGGTAAAGTCAGTCAGCCGGACTACHVGGGTWTCTAAT	SA504	CTGCGTGT	TATGGTAATT	GT	GTGCCAGCMGCCGCGGTAA	SB702	ATACTTCG	AGTCAGTCAG	CC	GGACTACHVGGGTWTCTAAT	alfalfa	c1 liquid	3
A3Cec	Alfalfa_Cecum_3	TATGGTAATTGTGTGCCAGCMGCCGCGGTAAAGTCAGTCAGCCGGACTACHVGGGTWTCTAAT	SA503	TAGCGAGT	TATGGTAATT	GT	GTGCCAGCMGCCGCGGTAA	SA710	TAGCAGAC	AGTCAGTCAG	CC	GGACTACHVGGGTWTCTAAT	alfalfa	cecum	3
A3Duo	Alfalfa_Duodenum_3	TATGGTAATTGTGTGCCAGCMGCCGCGGTAAAGTCAGTCAGCCGGACTACHVGGGTWTCTAAT	SA506	CGTGAGTG	TATGGTAATT	GT	GTGCCAGCMGCCGCGGTAA	SA709	GTCGTAGT	AGTCAGTCAG	CC	GGACTACHVGGGTWTCTAAT	alfalfa	duodenum	3
A3Ileum	Alfalfa_Ileum_3	TATGGTAATTGTGTGCCAGCMGCCGCGGTAAAGTCAGTCAGCCGGACTACHVGGGTWTCTAAT	SA508	GACACCGT	TATGGTAATT	GT	GTGCCAGCMGCCGCGGTAA	SA711	TCATAGAC	AGTCAGTCAG	CC	GGACTACHVGGGTWTCTAAT	alfalfa	ileum	3
A3Jej	Alfalfa_Jejunum_3	TATGGTAATTGTGTGCCAGCMGCCGCGGTAAAGTCAGTCAGCCGGACTACHVGGGTWTCTAAT	SA506	CGTGAGTG	TATGGTAATT	GT	GTGCCAGCMGCCGCGGTAA	SA711	TCATAGAC	AGTCAGTCAG	CC	GGACTACHVGGGTWTCTAAT	alfalfa	jejunum	3
A3LI	Alfalfa_LargeIntestine_3	TATGGTAATTGTGTGCCAGCMGCCGCGGTAAAGTCAGTCAGCCGGACTACHVGGGTWTCTAAT	SA502	ACTATCTG	TATGGTAATT	GT	GTGCCAGCMGCCGCGGTAA	SB703	AGCTGCTA	AGTCAGTCAG	CC	GGACTACHVGGGTWTCTAAT	alfalfa	li	3
A4C1	Alfalfa_C1_4	TATGGTAATTGTGTGCCAGCMGCCGCGGTAAAGTCAGTCAGCCGGACTACHVGGGTWTCTAAT	SA507	GGATATCT	TATGGTAATT	GT	GTGCCAGCMGCCGCGGTAA	SB707	GCGCACGT	AGTCAGTCAG	CC	GGACTACHVGGGTWTCTAAT	alfalfa	c1	4
A4Cec	Alfalfa_Cecum_4	TATGGTAATTGTGTGCCAGCMGCCGCGGTAAAGTCAGTCAGCCGGACTACHVGGGTWTCTAAT	SA507	GGATATCT	TATGGTAATT	GT	GTGCCAGCMGCCGCGGTAA	SB706	CTCGTTAC	AGTCAGTCAG	CC	GGACTACHVGGGTWTCTAAT	alfalfa	cecum	4
A4Duo	Alfalfa_Duodenum_4	TATGGTAATTGTGTGCCAGCMGCCGCGGTAAAGTCAGTCAGCCGGACTACHVGGGTWTCTAAT	SA505	TCATCGAG	TATGGTAATT	GT	GTGCCAGCMGCCGCGGTAA	SB702	ATACTTCG	AGTCAGTCAG	CC	GGACTACHVGGGTWTCTAAT	alfalfa	duodenum	4
A4Ileum	Alfalfa_Ileum_4	TATGGTAATTGTGTGCCAGCMGCCGCGGTAAAGTCAGTCAGCCGGACTACHVGGGTWTCTAAT	SA507	GGATATCT	TATGGTAATT	GT	GTGCCAGCMGCCGCGGTAA	SB702	ATACTTCG	AGTCAGTCAG	CC	GGACTACHVGGGTWTCTAAT	alfalfa	ileum	4
A4Jej	Alfalfa_Jejunum_4	TATGGTAATTGTGTGCCAGCMGCCGCGGTAAAGTCAGTCAGCCGGACTACHVGGGTWTCTAAT	SA506	CGTGAGTG	TATGGTAATT	GT	GTGCCAGCMGCCGCGGTAA	SA710	TAGCAGAC	AGTCAGTCAG	CC	GGACTACHVGGGTWTCTAAT	alfalfa	jejunum	4
A4LI	Alfalfa_LargeIntestine_4	TATGGTAATTGTGTGCCAGCMGCCGCGGTAAAGTCAGTCAGCCGGACTACHVGGGTWTCTAAT	SA506	CGTGAGTG	TATGGTAATT	GT	GTGCCAGCMGCCGCGGTAA	SA712	TCGCTATA	AGTCAGTCAG	CC	GGACTACHVGGGTWTCTAAT	alfalfa	li	4
A5C1	Alfalfa_C1_5	TATGGTAATTGTGTGCCAGCMGCCGCGGTAAAGTCAGTCAGCCGGACTACHVGGGTWTCTAAT	SA501	ATCGTACG	TATGGTAATT	GT	GTGCCAGCMGCCGCGGTAA	SB705	CGTAGATC	AGTCAGTCAG	CC	GGACTACHVGGGTWTCTAAT	alfalfa	c1	5
A5Cec	Alfalfa_Cecum_5	TATGGTAATTGTGTGCCAGCMGCCGCGGTAAAGTCAGTCAGCCGGACTACHVGGGTWTCTAAT	SA504	CTGCGTGT	TATGGTAATT	GT	GTGCCAGCMGCCGCGGTAA	SB703	AGCTGCTA	AGTCAGTCAG	CC	GGACTACHVGGGTWTCTAAT	alfalfa	cecum	5
A5Duo	Alfalfa_Duodenum_5	TATGGTAATTGTGTGCCAGCMGCCGCGGTAAAGTCAGTCAGCCGGACTACHVGGGTWTCTAAT	SA505	TCATCGAG	TATGGTAATT	GT	GTGCCAGCMGCCGCGGTAA	SA712	TCGCTATA	AGTCAGTCAG	CC	GGACTACHVGGGTWTCTAAT	alfalfa	duodenum	5
A5Ileum	Alfalfa_Ileum_5	TATGGTAATTGTGTGCCAGCMGCCGCGGTAAAGTCAGTCAGCCGGACTACHVGGGTWTCTAAT	SA501	ATCGTACG	TATGGTAATT	GT	GTGCCAGCMGCCGCGGTAA	SB701	AAGTCGAG	AGTCAGTCAG	CC	GGACTACHVGGGTWTCTAAT	alfalfa	ileum	5
A5Jej	Alfalfa_Jejunum_5	TATGGTAATTGTGTGCCAGCMGCCGCGGTAAAGTCAGTCAGCCGGACTACHVGGGTWTCTAAT	SA502	ACTATCTG	TATGGTAATT	GT	GTGCCAGCMGCCGCGGTAA	SA711	TCATAGAC	AGTCAGTCAG	CC	GGACTACHVGGGTWTCTAAT	alfalfa	jejunum	5
A5LI	Alfalfa_LargeIntestine_5	TATGGTAATTGTGTGCCAGCMGCCGCGGTAAAGTCAGTCAGCCGGACTACHVGGGTWTCTAAT	SA507	GGATATCT	TATGGTAATT	GT	GTGCCAGCMGCCGCGGTAA	SA708	GTCGCTCG	AGTCAGTCAG	CC	GGACTACHVGGGTWTCTAAT	alfalfa	li	5
G1C1Liq	Grass_C1_liquid_1	TATGGTAATTGTGTGCCAGCMGCCGCGGTAAAGTCAGTCAGCCGGACTACHVGGGTWTCTAAT	SA502	ACTATCTG	TATGGTAATT	GT	GTGCCAGCMGCCGCGGTAA	SA712	TCGCTATA	AGTCAGTCAG	CC	GGACTACHVGGGTWTCTAAT	grass	c1 liquid	6
G1C1	Grass_C1_1	TATGGTAATTGTGTGCCAGCMGCCGCGGTAAAGTCAGTCAGCCGGACTACHVGGGTWTCTAAT	SA503	TAGCGAGT	TATGGTAATT	GT	GTGCCAGCMGCCGCGGTAA	SB705	CGTAGATC	AGTCAGTCAG	CC	GGACTACHVGGGTWTCTAAT	grass	c1	6
G1Cec	Grass_Cecum_1	TATGGTAATTGTGTGCCAGCMGCCGCGGTAAAGTCAGTCAGCCGGACTACHVGGGTWTCTAAT	SA508	GACACCGT	TATGGTAATT	GT	GTGCCAGCMGCCGCGGTAA	SB704	CATAGAGA	AGTCAGTCAG	CC	GGACTACHVGGGTWTCTAAT	grass	cecum	6
G1Duo	Grass_Duodenum_1	TATGGTAATTGTGTGCCAGCMGCCGCGGTAAAGTCAGTCAGCCGGACTACHVGGGTWTCTAAT	SA502	ACTATCTG	TATGGTAATT	GT	GTGCCAGCMGCCGCGGTAA	SB702	ATACTTCG	AGTCAGTCAG	CC	GGACTACHVGGGTWTCTAAT	grass	duodenum	6
G1Ileum	Grass_Ileum_1	TATGGTAATTGTGTGCCAGCMGCCGCGGTAAAGTCAGTCAGCCGGACTACHVGGGTWTCTAAT	SA501	ATCGTACG	TATGGTAATT	GT	GTGCCAGCMGCCGCGGTAA	SA711	TCATAGAC	AGTCAGTCAG	CC	GGACTACHVGGGTWTCTAAT	grass	ileum	6
G1Jej	Grass_Jejunum_1	TATGGTAATTGTGTGCCAGCMGCCGCGGTAAAGTCAGTCAGCCGGACTACHVGGGTWTCTAAT	SA507	GGATATCT	TATGGTAATT	GT	GTGCCAGCMGCCGCGGTAA	SA709	GTCGTAGT	AGTCAGTCAG	CC	GGACTACHVGGGTWTCTAAT	grass	jejunum	6
G1LI	Grass_LargeIntestine_1	TATGGTAATTGTGTGCCAGCMGCCGCGGTAAAGTCAGTCAGCCGGACTACHVGGGTWTCTAAT	SA504	CTGCGTGT	TATGGTAATT	GT	GTGCCAGCMGCCGCGGTAA	SB704	CATAGAGA	AGTCAGTCAG	CC	GGACTACHVGGGTWTCTAAT	grass	li	6
G2C1Liq	Grass_C1_liquid_2	TATGGTAATTGTGTGCCAGCMGCCGCGGTAAAGTCAGTCAGCCGGACTACHVGGGTWTCTAAT	SA502	ACTATCTG	TATGGTAATT	GT	GTGCCAGCMGCCGCGGTAA	SB701	AAGTCGAG	AGTCAGTCAG	CC	GGACTACHVGGGTWTCTAAT	grass	c1 liquid	7
G2C1	Grass_C1_2	TATGGTAATTGTGTGCCAGCMGCCGCGGTAAAGTCAGTCAGCCGGACTACHVGGGTWTCTAAT	SA508	GACACCGT	TATGGTAATT	GT	GTGCCAGCMGCCGCGGTAA	SB707	GCGCACGT	AGTCAGTCAG	CC	GGACTACHVGGGTWTCTAAT	grass	c1	7
G2Cec	Grass_Cecum_2	TATGGTAATTGTGTGCCAGCMGCCGCGGTAAAGTCAGTCAGCCGGACTACHVGGGTWTCTAAT	SA501	ATCGTACG	TATGGTAATT	GT	GTGCCAGCMGCCGCGGTAA	SB703	AGCTGCTA	AGTCAGTCAG	CC	GGACTACHVGGGTWTCTAAT	grass	cecum	7
G2Duo	Grass_Duodenum_2	TATGGTAATTGTGTGCCAGCMGCCGCGGTAAAGTCAGTCAGCCGGACTACHVGGGTWTCTAAT	SA504	CTGCGTGT	TATGGTAATT	GT	GTGCCAGCMGCCGCGGTAA	SA712	TCGCTATA	AGTCAGTCAG	CC	GGACTACHVGGGTWTCTAAT	grass	duodenum	7
G2Ileum	Grass_Ileum_2	TATGGTAATTGTGTGCCAGCMGCCGCGGTAAAGTCAGTCAGCCGGACTACHVGGGTWTCTAAT	SA505	TCATCGAG	TATGGTAATT	GT	GTGCCAGCMGCCGCGGTAA	SB704	CATAGAGA	AGTCAGTCAG	CC	GGACTACHVGGGTWTCTAAT	grass	ileum	7
G2Jej	Grass_Jejunum_2	TATGGTAATTGTGTGCCAGCMGCCGCGGTAAAGTCAGTCAGCCGGACTACHVGGGTWTCTAAT	SA505	TCATCGAG	TATGGTAATT	GT	GTGCCAGCMGCCGCGGTAA	SB701	AAGTCGAG	AGTCAGTCAG	CC	GGACTACHVGGGTWTCTAAT	grass	jejunum	7
G2LI	Grass_LargeIntestine_2	TATGGTAATTGTGTGCCAGCMGCCGCGGTAAAGTCAGTCAGCCGGACTACHVGGGTWTCTAAT	SA506	CGTGAGTG	TATGGTAATT	GT	GTGCCAGCMGCCGCGGTAA	SB704	CATAGAGA	AGTCAGTCAG	CC	GGACTACHVGGGTWTCTAAT	grass	li	7
G3/5C1a	Grass_C1_3or5	TATGGTAATTGTGTGCCAGCMGCCGCGGTAAAGTCAGTCAGCCGGACTACHVGGGTWTCTAAT	SA503	TAGCGAGT	TATGGTAATT	GT	GTGCCAGCMGCCGCGGTAA	SB703	AGCTGCTA	AGTCAGTCAG	CC	GGACTACHVGGGTWTCTAAT	grass	c1	8 or 10
G3/5C1b	Grass_C1_3or5	TATGGTAATTGTGTGCCAGCMGCCGCGGTAAAGTCAGTCAGCCGGACTACHVGGGTWTCTAAT	SA502	ACTATCTG	TATGGTAATT	GT	GTGCCAGCMGCCGCGGTAA	SB705	CGTAGATC	AGTCAGTCAG	CC	GGACTACHVGGGTWTCTAAT	grass	c1	8 or 10
G3C1Liq	Grass_C1_liquid_3	TATGGTAATTGTGTGCCAGCMGCCGCGGTAAAGTCAGTCAGCCGGACTACHVGGGTWTCTAAT	SA508	GACACCGT	TATGGTAATT	GT	GTGCCAGCMGCCGCGGTAA	SB701	AAGTCGAG	AGTCAGTCAG	CC	GGACTACHVGGGTWTCTAAT	grass	c1	8
G3Cec	Grass_Cecum_3	TATGGTAATTGTGTGCCAGCMGCCGCGGTAAAGTCAGTCAGCCGGACTACHVGGGTWTCTAAT	SA505	TCATCGAG	TATGGTAATT	GT	GTGCCAGCMGCCGCGGTAA	SB703	AGCTGCTA	AGTCAGTCAG	CC	GGACTACHVGGGTWTCTAAT	grass	cecum	8
G3Duo	Grass_Duodenum_3	TATGGTAATTGTGTGCCAGCMGCCGCGGTAAAGTCAGTCAGCCGGACTACHVGGGTWTCTAAT	SA502	ACTATCTG	TATGGTAATT	GT	GTGCCAGCMGCCGCGGTAA	SA709	GTCGTAGT	AGTCAGTCAG	CC	GGACTACHVGGGTWTCTAAT	grass	duodenum	8
G3Ileum	Grass_Ileum_3	TATGGTAATTGTGTGCCAGCMGCCGCGGTAAAGTCAGTCAGCCGGACTACHVGGGTWTCTAAT	SA504	CTGCGTGT	TATGGTAATT	GT	GTGCCAGCMGCCGCGGTAA	SA711	TCATAGAC	AGTCAGTCAG	CC	GGACTACHVGGGTWTCTAAT	grass	ileum	8
G3Jej	Grass_Jejunum_3	TATGGTAATTGTGTGCCAGCMGCCGCGGTAAAGTCAGTCAGCCGGACTACHVGGGTWTCTAAT	SA502	ACTATCTG	TATGGTAATT	GT	GTGCCAGCMGCCGCGGTAA	SA710	TAGCAGAC	AGTCAGTCAG	CC	GGACTACHVGGGTWTCTAAT	grass	jejunum	8
G3LI	Grass_LargeIntestine_3	TATGGTAATTGTGTGCCAGCMGCCGCGGTAAAGTCAGTCAGCCGGACTACHVGGGTWTCTAAT	SA506	CGTGAGTG	TATGGTAATT	GT	GTGCCAGCMGCCGCGGTAA	SA708	GTCGCTCG	AGTCAGTCAG	CC	GGACTACHVGGGTWTCTAAT	grass	li	8
G4C1Liq	Grass_C1_liquid_4	TATGGTAATTGTGTGCCAGCMGCCGCGGTAAAGTCAGTCAGCCGGACTACHVGGGTWTCTAAT	SA506	CGTGAGTG	TATGGTAATT	GT	GTGCCAGCMGCCGCGGTAA	SB702	ATACTTCG	AGTCAGTCAG	CC	GGACTACHVGGGTWTCTAAT	grass	c1 liquid	9
G4C1	Grass_C1_4	TATGGTAATTGTGTGCCAGCMGCCGCGGTAAAGTCAGTCAGCCGGACTACHVGGGTWTCTAAT	SA506	CGTGAGTG	TATGGTAATT	GT	GTGCCAGCMGCCGCGGTAA	SB703	AGCTGCTA	AGTCAGTCAG	CC	GGACTACHVGGGTWTCTAAT	grass	c1	9
G4Cec	Grass_Cecum_4	TATGGTAATTGTGTGCCAGCMGCCGCGGTAAAGTCAGTCAGCCGGACTACHVGGGTWTCTAAT	SA504	CTGCGTGT	TATGGTAATT	GT	GTGCCAGCMGCCGCGGTAA	SB701	AAGTCGAG	AGTCAGTCAG	CC	GGACTACHVGGGTWTCTAAT	grass	cecum	9
G4Duo	Grass_Duodenum_4	TATGGTAATTGTGTGCCAGCMGCCGCGGTAAAGTCAGTCAGCCGGACTACHVGGGTWTCTAAT	SA505	TCATCGAG	TATGGTAATT	GT	GTGCCAGCMGCCGCGGTAA	SA710	TAGCAGAC	AGTCAGTCAG	CC	GGACTACHVGGGTWTCTAAT	grass	duodenum	9
G4Ileum	Grass_Ileum_4	TATGGTAATTGTGTGCCAGCMGCCGCGGTAAAGTCAGTCAGCCGGACTACHVGGGTWTCTAAT	SA507	GGATATCT	TATGGTAATT	GT	GTGCCAGCMGCCGCGGTAA	SB701	AAGTCGAG	AGTCAGTCAG	CC	GGACTACHVGGGTWTCTAAT	grass	ileum	9
G4Jej	Grass_Jejunum_4	TATGGTAATTGTGTGCCAGCMGCCGCGGTAAAGTCAGTCAGCCGGACTACHVGGGTWTCTAAT	SA501	ATCGTACG	TATGGTAATT	GT	GTGCCAGCMGCCGCGGTAA	SA712	TCGCTATA	AGTCAGTCAG	CC	GGACTACHVGGGTWTCTAAT	grass	jejunum	9
G4LI	Grass_LargeIntestine_4	TATGGTAATTGTGTGCCAGCMGCCGCGGTAAAGTCAGTCAGCCGGACTACHVGGGTWTCTAAT	SA501	ATCGTACG	TATGGTAATT	GT	GTGCCAGCMGCCGCGGTAA	SB704	CATAGAGA	AGTCAGTCAG	CC	GGACTACHVGGGTWTCTAAT	grass	li	9
G5C1Liq	Grass_C1_liquid_5	TATGGTAATTGTGTGCCAGCMGCCGCGGTAAAGTCAGTCAGCCGGACTACHVGGGTWTCTAAT	SA503	TAGCGAGT	TATGGTAATT	GT	GTGCCAGCMGCCGCGGTAA	SB702	ATACTTCG	AGTCAGTCAG	CC	GGACTACHVGGGTWTCTAAT	grass	c1 liquid	10
G5Cec	Grass_Cecum_5	TATGGTAATTGTGTGCCAGCMGCCGCGGTAAAGTCAGTCAGCCGGACTACHVGGGTWTCTAAT	SA507	GGATATCT	TATGGTAATT	GT	GTGCCAGCMGCCGCGGTAA	SA712	TCGCTATA	AGTCAGTCAG	CC	GGACTACHVGGGTWTCTAAT	grass	cecum	10
G5Duo	Grass_Duodenum_5	TATGGTAATTGTGTGCCAGCMGCCGCGGTAAAGTCAGTCAGCCGGACTACHVGGGTWTCTAAT	SA505	TCATCGAG	TATGGTAATT	GT	GTGCCAGCMGCCGCGGTAA	SA709	GTCGTAGT	AGTCAGTCAG	CC	GGACTACHVGGGTWTCTAAT	grass	duodeum	10
G5Ileum	Grass_Ileum_5	TATGGTAATTGTGTGCCAGCMGCCGCGGTAAAGTCAGTCAGCCGGACTACHVGGGTWTCTAAT	SA507	GGATATCT	TATGGTAATT	GT	GTGCCAGCMGCCGCGGTAA	SA711	TCATAGAC	AGTCAGTCAG	CC	GGACTACHVGGGTWTCTAAT	grass	ileum	10
G5Jej	Grass_Jejunum_5	TATGGTAATTGTGTGCCAGCMGCCGCGGTAAAGTCAGTCAGCCGGACTACHVGGGTWTCTAAT	SA501	ATCGTACG	TATGGTAATT	GT	GTGCCAGCMGCCGCGGTAA	SA709	GTCGTAGT	AGTCAGTCAG	CC	GGACTACHVGGGTWTCTAAT	grass	jejunum	10
G5LI	Grass_LargeIntestine_5	TATGGTAATTGTGTGCCAGCMGCCGCGGTAAAGTCAGTCAGCCGGACTACHVGGGTWTCTAAT	SA508	GACACCGT	TATGGTAATT	GT	GTGCCAGCMGCCGCGGTAA	SA708	GTCGCTCG	AGTCAGTCAG	CC	GGACTACHVGGGTWTCTAAT	grass	li	10
NegativeControl1AG	Negative Control 1	TATGGTAATTGTGTGCCAGCMGCCGCGGTAAAGTCAGTCAGCCGGACTACHVGGGTWTCTAAT	SA508	GACACCGT	TATGGTAATT	GT	GTGCCAGCMGCCGCGGTAA	SA709	GTCGTAGT	AGTCAGTCAG	CC	GGACTACHVGGGTWTCTAAT	NA	NA	NA
NegativeControl2AG	Negative Control 2	TATGGTAATTGTGTGCCAGCMGCCGCGGTAAAGTCAGTCAGCCGGACTACHVGGGTWTCTAAT	SA503	TAGCGAGT	TATGGTAATT	GT	GTGCCAGCMGCCGCGGTAA	SA711	TCATAGAC	AGTCAGTCAG	CC	GGACTACHVGGGTWTCTAAT	NA	NA	NA
NegativeControl3AG	Negative Control 3	TATGGTAATTGTGTGCCAGCMGCCGCGGTAAAGTCAGTCAGCCGGACTACHVGGGTWTCTAAT	SA503	TAGCGAGT	TATGGTAATT	GT	GTGCCAGCMGCCGCGGTAA	SA712	TCGCTATA	AGTCAGTCAG	CC	GGACTACHVGGGTWTCTAAT	NA	NA	NA
NegativeControl4AG	Negative Control 4	TATGGTAATTGTGTGCCAGCMGCCGCGGTAAAGTCAGTCAGCCGGACTACHVGGGTWTCTAAT	SA506	CGTGAGTG	TATGGTAATT	GT	GTGCCAGCMGCCGCGGTAA	SB701	AAGTCGAG	AGTCAGTCAG	CC	GGACTACHVGGGTWTCTAAT	NA	NA	NA
NegativeControl5AG	Negative Control 5	TATGGTAATTGTGTGCCAGCMGCCGCGGTAAAGTCAGTCAGCCGGACTACHVGGGTWTCTAAT	SA508	GACACCGT	TATGGTAATT	GT	GTGCCAGCMGCCGCGGTAA	SB702	ATACTTCG	AGTCAGTCAG	CC	GGACTACHVGGGTWTCTAAT	NA	NA	NA
NegativeControl6AG	Negative Control 6	TATGGTAATTGTGTGCCAGCMGCCGCGGTAAAGTCAGTCAGCCGGACTACHVGGGTWTCTAAT	SA502	ACTATCTG	TATGGTAATT	GT	GTGCCAGCMGCCGCGGTAA	SB704	CATAGAGA	AGTCAGTCAG	CC	GGACTACHVGGGTWTCTAAT	NA	NA	NA
NegativeControl7AG	Negative Control 7	TATGGTAATTGTGTGCCAGCMGCCGCGGTAAAGTCAGTCAGCCGGACTACHVGGGTWTCTAAT	SA508	GACACCGT	TATGGTAATT	GT	GTGCCAGCMGCCGCGGTAA	SA712	TCGCTATA	AGTCAGTCAG	CC	GGACTACHVGGGTWTCTAAT	NA	NA	NA
Diet supplement experiment
#SampleID	LongName	LinkerPrimerSequence	FirstPrimer	FirstBarcode	FirstPad	FirstLink	First16sfsr	SecondPrimer	SecondBarcode	SecondPad	SecondLink	Second16sfsr	supplement	date	body site	individual
MGH1Am	Amaranth1	TATGGTAATTGTGTGCCAGCMGCCGCGGTAAAGTCAGTCAGCCGGACTACHVGGGTWTCTAAT	SA503	TAGCGAGT	TATGGTAATT	GT	GTGCCAGCMGCCGCGGTAA	SB706	CTCGTTAC	AGTCAGTCAG	CC	GGACTACHVGGGTWTCTAAT	Amaranth	10.4.2014	c1 liquid	1T
MGH1B	Barley1	TATGGTAATTGTGTGCCAGCMGCCGCGGTAAAGTCAGTCAGCCGGACTACHVGGGTWTCTAAT	SA503	TAGCGAGT	TATGGTAATT	GT	GTGCCAGCMGCCGCGGTAA	SB708	GGTACTAT	AGTCAGTCAG	CC	GGACTACHVGGGTWTCTAAT	Barley	10.18.2014	c1 liquid	1T
MGH1SBM	SBM1	TATGGTAATTGTGTGCCAGCMGCCGCGGTAAAGTCAGTCAGCCGGACTACHVGGGTWTCTAAT	SA505	TCATCGAG	TATGGTAATT	GT	GTGCCAGCMGCCGCGGTAA	SB708	GGTACTAT	AGTCAGTCAG	CC	GGACTACHVGGGTWTCTAAT	SBM	11.15.2014	c1 liquid	1T
MGH1Q	Quinoa1	TATGGTAATTGTGTGCCAGCMGCCGCGGTAAAGTCAGTCAGCCGGACTACHVGGGTWTCTAAT	SA505	TCATCGAG	TATGGTAATT	GT	GTGCCAGCMGCCGCGGTAA	SB707	GCGCACGT	AGTCAGTCAG	CC	GGACTACHVGGGTWTCTAAT	Quinoa	11.1.2014	c1 liquid	1T
MGH1NoSupp	no supplement 1	TATGGTAATTGTGTGCCAGCMGCCGCGGTAAAGTCAGTCAGCCGGACTACHVGGGTWTCTAAT	SA502	ACTATCTG	TATGGTAATT	GT	GTGCCAGCMGCCGCGGTAA	SB707	GCGCACGT	AGTCAGTCAG	CC	GGACTACHVGGGTWTCTAAT	none	9.20.2014	c1 liquid	1T
MGH2SBM	SBM2	TATGGTAATTGTGTGCCAGCMGCCGCGGTAAAGTCAGTCAGCCGGACTACHVGGGTWTCTAAT	SA503	TAGCGAGT	TATGGTAATT	GT	GTGCCAGCMGCCGCGGTAA	SB707	GCGCACGT	AGTCAGTCAG	CC	GGACTACHVGGGTWTCTAAT	SBM	10.4.2014	c1 liquid	2T
MGH2Q	Quinoa2	TATGGTAATTGTGTGCCAGCMGCCGCGGTAAAGTCAGTCAGCCGGACTACHVGGGTWTCTAAT	SA506	CGTGAGTG	TATGGTAATT	GT	GTGCCAGCMGCCGCGGTAA	SB705	CGTAGATC	AGTCAGTCAG	CC	GGACTACHVGGGTWTCTAAT	Quinoa	10.18.2014	c1 liquid	2T
MGH2B	Barley2	TATGGTAATTGTGTGCCAGCMGCCGCGGTAAAGTCAGTCAGCCGGACTACHVGGGTWTCTAAT	SA508	GACACCGT	TATGGTAATT	GT	GTGCCAGCMGCCGCGGTAA	SB705	CGTAGATC	AGTCAGTCAG	CC	GGACTACHVGGGTWTCTAAT	Barley	11.15.2014	c1 liquid	2T
MGH2NoSupp	no supplement 2	TATGGTAATTGTGTGCCAGCMGCCGCGGTAAAGTCAGTCAGCCGGACTACHVGGGTWTCTAAT	SA501	ATCGTACG	TATGGTAATT	GT	GTGCCAGCMGCCGCGGTAA	SB708	GGTACTAT	AGTCAGTCAG	CC	GGACTACHVGGGTWTCTAAT	none	11.1.2014	c1 liquid	2T
MGH2Am	Amaranth2	TATGGTAATTGTGTGCCAGCMGCCGCGGTAAAGTCAGTCAGCCGGACTACHVGGGTWTCTAAT	SA506	CGTGAGTG	TATGGTAATT	GT	GTGCCAGCMGCCGCGGTAA	SB707	GCGCACGT	AGTCAGTCAG	CC	GGACTACHVGGGTWTCTAAT	Amaranth	9.20.2014	c1 liquid	2T
MGH3NoSupp	no supplement 3	TATGGTAATTGTGTGCCAGCMGCCGCGGTAAAGTCAGTCAGCCGGACTACHVGGGTWTCTAAT	SA504	CTGCGTGT	TATGGTAATT	GT	GTGCCAGCMGCCGCGGTAA	SB706	CTCGTTAC	AGTCAGTCAG	CC	GGACTACHVGGGTWTCTAAT	none	10.4.2014	c1 liquid	3T
MGH3SBM	SBM3	TATGGTAATTGTGTGCCAGCMGCCGCGGTAAAGTCAGTCAGCCGGACTACHVGGGTWTCTAAT	SA501	ATCGTACG	TATGGTAATT	GT	GTGCCAGCMGCCGCGGTAA	SB706	CTCGTTAC	AGTCAGTCAG	CC	GGACTACHVGGGTWTCTAAT	SBM	10.18.2014	c1 liquid	3T
MGH3Am	Amaranth3	TATGGTAATTGTGTGCCAGCMGCCGCGGTAAAGTCAGTCAGCCGGACTACHVGGGTWTCTAAT	SA504	CTGCGTGT	TATGGTAATT	GT	GTGCCAGCMGCCGCGGTAA	SB708	GGTACTAT	AGTCAGTCAG	CC	GGACTACHVGGGTWTCTAAT	Amaranth	11.15.2014	c1 liquid	3T
MGH3Q	Quinoa3	TATGGTAATTGTGTGCCAGCMGCCGCGGTAAAGTCAGTCAGCCGGACTACHVGGGTWTCTAAT	SA508	GACACCGT	TATGGTAATT	GT	GTGCCAGCMGCCGCGGTAA	SB706	CTCGTTAC	AGTCAGTCAG	CC	GGACTACHVGGGTWTCTAAT	Quinoa	11.1.2014	c1 liquid	3T
MGH3B	Barley3	TATGGTAATTGTGTGCCAGCMGCCGCGGTAAAGTCAGTCAGCCGGACTACHVGGGTWTCTAAT	SA501	ATCGTACG	TATGGTAATT	GT	GTGCCAGCMGCCGCGGTAA	SB707	GCGCACGT	AGTCAGTCAG	CC	GGACTACHVGGGTWTCTAAT	Barley	9.20.2014	c1 liquid	3T
MGH4B	Barley4	TATGGTAATTGTGTGCCAGCMGCCGCGGTAAAGTCAGTCAGCCGGACTACHVGGGTWTCTAAT	SA507	GGATATCT	TATGGTAATT	GT	GTGCCAGCMGCCGCGGTAA	SB705	CGTAGATC	AGTCAGTCAG	CC	GGACTACHVGGGTWTCTAAT	Barley	10.4.2014	c1 liquid	4T
MGH4Am	Amaranth4	TATGGTAATTGTGTGCCAGCMGCCGCGGTAAAGTCAGTCAGCCGGACTACHVGGGTWTCTAAT	SA502	ACTATCTG	TATGGTAATT	GT	GTGCCAGCMGCCGCGGTAA	SB708	GGTACTAT	AGTCAGTCAG	CC	GGACTACHVGGGTWTCTAAT	Amaranth	10.18.2014	c1 liquid	4T
MGH4NoSupp	no supplement 4	TATGGTAATTGTGTGCCAGCMGCCGCGGTAAAGTCAGTCAGCCGGACTACHVGGGTWTCTAAT	SA505	TCATCGAG	TATGGTAATT	GT	GTGCCAGCMGCCGCGGTAA	SB705	CGTAGATC	AGTCAGTCAG	CC	GGACTACHVGGGTWTCTAAT	none	11.15.2014	c1 liquid	4T
MGH4SBM	SBM4	TATGGTAATTGTGTGCCAGCMGCCGCGGTAAAGTCAGTCAGCCGGACTACHVGGGTWTCTAAT	SA504	CTGCGTGT	TATGGTAATT	GT	GTGCCAGCMGCCGCGGTAA	SB707	GCGCACGT	AGTCAGTCAG	CC	GGACTACHVGGGTWTCTAAT	SBM	11.1.2014	c1 liquid	4T
MGH4Q	Quinoa4	TATGGTAATTGTGTGCCAGCMGCCGCGGTAAAGTCAGTCAGCCGGACTACHVGGGTWTCTAAT	SA502	ACTATCTG	TATGGTAATT	GT	GTGCCAGCMGCCGCGGTAA	SB706	CTCGTTAC	AGTCAGTCAG	CC	GGACTACHVGGGTWTCTAAT	Quinoa	9.20.2014	c1 liquid	4T
NegativeControlMGH	Negative Control 8	TATGGTAATTGTGTGCCAGCMGCCGCGGTAAAGTCAGTCAGCCGGACTACHVGGGTWTCTAAT	SA505	TCATCGAG	TATGGTAATT	GT	GTGCCAGCMGCCGCGGTAA	SB706	CTCGTTAC	AGTCAGTCAG	CC	GGACTACHVGGGTWTCTAAT	NA	NA	NA	NA
Illumina Run 2: GBC/LBC Alpacas
#SampleID	LongName	LinkerPrimerSequence	FirstPrimer	FirstBarcode	FirstPad	FirstLink	First16sfsr	SecondPrimer	SecondBarcode	SecondPad	SecondLink	Second16sfsr	BCS	Low_Good
Good5	Good body condition 5	TATGGTAATTGTGTGCCAGCMGCCGCGGTAAAGTCAGTCAGCCGGACTACHVGGGTWTCTAAT	SD712	TGCGTCAA	TATGGTAATT	GT	GTGCCAGCMGCCGCGGTAA	SC504	CTAGAGCT	AGTCAGTCAG	CC	GGACTACHVGGGTWTCTAAT	4	Good
Low7	Low body condition 7	TATGGTAATTGTGTGCCAGCMGCCGCGGTAAAGTCAGTCAGCCGGACTACHVGGGTWTCTAAT	SD712	TGCGTCAA	TATGGTAATT	GT	GTGCCAGCMGCCGCGGTAA	SC505	GCTCTAGT	AGTCAGTCAG	CC	GGACTACHVGGGTWTCTAAT	2	Low
Low8	Low body condition 8	TATGGTAATTGTGTGCCAGCMGCCGCGGTAAAGTCAGTCAGCCGGACTACHVGGGTWTCTAAT	SD712	TGCGTCAA	TATGGTAATT	GT	GTGCCAGCMGCCGCGGTAA	SC506	GACACTGA	AGTCAGTCAG	CC	GGACTACHVGGGTWTCTAAT	2minus	Low
Low9	Low body condition 9	TATGGTAATTGTGTGCCAGCMGCCGCGGTAAAGTCAGTCAGCCGGACTACHVGGGTWTCTAAT	SD712	TGCGTCAA	TATGGTAATT	GT	GTGCCAGCMGCCGCGGTAA	SC507	TGCGTACG	AGTCAGTCAG	CC	GGACTACHVGGGTWTCTAAT	2plus	Low
Low10	Low body condition 10	TATGGTAATTGTGTGCCAGCMGCCGCGGTAAAGTCAGTCAGCCGGACTACHVGGGTWTCTAAT	SD712	TGCGTCAA	TATGGTAATT	GT	GTGCCAGCMGCCGCGGTAA	SC508	TAGTGTAG	AGTCAGTCAG	CC	GGACTACHVGGGTWTCTAAT	2	Low
Low11	Low body condition 11	TATGGTAATTGTGTGCCAGCMGCCGCGGTAAAGTCAGTCAGCCGGACTACHVGGGTWTCTAAT	SC711	CATCGTGA	TATGGTAATT	GT	GTGCCAGCMGCCGCGGTAA	SC501	ACGACGTG	AGTCAGTCAG	CC	GGACTACHVGGGTWTCTAAT	2plus	Low
Low12	Low body condition 12	TATGGTAATTGTGTGCCAGCMGCCGCGGTAAAGTCAGTCAGCCGGACTACHVGGGTWTCTAAT	SC711	CATCGTGA	TATGGTAATT	GT	GTGCCAGCMGCCGCGGTAA	SC502	ATATACAC	AGTCAGTCAG	CC	GGACTACHVGGGTWTCTAAT	2	Low
Good6	Good body condition 6	TATGGTAATTGTGTGCCAGCMGCCGCGGTAAAGTCAGTCAGCCGGACTACHVGGGTWTCTAAT	SC711	CATCGTGA	TATGGTAATT	GT	GTGCCAGCMGCCGCGGTAA	SC503	CGTCGCTA	AGTCAGTCAG	CC	GGACTACHVGGGTWTCTAAT	5	Good
Good1	Good body condition 1	TATGGTAATTGTGTGCCAGCMGCCGCGGTAAAGTCAGTCAGCCGGACTACHVGGGTWTCTAAT	SD711	ACTGTGTA	TATGGTAATT	GT	GTGCCAGCMGCCGCGGTAA	SC507	TGCGTACG	AGTCAGTCAG	CC	GGACTACHVGGGTWTCTAAT	3plus	Good
Good2	Good body condition 2	TATGGTAATTGTGTGCCAGCMGCCGCGGTAAAGTCAGTCAGCCGGACTACHVGGGTWTCTAAT	SD711	ACTGTGTA	TATGGTAATT	GT	GTGCCAGCMGCCGCGGTAA	SC508	TAGTGTAG	AGTCAGTCAG	CC	GGACTACHVGGGTWTCTAAT	3plus	Good
Good3	Good body condition 3	TATGGTAATTGTGTGCCAGCMGCCGCGGTAAAGTCAGTCAGCCGGACTACHVGGGTWTCTAAT	SD712	TGCGTCAA	TATGGTAATT	GT	GTGCCAGCMGCCGCGGTAA	SC501	ACGACGTG	AGTCAGTCAG	CC	GGACTACHVGGGTWTCTAAT	4	Good
Good4	Good body condition 4	TATGGTAATTGTGTGCCAGCMGCCGCGGTAAAGTCAGTCAGCCGGACTACHVGGGTWTCTAAT	SD712	TGCGTCAA	TATGGTAATT	GT	GTGCCAGCMGCCGCGGTAA	SC502	ATATACAC	AGTCAGTCAG	CC	GGACTACHVGGGTWTCTAAT	3plus	Good
Low1	Low body condition 1	TATGGTAATTGTGTGCCAGCMGCCGCGGTAAAGTCAGTCAGCCGGACTACHVGGGTWTCTAAT	SD711	ACTGTGTA	TATGGTAATT	GT	GTGCCAGCMGCCGCGGTAA	SC501	ACGACGTG	AGTCAGTCAG	CC	GGACTACHVGGGTWTCTAAT	2	Low
Low2	Low body condition 2	TATGGTAATTGTGTGCCAGCMGCCGCGGTAAAGTCAGTCAGCCGGACTACHVGGGTWTCTAAT	SD711	ACTGTGTA	TATGGTAATT	GT	GTGCCAGCMGCCGCGGTAA	SC502	ATATACAC	AGTCAGTCAG	CC	GGACTACHVGGGTWTCTAAT	2	Low
Low3	Low body condition 3	TATGGTAATTGTGTGCCAGCMGCCGCGGTAAAGTCAGTCAGCCGGACTACHVGGGTWTCTAAT	SD711	ACTGTGTA	TATGGTAATT	GT	GTGCCAGCMGCCGCGGTAA	SC503	CGTCGCTA	AGTCAGTCAG	CC	GGACTACHVGGGTWTCTAAT	2	Low
Low4	Low body condition 4	TATGGTAATTGTGTGCCAGCMGCCGCGGTAAAGTCAGTCAGCCGGACTACHVGGGTWTCTAAT	SD711	ACTGTGTA	TATGGTAATT	GT	GTGCCAGCMGCCGCGGTAA	SC504	CTAGAGCT	AGTCAGTCAG	CC	GGACTACHVGGGTWTCTAAT	2	Low
Low5	Low body condition 5	TATGGTAATTGTGTGCCAGCMGCCGCGGTAAAGTCAGTCAGCCGGACTACHVGGGTWTCTAAT	SD711	ACTGTGTA	TATGGTAATT	GT	GTGCCAGCMGCCGCGGTAA	SC505	GCTCTAGT	AGTCAGTCAG	CC	GGACTACHVGGGTWTCTAAT	2	Low
Low6	Low body condition 6	TATGGTAATTGTGTGCCAGCMGCCGCGGTAAAGTCAGTCAGCCGGACTACHVGGGTWTCTAAT	SD711	ACTGTGTA	TATGGTAATT	GT	GTGCCAGCMGCCGCGGTAA	SC506	GACACTGA	AGTCAGTCAG	CC	GGACTACHVGGGTWTCTAAT	2plus	Low
NegativeControlGL	Negative Control 9	TATGGTAATTGTGTGCCAGCMGCCGCGGTAAAGTCAGTCAGCCGGACTACHVGGGTWTCTAAT	SD712	TGCGTCAA	TATGGTAATT	GT	GTGCCAGCMGCCGCGGTAA	SC503	CGTCGCTA	AGTCAGTCAG	CC	GGACTACHVGGGTWTCTAAT	Blank	Blank
