# Supplementary material for: Bacterial Communities in the Alpaca Gastrointestinal Tract Vary With Diet and Body Site
Source: Front Microbiol. 2019 Jan 18;9:3334. doi: 10.3389/fmicb.2018.03334 (PMC6345687; doi:10.3389/fmicb.2018.03334)
Supplement: Supplementary file 12 [file Table_3.xlsx]

## Sheet: Table S3
Table S3. Alpha diversity of samples in the body condition experiment. No significant differences in the alpha diversity of the microbiota in GBC and LBC alpacas was detected
Chao1	Group1	Group2	Group1 mean	Group1 std	Group2 mean	Group2 std	t stat	p-value
	Good	Control	3556.36	444.085	4895.22	0	2.54803	0.489
	Low	Control	3859.18	609.016	4895.22	0	1.55295	0.525
	Good	Low	3556.36	444.085	3859.18	609.016	-1.00729	0.987
Shannon	Group1	Group2	Group1 mean	Group1 std	Group2 mean	Group2 std	t stat	p-value
	Good	Control	8.28014	0.235061	9.22325	0	3.39092	0.342
	Low	Control	8.38071	0.387298	9.22325	0	1.98589	0.399
	Good	Low	8.28014	0.235061	8.38071	0.387298	-0.545197	1
Simpson	Group1	Group2	Group1 mean	Group1 std	Group2 mean	Group2 std	t stat	p-value
	Good	Control	0.991095	0.00182512	0.995347	0	1.96861	0.303
	Low	Control	0.99091	0.0031688	0.995347	0	1.27818	1
	Good	Low	0.991095	0.00182512	0.99091	0.0031688	0.124026	1
