# Supplementary material for: Bacterial Communities in the Alpaca Gastrointestinal Tract Vary With Diet and Body Site
Source: Front Microbiol. 2019 Jan 18;9:3334. doi: 10.3389/fmicb.2018.03334 (PMC6345687; doi:10.3389/fmicb.2018.03334)
Supplement: Supplementary file 15 [file Data_Sheet_3.xlsx]

## Sheet: Data Sheet 3
Data Sheet S3. Taxa that are differentially abundant with body site A. Summary statistics for the effect of body site on the microbiota of GH-fed or AH-fed alpacas (statistics calculated separately for alpacas fed each diet). % reads and % of taxa represents the percentages of reads and taxa, respectively, that were differentially abundant with body site in each group of alpacas. B-C. List of OTU…
A
	% of reads	% of taxa
Grass Hay-fed (GH)	0.808	0.207
Alfalfa Hay-fed (AH)	0.663	0.134
B
Grass Hay fed
OTU	Phylum	Class	Order	Family	Genus	Species	GH_c1	GH_jej	GH_Il	GH_cec	GH_LI
4446733	Firmicutes	Clostridia	Clostridiales				43.6	308	360.6	35.2	17.6
109634	Firmicutes	Clostridia	Clostridiales	[Mogibacteriaceae]	Mogibacterium		1.8	185.667	167.8	10.2	6.6
4448724	Firmicutes	Clostridia	Clostridiales	Clostridiaceae	Clostridium		0	0.333333	0	189.2	172.2
821401	Firmicutes	Clostridia	Clostridiales	Lachnospiraceae	Butyrivibrio		0.2	98.3333	97	6.2	2.4
4306044	Bacteroidetes	Bacteroidia	Bacteroidales	[Paraprevotellaceae]	CF231		0	0	0	139	172.4
587826	Actinobacteria	Actinobacteria	Bifidobacteriales	Bifidobacteriaceae			0	219.333	239.4	12	2.6
4308038	Bacteroidetes	Bacteroidia	Bacteroidales	Bacteroidaceae			0	0	0.2	179.2	167
169738	Firmicutes	Clostridia	Clostridiales	Lachnospiraceae	Butyrivibrio		0.2	30.3333	22.8	1	0.8
4481084	Firmicutes	Clostridia	Clostridiales	[Mogibacteriaceae]			0.6	116.667	119	5	3
2591716	Firmicutes	Clostridia	Clostridiales	[Mogibacteriaceae]	Mogibacterium		2.8	147.333	160.2	9.8	3.4
New.ReferenceOTU53	Actinobacteria	Coriobacteriia	Coriobacteriales	Coriobacteriaceae			0.4	51.3333	47	5	2.8
4404830	Firmicutes	Clostridia	Clostridiales	Ruminococcaceae			0.4	0	0	114.2	106.2
109978	Firmicutes	Clostridia	Clostridiales	Ruminococcaceae			2.4	118.333	138.6	10.2	3.8
274010	Chloroflexi	Anaerolineae	Anaerolineales	Anaerolinaceae	SHD-231		1	61.3333	37.2	7	2.6
4437589	Bacteroidetes	Bacteroidia	Bacteroidales	Bacteroidaceae			0	0.666667	0	123	137.4
109933	Firmicutes	Clostridia	Clostridiales				42.2	86	138.8	25.8	14.4
612629	Firmicutes	Clostridia	Clostridiales				0.8	121	76.8	22	19
821065	Bacteroidetes	Bacteroidia	Bacteroidales	Prevotellaceae	Prevotella		276.8	0.333333	0.8	0	0
321621	Bacteroidetes	Bacteroidia	Bacteroidales	[Paraprevotellaceae]	YRC22		0	0	0	47.6	46.8
4444790	Firmicutes	Clostridia	Clostridiales	Veillonellaceae	Phascolarctobacterium		0	0	0	78.4	81
99332	Actinobacteria	Coriobacteriia	Coriobacteriales	Coriobacteriaceae			1	117.333	145	14.6	8
288494	Verrucomicrobia	Verrucomicrobiae	Verrucomicrobiales	Verrucomicrobiaceae	Akkermansia		0	0	0	41.4	28.8
353696	Firmicutes	Clostridia	Clostridiales	Christensenellaceae			1.8	88.6667	78.8	8.4	2.6
164216	Firmicutes	Clostridia	Clostridiales	Lachnospiraceae			0	74.3333	97.2	4	1.6
New.CleanUp.ReferenceOTU0	Bacteroidetes	Bacteroidia	Bacteroidales	[Barnesiellaceae]			0	0	0	81.2	70.4
300053	Bacteroidetes	Bacteroidia	Bacteroidales	p-2534-18B5			0	0	0	49	58.2
4395530	Bacteroidetes	Bacteroidia	Bacteroidales	Bacteroidaceae	5-7N15		0	0	0	67.8	69.6
4409730	Firmicutes	Clostridia	Clostridiales				0	0	5.6	36.8	16.4
4426348	Verrucomicrobia	Verrucomicrobiae	Verrucomicrobiales	Verrucomicrobiaceae	Akkermansia		0	0	0	42.8	60.8
292851	Firmicutes	Clostridia	Clostridiales				0	13	13.2	0.6	0.2
1122110	Actinobacteria	Coriobacteriia	Coriobacteriales	Coriobacteriaceae			0.4	84.6667	54.2	8.6	2.2
4345515	Firmicutes	Clostridia	Clostridiales	Ruminococcaceae			0	0	0	52	51
319603	Firmicutes	Clostridia	Clostridiales	Lachnospiraceae	Anaerostipes		0.6	36	45.8	4	3.2
296698	Bacteroidetes	Bacteroidia	Bacteroidales				0	0	0	15.8	27
New.ReferenceOTU138	Bacteroidetes	Bacteroidia	Bacteroidales	Bacteroidaceae	BF311		0	0	0	85	80.2
801844	Firmicutes	Clostridia	Clostridiales				2.6	54	40.4	5.2	3.2
4326866	Firmicutes	Clostridia	Clostridiales	Ruminococcaceae			6.6	20.3333	16	2	0
291462	Firmicutes	Clostridia	Clostridiales	Lachnospiraceae	Butyrivibrio		0.2	38.6667	25.4	2	0.4
584954	Actinobacteria	Coriobacteriia	Coriobacteriales	Coriobacteriaceae			0.4	53.6667	65	6.8	1.6
4368466	Firmicutes	Clostridia	Clostridiales	[Mogibacteriaceae]			2	34	38.2	2	0.2
806675	Firmicutes	Clostridia	Clostridiales	Lachnospiraceae	Butyrivibrio		0.4	30	31.4	1	0.2
290977	Bacteroidetes	Bacteroidia	Bacteroidales				0	0	0	39.2	36.8
New.ReferenceOTU43	Verrucomicrobia	Verrucomicrobiae	Verrucomicrobiales	Verrucomicrobiaceae	Akkermansia		0	0	0	46	45.6
4483990	Bacteroidetes	Bacteroidia	Bacteroidales				0	0	0	50	42.4
New.ReferenceOTU154	Bacteroidetes	Bacteroidia	Bacteroidales	[Paraprevotellaceae]	YRC22		0.2	0	0	60.4	69.6
4317034	Bacteroidetes	Bacteroidia	Bacteroidales	Bacteroidaceae	5-7N15		0	0	0	33.6	43.2
209059	Firmicutes	Clostridia	Clostridiales				0	39	23.6	2.2	1
4324985	Firmicutes	Clostridia	Clostridiales	Ruminococcaceae			12.2	33.6667	46.2	1.4	0
208802	Firmicutes	Clostridia	Clostridiales	Christensenellaceae			4.4	14.6667	22.8	2.8	1.6
4464961	Verrucomicrobia	Verrucomicrobiae	Verrucomicrobiales	Verrucomicrobiaceae	Akkermansia		0	0	0	20.2	26.4
New.ReferenceOTU91	Bacteroidetes	Bacteroidia	Bacteroidales	p-2534-18B5			0	0	0.2	33.2	39.4
New.ReferenceOTU24	Chloroflexi	Anaerolineae	Anaerolineales	Anaerolinaceae	SHD-231		2.2	43.6667	32	6.8	3.4
4477796	Firmicutes	Clostridia	Clostridiales	Ruminococcaceae			0	0	0	34.8	29.2
4466705	Firmicutes	Clostridia	Clostridiales				5.2	27.6667	24.6	14.4	14
4360363	Firmicutes	Clostridia	Clostridiales				0.2	27	19.6	3	2.2
300694	Firmicutes	Clostridia	Clostridiales	Peptococcaceae	rc4-4		0	0	0	13.6	13.8
131386	Firmicutes	Clostridia	Clostridiales	Lachnospiraceae			0.6	20.3333	24.6	0.4	0.2
163696	Actinobacteria	Coriobacteriia	Coriobacteriales	Coriobacteriaceae			0	29.3333	33.4	1.6	1.6
289730	Firmicutes	Clostridia	Clostridiales	Peptostreptococcaceae			0	0.333333	26	16.6	9.6
New.ReferenceOTU392	Spirochaetes	Spirochaetes	Spirochaetales	Spirochaetaceae	Treponema		0	0	0	1	3
4341683	Firmicutes	Clostridia	Clostridiales	Lachnospiraceae	Dorea		0	0	0	12.8	13.4
292128	Firmicutes	Clostridia	Clostridiales	[Mogibacteriaceae]	Mogibacterium		0	8.33333	4.8	0.8	0.2
4434334	Firmicutes	Clostridia	Clostridiales	Peptostreptococcaceae			0.2	0.666667	5.4	22.2	7.6
99718	Firmicutes	Clostridia	Clostridiales				0	45	33.8	4	1.2
313390	Bacteroidetes	Bacteroidia	Bacteroidales				0	0	0	22.2	56.8
528013	Actinobacteria	Coriobacteriia	Coriobacteriales	Coriobacteriaceae			0	14.6667	14	2.2	0.4
New.ReferenceOTU186	Actinobacteria	Coriobacteriia	Coriobacteriales	Coriobacteriaceae			0	51.6667	37.4	1.8	1.4
294451	Verrucomicrobia	Verrucomicrobiae	Verrucomicrobiales	Verrucomicrobiaceae	Akkermansia		0	0	0	27.4	34.4
545127	Firmicutes	Clostridia	Clostridiales	[Mogibacteriaceae]			0	4.33333	4	0.4	0.2
271582	SR1						88.8	0	0.2	0	0
683549	Bacteroidetes	Bacteroidia	Bacteroidales	RF16			71.6	0.666667	0.8	0	0.2
170512	Planctomycetes	Planctomycetia	Pirellulales	Pirellulaceae			0.8	43	44.4	3.6	1.2
289362	Verrucomicrobia	Verrucomicrobiae	Verrucomicrobiales	Verrucomicrobiaceae	Akkermansia		0	0	0	20.6	23.4
298284	Firmicutes	Clostridia	Clostridiales				0	20	9	0.8	0
262032	Fibrobacteres	Fibrobacteria	Fibrobacterales	Fibrobacteraceae	Fibrobacter	succinogenes	104	0.333333	0.6	0	0
1142110	Firmicutes	Clostridia	Clostridiales	Peptostreptococcaceae			0	0.333333	4.4	30.8	17.4
522255	Firmicutes	Clostridia	Clostridiales	[Mogibacteriaceae]			0.4	23.6667	18.2	0.2	0
251970	Firmicutes	Clostridia	Clostridiales	Ruminococcaceae			3	18	24.6	0.2	0.2
4434031	Firmicutes	Clostridia	Clostridiales	Ruminococcaceae			7	0.333333	0	21.8	26.8
4427335	Firmicutes	Clostridia	Clostridiales				1.2	32.3333	22.6	5.8	6.4
333235	Bacteroidetes	Bacteroidia	Bacteroidales	Rikenellaceae			0	0	0	33.2	30.4
541167	Firmicutes	Clostridia	Clostridiales	[Mogibacteriaceae]			0.4	39.3333	44.2	2.4	0.4
287692	Bacteroidetes	Bacteroidia	Bacteroidales				0	0	0	21	26
4324038	Bacteroidetes	Bacteroidia	Bacteroidales	Bacteroidaceae	Bacteroides		0	0	0	31	43.8
351091	Cyanobacteria	4C0d-2	YS2				37.4	22.6667	19.4	1.4	2.8
4437592	Firmicutes	Clostridia	Clostridiales	Ruminococcaceae			2.8	0	0.4	9.2	17.8
2230984	Firmicutes	Clostridia	Clostridiales	Veillonellaceae	Succiniclasticum		39.2	0	0	0	0
512048	Actinobacteria	Coriobacteriia	Coriobacteriales	Coriobacteriaceae			0	44	30.8	3.8	1.8
2701897	Firmicutes	Clostridia	Clostridiales				2.6	33.3333	38.4	3.2	2.4
338226	Bacteroidetes	Bacteroidia	Bacteroidales	Bacteroidaceae	Bacteroides		0	0	0	45.4	51
110836	Firmicutes	Clostridia	Clostridiales	Ruminococcaceae			2	12.6667	17	1.4	0.6
New.ReferenceOTU277	Bacteroidetes	Bacteroidia	Bacteroidales	Prevotellaceae	Prevotella		78.6	0	0	0	0
New.ReferenceOTU173	Actinobacteria	Coriobacteriia	Coriobacteriales	Coriobacteriaceae			0.6	29	17.6	2.4	0.8
New.ReferenceOTU161	Chloroflexi	Anaerolineae	Anaerolineales	Anaerolinaceae	SHD-231		0.8	11.3333	8.2	2.4	1.6
New.ReferenceOTU124	Actinobacteria	Coriobacteriia	Coriobacteriales	Coriobacteriaceae			0.2	29.6667	29.4	5.8	1.8
New.ReferenceOTU61	Actinobacteria	Coriobacteriia	Coriobacteriales	Coriobacteriaceae	Adlercreutzia		0.6	50.3333	47.8	10.4	3.2
338039	Firmicutes	Clostridia	Clostridiales	Lachnospiraceae	Coprococcus		0.2	16.3333	24	1.2	0.8
248902	Firmicutes	Bacilli	Turicibacterales	Turicibacteraceae	Turicibacter		0	0	0.2	15.8	10.8
521275	Actinobacteria	Coriobacteriia	Coriobacteriales	Coriobacteriaceae			0.2	42	31.4	1.8	0.4
320615	Bacteroidetes	Bacteroidia	Bacteroidales	[Paraprevotellaceae]	CF231		10	0.666667	0	20	22
New.ReferenceOTU114	Bacteroidetes	Bacteroidia	Bacteroidales	[Paraprevotellaceae]	CF231		0	0	0	25	24
555917	Proteobacteria	Deltaproteobacteria	Desulfovibrionales	Desulfovibrionaceae			0	0	0	21.4	33.2
287662	Bacteroidetes	Bacteroidia	Bacteroidales				0	0	0	31.6	37.8
4464969	Firmicutes	Clostridia	Clostridiales	Ruminococcaceae			0.2	0	0	16.4	15
4238405	Firmicutes	Clostridia	Clostridiales				0	24	17.6	1.8	0.2
4324040	Firmicutes	Clostridia	Clostridiales	Ruminococcaceae			0	0	0	18.4	26
251961	Firmicutes	Clostridia	Clostridiales				0	21.3333	16.8	0.2	0.4
310781	Cyanobacteria	4C0d-2	YS2				21.6	10.6667	10	2	1.6
4299396	Firmicutes	Clostridia	Clostridiales	Ruminococcaceae			1	1.33333	3.4	9.6	6.8
789561	Firmicutes	Clostridia	Clostridiales				0.2	22.3333	6.8	8.4	7.4
163539	Firmicutes	Clostridia	Clostridiales	Lachnospiraceae			0	4	7.6	0	0
320856	Firmicutes	Clostridia	Clostridiales	Lachnospiraceae			0.2	3.66667	10	0.4	0
302501	Verrucomicrobia	Verrucomicrobiae	Verrucomicrobiales	Verrucomicrobiaceae	Akkermansia		0	0	0	13.4	23.6
110428	Firmicutes	Clostridia	Clostridiales				0.2	37	32	0.8	0.2
302856	Firmicutes	Clostridia	Clostridiales	Ruminococcaceae			0	0	0	11.4	21
296205	Bacteroidetes	Bacteroidia	Bacteroidales				0	0	0	10.8	20
4368792	Firmicutes	Clostridia	Clostridiales				1.2	41	29.6	3	2.2
3585	Fibrobacteres	Fibrobacteria	Fibrobacterales	Fibrobacteraceae	Fibrobacter	succinogenes	61	0.333333	0	0	0
350175	Firmicutes	Clostridia	Clostridiales	Lachnospiraceae			0	11	10.6	0.2	0
New.ReferenceOTU297	Actinobacteria	Coriobacteriia	Coriobacteriales	Coriobacteriaceae			0	42.6667	35.8	2.4	2.4
289091	Firmicutes	Clostridia	Clostridiales	Lachnospiraceae			0.4	23.3333	28.8	0.8	0.2
New.CleanUp.ReferenceOTU286	Bacteroidetes	Bacteroidia	Bacteroidales				0	0	0	25.8	28.2
4467491	Firmicutes	Clostridia	Clostridiales	Ruminococcaceae			0	0	0	16.6	20.2
294229	Firmicutes	Clostridia	Clostridiales				0	0	0	19.4	17.4
309179	Firmicutes	Clostridia	Clostridiales	Clostridiaceae			0.8	6.33333	10.6	1.2	0.8
100265	Bacteroidetes	Bacteroidia	Bacteroidales	Prevotellaceae	Prevotella		18.4	0	0.8	0	0.4
4304092	Bacteroidetes	Bacteroidia	Bacteroidales	BS11			33.4	0.333333	0.2	0	0
320783	Firmicutes	Clostridia	Clostridiales	[Mogibacteriaceae]			0	21.3333	42	2.4	1.6
110829	Firmicutes	Clostridia	Clostridiales				0.2	25	19.4	3.6	0.8
4306005	Bacteroidetes	Bacteroidia	Bacteroidales				0	0	0	18.8	15.8
335032	Firmicutes	Clostridia	Clostridiales				0.2	16	16.4	0	0
302943	Firmicutes	Clostridia	Clostridiales				0.2	37	17.6	2.2	0
249189	Firmicutes	Clostridia	Clostridiales				0	32.6667	16.2	1.2	0.2
52163	Firmicutes	Clostridia	Clostridiales	Lachnospiraceae	Butyrivibrio		0	19	10.8	0.2	0
2115	Bacteroidetes	Bacteroidia	Bacteroidales	Prevotellaceae	Prevotella		52.2	3	2.4	0.6	0
2863553	Firmicutes	Clostridia	Clostridiales	[Mogibacteriaceae]			0.4	34	30.6	1.2	0.4
3206495	Firmicutes	Clostridia	Clostridiales				8.8	22.6667	29.8	5.4	4
4476773	Firmicutes	Clostridia	Clostridiales				1.2	0	1	13	21.8
4366524	Firmicutes	Clostridia	Clostridiales				5.8	1.33333	3.6	14	15.4
New.CleanUp.ReferenceOTU15	Bacteroidetes	Bacteroidia	Bacteroidales	S24-7			0	0	0	14.8	12.4
3030115	Firmicutes	Clostridia	Clostridiales	[Mogibacteriaceae]			0	20	19	0.6	1.6
105434	Firmicutes	Clostridia	Clostridiales				1.8	27	39.2	0.4	2
300390	Firmicutes	Clostridia	Clostridiales				0	13	8.6	1	0.2
107586	Bacteroidetes	Bacteroidia	Bacteroidales	Prevotellaceae	Prevotella		48.2	0.333333	1	0.2	0
4465124	Firmicutes	Clostridia	Clostridiales				0	0	0	16	13.8
4319108	Firmicutes	Clostridia	Clostridiales	Ruminococcaceae			0	0	0	16.4	15.8
297266	Bacteroidetes	Bacteroidia	Bacteroidales	Rikenellaceae			0	0	0	23.2	15.4
109841	Firmicutes	Clostridia	Clostridiales	Ruminococcaceae			9	0	0	23.6	9.8
New.ReferenceOTU406	Bacteroidetes	Bacteroidia	Bacteroidales	Bacteroidaceae			0	0	0	27.2	23
100850	Bacteroidetes	Bacteroidia	Bacteroidales	Prevotellaceae	Prevotella		28.4	1.33333	1.2	0	0
4422928	Bacteroidetes	Bacteroidia	Bacteroidales	Bacteroidaceae			0	0	0	14.6	21.8
4388432	Bacteroidetes	Bacteroidia	Bacteroidales				0	0	0	15.2	11.8
302388	Firmicutes	Clostridia	Clostridiales	Ruminococcaceae			0	0	0	13.2	16.2
315271	Bacteroidetes	Bacteroidia	Bacteroidales	[Paraprevotellaceae]	YRC22		40	0.333333	0	3.6	6.4
295977	Firmicutes	Clostridia	Clostridiales				0	20.3333	12.8	0	0.2
298161	Bacteroidetes	Bacteroidia	Bacteroidales	Bacteroidaceae			0	0	0	16	13.4
826531	Bacteroidetes	Bacteroidia	Bacteroidales	Prevotellaceae	Prevotella		49	0.333333	1.2	0	0
3869719	Firmicutes	Clostridia	Clostridiales				0.2	16	9.6	0.2	0.6
346003	Firmicutes	Clostridia	Clostridiales				0	31.3333	38.4	0.6	0.2
New.ReferenceOTU605	Actinobacteria	Coriobacteriia	Coriobacteriales	Coriobacteriaceae			0.4	24.3333	20.8	3.6	1.4
346761	Firmicutes	Clostridia	Clostridiales	Ruminococcaceae			0	0	0	30	26.8
260907	Firmicutes	Clostridia	Clostridiales				0	24.6667	16.4	1.6	0.2
4473883	Firmicutes	Bacilli	Lactobacillales	Streptococcaceae	Streptococcus		0.6	19.6667	29.8	1.4	0
4436380	Bacteroidetes	Bacteroidia	Bacteroidales	BS11			0	0	0	16.4	18.6
310662	Firmicutes	Clostridia	Clostridiales				0	20.3333	10.6	0.4	0
103100	Bacteroidetes	Bacteroidia	Bacteroidales	Prevotellaceae	Prevotella		40.6	0	0	0	0
4452756	Firmicutes	Clostridia	Clostridiales	Veillonellaceae			21.6	0	0.2	0	0.2
2093	Bacteroidetes	Bacteroidia	Bacteroidales	Prevotellaceae	Prevotella		26	0	0	0.2	0
New.ReferenceOTU387	Actinobacteria	Coriobacteriia	Coriobacteriales	Coriobacteriaceae			0	14.3333	17.4	1.4	0.6
New.ReferenceOTU411	Actinobacteria	Coriobacteriia	Coriobacteriales	Coriobacteriaceae			0.2	36.6667	23.2	2.8	1
215731	Firmicutes	Clostridia	Clostridiales				2.4	0.666667	0.2	13.6	12.2
142942	Firmicutes	Clostridia	Clostridiales				0.4	22.6667	21.8	1.2	0
590209	Firmicutes	Clostridia	Clostridiales				0	0	0	10.8	11.8
4388430	Firmicutes	Clostridia	Clostridiales	Ruminococcaceae	Ruminococcus	flavefaciens	0	0	0	10	13.6
331350	TM7	TM7-3	CW040	F16			0.6	10.3333	18.4	1.8	1.2
4430922	Tenericutes	Mollicutes	RF39				2.4	19	15.6	1.8	2.8
4415144	Bacteroidetes	Bacteroidia	Bacteroidales	Bacteroidaceae	5-7N15		0	0	0	18.4	14
2113	Bacteroidetes	Bacteroidia	Bacteroidales	Prevotellaceae	Prevotella		30.6	2.66667	0.8	0	0
New.ReferenceOTU750	Firmicutes	Clostridia	Clostridiales				0	9	13.8	0.2	0
2781880	Firmicutes	Clostridia	Clostridiales	Ruminococcaceae			0	0	0	15	17.8
331227	Firmicutes	Clostridia	Clostridiales	[Mogibacteriaceae]			0	7.66667	8.8	0.8	0
324219	Firmicutes	Clostridia	Clostridiales	Ruminococcaceae			0.8	0	0.4	10.6	9
4442699	Firmicutes	Clostridia	Clostridiales	Lachnospiraceae			0	0	0	15.4	16.2
325578	Firmicutes	Clostridia	Clostridiales				0	28	14.6	2.2	0
293621	Firmicutes	Clostridia	Clostridiales	Ruminococcaceae			0	0	0	9.4	9.8
348641	Firmicutes	Clostridia	Clostridiales	Lachnospiraceae			0	9	11.2	0.2	0
4440297	Firmicutes	Clostridia	Clostridiales	Ruminococcaceae			0	0	0	15.6	17.6
290908	Firmicutes	Clostridia	Clostridiales				0	0	0	7.8	10.8
111024	Firmicutes	Clostridia	Clostridiales				0.4	27.6667	14.8	1	0.4
2116	Bacteroidetes	Bacteroidia	Bacteroidales	Prevotellaceae	Prevotella		15	0	0	0	0
291587	Bacteroidetes	Bacteroidia	Bacteroidales				0	0.333333	0	13	18.2
New.ReferenceOTU440	Planctomycetes	Planctomycetia	Pirellulales	Pirellulaceae			0	0	0	5.2	8.6
4347265	Firmicutes	Clostridia	Clostridiales	Clostridiaceae			0	0	0	10	8.4
347267	Firmicutes	Clostridia	Clostridiales	Veillonellaceae	Succiniclasticum		9.4	0.333333	0	0.2	0
326774	Firmicutes	Clostridia	Clostridiales	Ruminococcaceae	Ruminococcus		0.6	9.33333	9.6	0.6	0.4
308706	Firmicutes	Clostridia	Clostridiales	Ruminococcaceae			0	0	0	16.8	17.4
4424113	Firmicutes	Clostridia	Clostridiales				0.8	0	0	10.8	9
3220254	Firmicutes	Clostridia	Clostridiales				0.8	15.3333	16.6	2.2	0.4
4317001	Planctomycetes	Planctomycetia	Pirellulales	Pirellulaceae			0	0	0	12.6	14
4353974	Firmicutes	Clostridia	Clostridiales	Veillonellaceae	Succiniclasticum		40.2	0	1.4	0	0
300384	Bacteroidetes	Bacteroidia	Bacteroidales	Bacteroidaceae	5-7N15		0	0	0	16.4	11.2
New.ReferenceOTU127	Firmicutes	Erysipelotrichi	Erysipelotrichales	Erysipelotrichaceae	Bulleidia		0	1	3	0	0
520966	Firmicutes	Clostridia	Clostridiales	[Mogibacteriaceae]	Mogibacterium		0	2	3.4	0.2	0.2
287402	Firmicutes	Clostridia	Clostridiales				0	0	0	12.8	8
758884	Firmicutes	Clostridia	Clostridiales				0	1	4.6	0	0
4466708	Bacteroidetes	Bacteroidia	Bacteroidales	Bacteroidaceae			0	0	0	18.2	18.4
168625	Firmicutes	Clostridia	Clostridiales				0	4.66667	4.2	0	0.2
340817	Bacteroidetes	Bacteroidia	Bacteroidales				39.6	0.333333	1	0	0
306769	Firmicutes	Clostridia	Clostridiales				0	0	0	10.6	8
4424923	Firmicutes	Clostridia	Clostridiales	Lachnospiraceae	Butyrivibrio		11.2	2.66667	2.2	0	0
165266	Firmicutes	Clostridia	Clostridiales	Lachnospiraceae			0.8	28.3333	17	0.4	0.4
15700	Tenericutes	Mollicutes	RF39				1.4	0.333333	0.2	6.4	12.4
4449939	Firmicutes	Clostridia	Clostridiales	Lachnospiraceae			4.4	2	8.6	0	0.4
1579256	Firmicutes	Clostridia	Clostridiales	Ruminococcaceae	Oscillospira		0	0	0	17.8	10.6
4398588	Firmicutes	Clostridia	Clostridiales	Ruminococcaceae			0	0	0	22	10.4
667184	Firmicutes	Clostridia	Clostridiales	Ruminococcaceae			0.2	0	0.2	24.6	14
615455	Firmicutes	Clostridia	Clostridiales	Ruminococcaceae			1.2	0	0	15.2	14.6
309134	Bacteroidetes	Bacteroidia	Bacteroidales	Prevotellaceae	Prevotella	copri	0	0	0	10.2	8.2
290086	Firmicutes	Clostridia	Clostridiales				0	13	10.2	2.4	1.4
15993	Firmicutes	Clostridia	Clostridiales				2.8	0	0.2	7.4	9
4476780	Bacteroidetes	Bacteroidia	Bacteroidales	Rikenellaceae			0	0	0	3.2	4.8
4342690	Firmicutes	Clostridia	Clostridiales	Ruminococcaceae			0	0	0	13.6	11.4
299280	Firmicutes	Clostridia	Clostridiales	Ruminococcaceae			3.4	10.6667	13.4	0.4	1.8
4445078	Firmicutes	Clostridia	Clostridiales				2.6	4.33333	13	2	1.6
4411102	Bacteroidetes	Bacteroidia	Bacteroidales				39	0	0	0	0
265316	Firmicutes	Clostridia	Clostridiales				0.2	5.66667	4.6	0.4	0.4
3841096	Firmicutes	Clostridia	Clostridiales	Ruminococcaceae	Oscillospira		2.4	3.33333	6.2	0.4	0
301121	Bacteroidetes	Bacteroidia	Bacteroidales				0	0	0	11.6	18.8
244436	Cyanobacteria	4C0d-2	YS2				13	7.33333	4	0.2	0.2
4316060	Firmicutes	Clostridia	Clostridiales	Lachnospiraceae	Pseudobutyrivibrio		18.4	0	0.2	0	0
298408	Firmicutes	Clostridia	Clostridiales				0	2.66667	5.4	5	7.4
New.CleanUp.ReferenceOTU290	Bacteroidetes	Bacteroidia	Bacteroidales				0	0	0	20.2	17
309471	Firmicutes	Clostridia	Clostridiales	Lachnospiraceae			0.2	16	23	0.6	0.2
New.CleanUp.ReferenceOTU34	Actinobacteria	Coriobacteriia	Coriobacteriales	Coriobacteriaceae			0	16.3333	28	3.8	0.8
4306002	Bacteroidetes	Bacteroidia	Bacteroidales				0	0	0	11.8	11.6
4377149	Firmicutes	Clostridia	Clostridiales				0.4	4	6	10	7.6
329817	Firmicutes	Clostridia	Clostridiales	Lachnospiraceae			1.2	5.33333	20	1.6	0.4
272425	Firmicutes	Clostridia	Clostridiales				0.2	7	8.8	5.8	5
248900	Firmicutes	Clostridia	Clostridiales				0.6	12.3333	18.2	0.2	0.2
New.CleanUp.ReferenceOTU12	Bacteroidetes	Bacteroidia	Bacteroidales	Bacteroidaceae	BF311		41.4	0	0	0	0
291387	Firmicutes	Clostridia	Clostridiales	Lachnospiraceae	Dorea		0	0	0	18.6	10.4
310432	Bacteroidetes	Bacteroidia	Bacteroidales	[Paraprevotellaceae]	YRC22		22.4	15.3333	8.8	0.2	0.2
318637	Bacteroidetes	Bacteroidia	Bacteroidales	Prevotellaceae	Prevotella		40.4	0.333333	0	0	0
4336750	Firmicutes	Clostridia	Clostridiales	Ruminococcaceae	Oscillospira		0	0	0	10.2	12
838685	Firmicutes	Clostridia	Clostridiales	Ruminococcaceae	Oscillospira		0	1	0	17.2	16.2
264735	SR1						21	0	0.2	0	0
317517	Firmicutes	Clostridia	Clostridiales				0.4	8.66667	12.2	1.2	0
259033	Bacteroidetes	Bacteroidia	Bacteroidales	Prevotellaceae	Prevotella		39.4	0	0	0	0
New.ReferenceOTU694	Firmicutes	Clostridia	Clostridiales				0	12.3333	7.6	0.6	0.8
301614	Cyanobacteria	4C0d-2	YS2				13	2.66667	9.6	0.8	1
349451	Firmicutes	Clostridia	Clostridiales	Ruminococcaceae			0	0	0	8	12.2
301425	Bacteroidetes	Bacteroidia	Bacteroidales	Bacteroidaceae			0	0	0	17.8	13.8
304123	Firmicutes	Clostridia	Clostridiales	Lachnospiraceae			0	0	0	7.6	14.8
New.ReferenceOTU0	SR1						33.2	0	0	0	0
209606	Bacteroidetes	Bacteroidia	Bacteroidales	Bacteroidaceae	BF311		38.8	0	0	0	0
New.ReferenceOTU379	Actinobacteria	Coriobacteriia	Coriobacteriales	Coriobacteriaceae			0.4	19.6667	24.6	1.2	0.6
316597	Bacteroidetes	Bacteroidia	Bacteroidales	Rikenellaceae			0	0	0	15.2	15.2
4314125	Firmicutes	Clostridia	Clostridiales	Ruminococcaceae			0	0.333333	0	8	8
4478502	Firmicutes	Clostridia	Clostridiales				0	10.3333	8.8	0.6	0.2
273321	Fibrobacteres	Fibrobacteria	Fibrobacterales	Fibrobacteraceae	Fibrobacter	succinogenes	33.8	0.333333	0	0	0
4381548	Firmicutes	Clostridia	Clostridiales	Ruminococcaceae			0	0	0	11.4	8.4
New.ReferenceOTU13	Firmicutes	Clostridia	Clostridiales	Veillonellaceae			24.4	0.333333	0.6	0	0
4315467	Bacteroidetes	Bacteroidia	Bacteroidales				23.4	0.333333	0	0	0
4314602	Bacteroidetes	Bacteroidia	Bacteroidales				0	0	0	10.2	7.6
847896	Firmicutes	Clostridia	Clostridiales	Lachnospiraceae	Butyrivibrio		10.4	2.33333	0.8	0	0
173378	Firmicutes	Clostridia	Clostridiales	Lachnospiraceae	Butyrivibrio		0.2	10.6667	8.8	0	0
New.ReferenceOTU16	Synergistetes	Synergistia	Synergistales	Dethiosulfovibrionaceae	TG5		20.8	1	0.4	0.6	0
169897	Firmicutes	Clostridia	Clostridiales				0.8	14.3333	11.4	1.2	0.8
New.ReferenceOTU721	Firmicutes	Clostridia	Clostridiales	[Mogibacteriaceae]			0	14	7.8	0	0.6
4310675	Firmicutes	Clostridia	Clostridiales				0	0	0	10.6	4.8
301603	Spirochaetes	Spirochaetes	Spirochaetales	Spirochaetaceae	Treponema		0	0	0	5.2	9.8
312588	Firmicutes	Clostridia	Clostridiales	Lachnospiraceae			0.4	6	11.6	1.4	0.2
270261	Firmicutes	Clostridia	Clostridiales				0	0	0	6.6	2.6
172998	Bacteroidetes	Bacteroidia	Bacteroidales	Prevotellaceae	Prevotella		23.6	0.333333	0.8	0	0
4447373	Firmicutes	Clostridia	Clostridiales	Ruminococcaceae			1	0	0	10	9.4
287744	Firmicutes	Clostridia	Clostridiales	[Mogibacteriaceae]			0	0	0	9.2	6.2
4447992	Firmicutes	Bacilli	Lactobacillales	Streptococcaceae	Streptococcus		0	9	9.2	0	0
4346168	Tenericutes	Mollicutes	RF39				0.6	0	0	9.4	11.6
4322943	Firmicutes	Clostridia	Clostridiales	Lachnospiraceae	Coprococcus		0	0	0	16.2	9.2
318599	Firmicutes	Clostridia	Clostridiales	Lachnospiraceae			0	21.3333	15.4	0.4	0.4
315975	Firmicutes	Clostridia	Clostridiales				0	5.66667	9.6	0.4	0
295879	Firmicutes	Clostridia	Clostridiales	Ruminococcaceae	Oscillospira		0	0	0	13	12
307953	Bacteroidetes	Bacteroidia	Bacteroidales	[Paraprevotellaceae]	CF231		26	0	0	0	0
132438	Synergistetes	Synergistia	Synergistales	Dethiosulfovibrionaceae	TG5		17.2	0.666667	0	0.4	0
112166	Firmicutes	Clostridia	Clostridiales	Ruminococcaceae	Ruminococcus		0.6	5.66667	11.2	0.4	0
New.ReferenceOTU536	Firmicutes	Erysipelotrichi	Erysipelotrichales	Erysipelotrichaceae			0	20.6667	14.8	0.6	0.8
206587	Bacteroidetes	Bacteroidia	Bacteroidales	Prevotellaceae	Prevotella		20.8	1.66667	0.6	0	0
4317030	Firmicutes	Clostridia	Clostridiales	Clostridiaceae			0	0	0	12	11.4
351800	Actinobacteria	Coriobacteriia	Coriobacteriales	Coriobacteriaceae			0	11.3333	8.6	1.2	0
301900	Firmicutes	Clostridia	Clostridiales	[Mogibacteriaceae]			0	0	0	7.2	5.4
354054	Firmicutes	Clostridia	Clostridiales	Ruminococcaceae			0	0	0	8.4	7.2
New.ReferenceOTU9	Proteobacteria	Deltaproteobacteria	Desulfovibrionales	Desulfovibrionaceae	Desulfovibrio		18.6	0	0	0	0
693893	Bacteroidetes	Bacteroidia	Bacteroidales				0	0	0	5.2	12.6
293285	Firmicutes	Clostridia	Clostridiales	Ruminococcaceae	Oscillospira		0.8	0	0	6	13.2
557137	Firmicutes	Clostridia	Clostridiales	Lachnospiraceae	Coprococcus		0	6	8.6	0.6	0
265483	Firmicutes	Clostridia	Clostridiales	Ruminococcaceae	Oscillospira		0	0	0	11.8	3.6
563055	Bacteroidetes	Bacteroidia	Bacteroidales				26	0	0.6	0	0
333616	Firmicutes	Clostridia	Clostridiales	Ruminococcaceae			0	0	0	10	9.2
309161	Firmicutes	Clostridia	Clostridiales	Lachnospiraceae			0	3.33333	1.8	0.2	0
333055	Firmicutes	Clostridia	Clostridiales				0	15.6667	9.8	1.2	0
329058	Firmicutes	Erysipelotrichi	Erysipelotrichales	Erysipelotrichaceae	Bulleidia		0	8.66667	4.8	0.2	1.2
2142752	Firmicutes	Clostridia	Clostridiales	Christensenellaceae			0.2	9.66667	8.2	1.4	0.4
628517	Lentisphaerae	[Lentisphaeria]	Victivallales	Victivallaceae			30.8	0	1	0	0.2
261161	Firmicutes	Clostridia	Clostridiales				0.2	0	0	6.6	8.6
4473788	Firmicutes	Clostridia	Clostridiales	Lachnospiraceae			0	0	0	1.2	2.8
4407030	Firmicutes	Clostridia	Clostridiales	Lachnospiraceae			0	9	12.2	0.2	0
4383093	Firmicutes	Clostridia	Clostridiales	Lachnospiraceae	Dorea		0	0	0	8.8	8.2
313601	Firmicutes	Clostridia	Clostridiales	Ruminococcaceae			0	0	0	2.2	2.6
356624	Firmicutes	Clostridia	Clostridiales	[Mogibacteriaceae]			0	6.33333	6.2	0.2	0.2
322004	Firmicutes	Clostridia	Clostridiales	Ruminococcaceae			0	0	0	9.6	9
320207	Firmicutes	Clostridia	Clostridiales	Ruminococcaceae			0.4	12.3333	9.4	0.6	0.4
New.ReferenceOTU349	Actinobacteria	Coriobacteriia	Coriobacteriales	Coriobacteriaceae			0.4	16	13	1.8	1
777572	Bacteroidetes	Bacteroidia	Bacteroidales	Prevotellaceae	Prevotella		29.4	0.333333	0	0	0
4469302	Firmicutes	Clostridia	Clostridiales	Lachnospiraceae			0	0	0	7.2	8.2
4463569	Firmicutes	Clostridia	Clostridiales	Ruminococcaceae			0	0	0	10.6	7.2
313733	Tenericutes	Mollicutes	RF39				2.6	16.6667	16.6	0.4	0.8
294944	Bacteroidetes	Bacteroidia	Bacteroidales				0	0	0.2	7	5
580773	Bacteroidetes	Bacteroidia	Bacteroidales	[Paraprevotellaceae]	CF231		17.4	0.333333	0.2	0	0.4
335018	Firmicutes	Clostridia	Clostridiales	Ruminococcaceae			0	0	0	11	6.4
298036	Firmicutes	Clostridia	Clostridiales	Ruminococcaceae			11	0.333333	0	0	0
New.CleanUp.ReferenceOTU101	Planctomycetes	Planctomycetia	Pirellulales	Pirellulaceae			0	15	11.4	0.8	0.2
New.CleanUp.ReferenceOTU317	Firmicutes	Clostridia	Clostridiales	Ruminococcaceae			0	0	0	6.2	5.4
329112	Firmicutes	Clostridia	Clostridiales	Ruminococcaceae			0	0	0	7.8	12
110355	Firmicutes	Clostridia	Clostridiales				0	10.6667	8.6	0.8	0
New.CleanUp.ReferenceOTU61	Bacteroidetes	Bacteroidia	Bacteroidales				9	0	0.2	0	0
4338349	Firmicutes	Clostridia	Clostridiales				0	0	0	8.8	11.8
308786	Firmicutes	Clostridia	Clostridiales	Ruminococcaceae	Ruminococcus		2.6	8.66667	11.8	1.6	0.4
4419504	Firmicutes	Clostridia	Clostridiales	Clostridiaceae	Clostridium		0	0	0	10	9.2
589658	Firmicutes	Clostridia	Clostridiales				0	0	0	8.2	11.6
3007575	Firmicutes	Clostridia	Clostridiales				0	0	1.6	0.2	0
311707	Firmicutes	Clostridia	Clostridiales	Ruminococcaceae			0	0	0	6.8	7
298190	Firmicutes	Clostridia	Clostridiales				0	0	0	7.4	5.2
294659	Cyanobacteria	4C0d-2	YS2				0	0.333333	1.2	5.4	12.2
85799	Bacteroidetes	Bacteroidia	Bacteroidales	Prevotellaceae	Prevotella		28.4	0.333333	0	0	0
4310677	Firmicutes	Clostridia	Clostridiales	Ruminococcaceae			0	0	0	5	10.8
289581	Bacteroidetes	Bacteroidia	Bacteroidales				0	0	0	4.4	4.6
109624	Firmicutes	Clostridia	Clostridiales	[Mogibacteriaceae]	Mogibacterium		0.8	12.6667	7	0.8	0.8
292699	Bacteroidetes	Bacteroidia	Bacteroidales	Prevotellaceae	Prevotella		7.2	0	0	0	0
New.ReferenceOTU674	Bacteroidetes	Bacteroidia	Bacteroidales	S24-7			0	0	0	7.4	7
4304967	Bacteroidetes	Bacteroidia	Bacteroidales	Prevotellaceae	Prevotella		20.6	4	3.4	0	0
105974	Firmicutes	Clostridia	Clostridiales	Lachnospiraceae	Butyrivibrio		4.2	0	0.2	0	0
New.CleanUp.ReferenceOTU96	Actinobacteria	Coriobacteriia	Coriobacteriales	Coriobacteriaceae			0.2	14	15.2	2.4	0.2
248112	Bacteroidetes	Bacteroidia	Bacteroidales				17.2	1.66667	0.6	0	0
149120	Firmicutes	Clostridia	Clostridiales	Lachnospiraceae			0	10	6.6	0.6	0.2
4322125	Firmicutes	Clostridia	Clostridiales	Ruminococcaceae			0	0	0	6	7.4
300463	Bacteroidetes	Bacteroidia	Bacteroidales	RF16			0	0	0	6.6	8.8
295828	Firmicutes	Clostridia	Clostridiales	Ruminococcaceae			0	0	0	11.2	8.6
205250	Firmicutes	Clostridia	Clostridiales				0.2	10	5.8	0.2	0.2
New.ReferenceOTU28	Synergistetes	Synergistia	Synergistales	Dethiosulfovibrionaceae	TG5		2.6	0	0.8	0	0
4408418	Firmicutes	Clostridia	Clostridiales	Ruminococcaceae			0	0	0	7.6	6.8
4380358	Firmicutes	Clostridia	Clostridiales	Ruminococcaceae			0	0	0	7.6	7.8
4296771	Firmicutes	Clostridia	Clostridiales	Ruminococcaceae			0	0	0	7.8	7
291643	Firmicutes	Clostridia	Clostridiales				0	0	0	3.8	5.6
New.ReferenceOTU711	Firmicutes	Clostridia	Clostridiales	Lachnospiraceae			0.2	12	12.6	0.2	0
New.CleanUp.ReferenceOTU200	Bacteroidetes	Bacteroidia	Bacteroidales	Bacteroidaceae	5-7N15		0	0	0	6.4	6
289140	Firmicutes	Clostridia	Clostridiales	[Mogibacteriaceae]			0	0	0	9.8	8
289208	Firmicutes	Clostridia	Clostridiales	Ruminococcaceae			0	0	0	10	4.2
4356914	Bacteroidetes	Bacteroidia	Bacteroidales				0	0	0	9.2	5
731499	Bacteroidetes	Bacteroidia	Bacteroidales				0	0	0	8.4	10.8
340514	Cyanobacteria	4C0d-2	YS2				6.8	1	3.8	0.4	0
321960	Firmicutes	Clostridia	Clostridiales	Ruminococcaceae			0	0	0	10.2	7.8
304400	Firmicutes	Clostridia	Clostridiales				4.6	7.33333	10.6	1.4	0.4
292186	Firmicutes	Clostridia	Clostridiales				1.4	5.66667	3.2	0.8	0
4318315	Firmicutes	Clostridia	Clostridiales				0	0	0	6.6	3
450576	Firmicutes	Clostridia	Clostridiales	Ruminococcaceae			0	0	0	9	7.2
299259	Verrucomicrobia	Opitutae	[Cerasicoccales]	[Cerasicoccaceae]			19.6	0	0	0	0
New.CleanUp.ReferenceOTU198	Actinobacteria	Coriobacteriia	Coriobacteriales	Coriobacteriaceae			0	5.33333	9.6	0.4	0.2
529263	Firmicutes	Clostridia	Clostridiales	[Mogibacteriaceae]			0	3	4.4	0.2	0
344506	Bacteroidetes	Bacteroidia	Bacteroidales				8.4	0	0	0	0
339530	Firmicutes	Clostridia	Clostridiales				0	12.6667	5.4	2.4	1.8
797570	Bacteroidetes	Bacteroidia	Bacteroidales	Prevotellaceae	Prevotella		19.2	0	0	0	0
297897	Bacteroidetes	Bacteroidia	Bacteroidales				0	0	0	3	2.4
288198	Firmicutes	Clostridia	Clostridiales	Ruminococcaceae			0	0	0	6	5.8
214310	Tenericutes	Mollicutes	RF39				1.2	11.6667	5.2	0.4	0.6
4435575	Firmicutes	Clostridia	Clostridiales				0	0	0	5.2	2.4
310757	Firmicutes	Clostridia	Clostridiales	[Mogibacteriaceae]			0	1	2	0	0
293254	Firmicutes	Clostridia	Clostridiales	Ruminococcaceae			0	0	0	8.6	10.4
289310	Firmicutes	Clostridia	Clostridiales	Ruminococcaceae			0	0	0	5.8	7
287496	Firmicutes	Clostridia	Clostridiales	Ruminococcaceae			2.2	0	0	7.6	7
New.ReferenceOTU388	Actinobacteria	Coriobacteriia	Coriobacteriales	Coriobacteriaceae			0.2	14	11.8	0.6	0.8
191281	Firmicutes	Clostridia	Clostridiales	Ruminococcaceae			0.4	0	0	3	6.2
151714	Firmicutes	Clostridia	Clostridiales	[Mogibacteriaceae]	Mogibacterium		0	1.33333	1	0	0
New.ReferenceOTU679	Firmicutes	Clostridia	Clostridiales	Ruminococcaceae			0	0	0	7.6	7.4
New.CleanUp.ReferenceOTU73	Firmicutes	Clostridia	Clostridiales	Lachnospiraceae			0	9.33333	8.2	0.6	0
296023	Firmicutes	Clostridia	Clostridiales	Ruminococcaceae			0	0	0	5.4	5.2
293575	Firmicutes	Clostridia	Clostridiales	Ruminococcaceae			0	0	0	8.6	8.6
4435305	Firmicutes	Clostridia	Clostridiales	Ruminococcaceae			0	0	0	9.8	7.2
4314257	Firmicutes	Clostridia	Clostridiales	Ruminococcaceae	Oscillospira		0.2	0	0	4.2	6.6
4298020	Bacteroidetes	Bacteroidia	Bacteroidales				0	0	0	10	8.8
269309	Bacteroidetes	Bacteroidia	Bacteroidales	Bacteroidaceae	BF311		23.8	0	0	0	0
44151	Firmicutes	Clostridia	Clostridiales	Ruminococcaceae			1.6	8	7.4	0.6	1.8
New.CleanUp.ReferenceOTU396	Firmicutes	Clostridia	Clostridiales	Ruminococcaceae			0	0	0	7.6	8.8
New.CleanUp.ReferenceOTU224	Actinobacteria	Coriobacteriia	Coriobacteriales	Coriobacteriaceae			0	9.33333	12.8	0.4	0.6
355249	Bacteroidetes	Bacteroidia	Bacteroidales	[Paraprevotellaceae]	Paraprevotella		0	0	0	13	8.6
4430921	Bacteroidetes	Bacteroidia	Bacteroidales	S24-7			0	0	0	6.4	6.4
347042	Firmicutes	Clostridia	Clostridiales	Ruminococcaceae			0	0	0	5	5.4
294360	Firmicutes	Clostridia	Clostridiales	Ruminococcaceae			0	0	0	4.6	5
114400	Firmicutes	Clostridia	Clostridiales	Ruminococcaceae			0	0	0	8	7.6
New.ReferenceOTU524	Bacteroidetes	Bacteroidia	Bacteroidales	Rikenellaceae			0	0	0	4.4	3.6
4304867	Firmicutes	Clostridia	Clostridiales	Lachnospiraceae			0	0	0	5.2	5.6
351823	Firmicutes	Clostridia	Clostridiales	Christensenellaceae			0	0	0	6.4	4.8
111325	Firmicutes	Clostridia	Clostridiales				0	8.66667	3.8	0.4	0.4
New.ReferenceOTU27	Proteobacteria	Deltaproteobacteria	Desulfovibrionales	Desulfovibrionaceae	Desulfovibrio		12.6	0	0	0	0
4413676	Firmicutes	Clostridia	Clostridiales	Veillonellaceae			8.2	0	0	0.2	0
369416	Firmicutes	Clostridia	Clostridiales	Ruminococcaceae			0.4	0	0	6.4	6
New.CleanUp.ReferenceOTU199	Firmicutes	Clostridia	Clostridiales				0	13.6667	8.2	1	0
352999	Firmicutes	Clostridia	Clostridiales	Lachnospiraceae			0.2	3	3.4	0	0
300528	Chloroflexi	Anaerolineae	Anaerolineales	Anaerolinaceae	SHD-231		1	4	5.4	0.4	0.4
294390	Firmicutes	Clostridia	Clostridiales	Ruminococcaceae			0	0	0	4.8	6
291434	Bacteroidetes	Bacteroidia	Bacteroidales				0	0	0	11	6.2
109753	Firmicutes	Clostridia	Clostridiales	Ruminococcaceae			1.4	4.66667	4	0	0
99264	Bacteroidetes	Bacteroidia	Bacteroidales	Prevotellaceae	Prevotella		20.8	0	0	0	0
New.CleanUp.ReferenceOTU247	Tenericutes	Mollicutes	RF39				0	0	0	6	6
655812	Bacteroidetes	Bacteroidia	Bacteroidales	[Paraprevotellaceae]	YRC22		15.6	1	0.6	0	0.4
351498	Firmicutes	Clostridia	Clostridiales	[Mogibacteriaceae]			0	7.33333	7.2	1	0
289157	Firmicutes	Clostridia	Clostridiales				0	2.66667	4.6	0.4	0.2
4468739	Firmicutes	Clostridia	Clostridiales	Clostridiaceae	Clostridium		0	0	0	3	9.2
4437823	Firmicutes	Clostridia	Clostridiales	Lachnospiraceae			0	5.66667	10	1.2	0.4
730733	Bacteroidetes	Bacteroidia	Bacteroidales	Rikenellaceae			0	0	0	12.4	9
620926	Bacteroidetes	Bacteroidia	Bacteroidales				0	0	0	7	10.6
330660	Bacteroidetes	Bacteroidia	Bacteroidales				0	0	0	9.4	8
319450	Firmicutes	Clostridia	Clostridiales	Ruminococcaceae			0.6	8.66667	12	1.4	1.2
305924	Firmicutes	Clostridia	Clostridiales	Lachnospiraceae			0	0	0	7.2	8.6
296633	Firmicutes	Clostridia	Clostridiales	Ruminococcaceae			0	0	0	6.2	6.2
288889	Bacteroidetes	Bacteroidia	Bacteroidales	Bacteroidaceae	5-7N15		0	0	0	6.8	11
174033	Firmicutes	Clostridia	Clostridiales				0	4	4.2	0.2	0.2
New.CleanUp.ReferenceOTU27	Chloroflexi	Anaerolineae	Anaerolineales	Anaerolinaceae	SHD-231		0	5.66667	3.8	0.2	0
288779	Firmicutes	Clostridia	Clostridiales	Ruminococcaceae			0	0	0	8.8	5.8
New.CleanUp.ReferenceOTU615	Bacteroidetes	Bacteroidia	Bacteroidales				0	0	0	8.8	11.8
632932	Firmicutes	Clostridia	Clostridiales				0.4	0	0	4	9
294536	Bacteroidetes	Bacteroidia	Bacteroidales	BS11			17.8	0	0	0	0
259270	Firmicutes	Erysipelotrichi	Erysipelotrichales	Erysipelotrichaceae	p-75-a5		1	6.66667	6	1	1
316582	Firmicutes	Clostridia	Clostridiales	[Mogibacteriaceae]	Mogibacterium		0	10.3333	6.4	1.6	0.4
294315	Bacteroidetes	Bacteroidia	Bacteroidales				0	0	0	8.6	7.8
214336	Bacteroidetes	Bacteroidia	Bacteroidales	Prevotellaceae	Prevotella		21.4	0	0	0	0
New.ReferenceOTU731	Firmicutes	Clostridia	Clostridiales	Christensenellaceae			0.8	0	0	9.8	5
277047	Tenericutes	Mollicutes	RF39				0	0	0	4.2	5.8
New.ReferenceOTU600	Firmicutes	Clostridia	Clostridiales				0	2.66667	6.4	0.2	0
310222	Firmicutes	Clostridia	Clostridiales				0	0	0	5.2	3.6
326382	Bacteroidetes	Bacteroidia	Bacteroidales	Bacteroidaceae	5-7N15		0	0	0	7	7.2
New.CleanUp.ReferenceOTU117	Actinobacteria	Coriobacteriia	Coriobacteriales	Coriobacteriaceae			0	4.33333	7.2	0.4	0
New.CleanUp.ReferenceOTU111	Firmicutes	Clostridia	Clostridiales	[Mogibacteriaceae]			0.4	1	3	0	0
4324041	Bacteroidetes	Bacteroidia	Bacteroidales	RF16			0	0	0	5.6	5
511433	Firmicutes	Clostridia	Clostridiales				0	0	0	4.4	6.6
194322	Firmicutes	Clostridia	Clostridiales	Ruminococcaceae			0	3	5.6	0	1.4
4443082	Bacteroidetes	Bacteroidia	Bacteroidales				0	0	0	5.8	5
2883968	Firmicutes	Clostridia	Clostridiales				1	12.3333	10.4	0.8	0.6
352691	Tenericutes	Mollicutes	RF39				1.2	10	12.4	0.6	0
295835	Firmicutes	Clostridia	Clostridiales				0	0	0	3.8	3
288814	Firmicutes	Clostridia	Clostridiales	Ruminococcaceae			0	0	0	2.8	5.6
1517779	Bacteroidetes	Bacteroidia	Bacteroidales	Rikenellaceae			0	0	0	4.6	4.2
341449	Firmicutes	Clostridia	Clostridiales	Lachnospiraceae			0	3.33333	6.4	1	0
298545	Bacteroidetes	Bacteroidia	Bacteroidales	Bacteroidaceae	5-7N15		0	0	0	3.6	5
2201	Bacteroidetes	Bacteroidia	Bacteroidales	[Paraprevotellaceae]			18.8	0	0	0	0
339375	Spirochaetes	Spirochaetes	Spirochaetales	Spirochaetaceae	Treponema		0	0	0	3.8	3
298019	Bacteroidetes	Bacteroidia	Bacteroidales				0	0	0	4.6	4.8
297256	Firmicutes	Clostridia	Clostridiales	Ruminococcaceae			2.4	0	0	6.2	7.6
296496	Firmicutes	Clostridia	Clostridiales	Ruminococcaceae			0	0	0	5.8	5.6
831218	Tenericutes	Mollicutes	Anaeroplasmatales	Anaeroplasmataceae	Anaeroplasma		10.6	0	0	0	0
544734	Firmicutes	Clostridia	Clostridiales	Ruminococcaceae			0	0	0	4	8.2
216010	Firmicutes	Clostridia	Clostridiales	[Mogibacteriaceae]			0	0	0	8.2	7.2
316412	Bacteroidetes	Bacteroidia	Bacteroidales				13	0	1.2	0	0.2
New.ReferenceOTU313	Bacteroidetes	Bacteroidia	Bacteroidales				11	0	0	0	0
New.CleanUp.ReferenceOTU507	Bacteroidetes	Bacteroidia	Bacteroidales				0	0	0	8.4	9
4303852	Firmicutes	Clostridia	Clostridiales	Ruminococcaceae			18.2	0	0.2	0.4	0.2
324099	Firmicutes	Clostridia	Clostridiales	Christensenellaceae			0.2	6.66667	6.8	0.2	0
289500	Bacteroidetes	Bacteroidia	Bacteroidales				8.2	0	0	0	0
272580	Bacteroidetes	Bacteroidia	Bacteroidales	Prevotellaceae	Prevotella		13.8	0.333333	0	0	0
254969	Bacteroidetes	Bacteroidia	Bacteroidales				19.2	0	0	0	0
4380006	Firmicutes	Clostridia	Clostridiales	[Mogibacteriaceae]			0	0	0	6	7.6
4341679	Firmicutes	Clostridia	Clostridiales	Ruminococcaceae			0	0	0	5.8	3.4
240168	Bacteroidetes	Bacteroidia	Bacteroidales	BS11			14	0	0	0	0
New.ReferenceOTU391	Firmicutes	Clostridia	Clostridiales	Ruminococcaceae			0	0	0	5.4	4.6
4449897	Firmicutes	Clostridia	Clostridiales				0	0	0	4.2	4.6
324863	Firmicutes	Clostridia	Clostridiales	Lachnospiraceae			0.4	2.66667	6.2	0.2	0.2
New.ReferenceOTU709	Proteobacteria	Deltaproteobacteria	Desulfovibrionales	Desulfovibrionaceae	Desulfovibrio		10.8	0	0	0	0
348074	Tenericutes	Mollicutes	Anaeroplasmatales	Anaeroplasmataceae	Anaeroplasma		9.6	0	0	0	0
319704	Tenericutes	Mollicutes	RF39				3	0	0	4	4
212051	Bacteroidetes	Bacteroidia	Bacteroidales	Prevotellaceae	Prevotella		15.6	0	0.2	0	0
211557	Bacteroidetes	Bacteroidia	Bacteroidales	Prevotellaceae	Prevotella		5	0	0	0	0
131100	Firmicutes	Clostridia	Clostridiales	Lachnospiraceae			0	2.33333	3.8	0.2	0
11376	Actinobacteria	Coriobacteriia	Coriobacteriales	Coriobacteriaceae			0	8.66667	11.4	1.6	0.2
New.CleanUp.ReferenceOTU49	Firmicutes	Clostridia	Clostridiales				0	8.66667	7.6	1	0
4388835	Firmicutes	Clostridia	Clostridiales	Ruminococcaceae			0	0	0	6.4	6
306528	Firmicutes	Clostridia	Clostridiales	Ruminococcaceae			9.2	0	0	0.2	0
New.ReferenceOTU95	Bacteroidetes	Bacteroidia	Bacteroidales				16.6	0	0	0	0
4481624	Firmicutes	Clostridia	Clostridiales	Clostridiaceae	Clostridium		0	0	0	4.8	2.8
1591458	Bacteroidetes	Bacteroidia	Bacteroidales				17	0	0	0	0
746079	Bacteroidetes	Bacteroidia	Bacteroidales				6.8	0	0	0.4	0.4
166629	Firmicutes	Clostridia	Clostridiales	Christensenellaceae			0	2.66667	4.4	0.8	1
4303551	Firmicutes	Clostridia	Clostridiales	Lachnospiraceae			17.4	0	0	0	0
509073	Bacteroidetes	Bacteroidia	Bacteroidales	Bacteroidaceae	5-7N15		0	0	0	6	6
214383	Firmicutes	Clostridia	Clostridiales	Veillonellaceae			6	0	0	0	0
101011	Firmicutes	Clostridia	Clostridiales				0	2	5.6	1.2	0.2
4348664	Bacteroidetes	Bacteroidia	Bacteroidales	Rikenellaceae			0	0	0	5.4	5.8
937075	Firmicutes	Clostridia	Clostridiales				1.2	0	0	3	3.4
New.ReferenceOTU60	Bacteroidetes	Bacteroidia	Bacteroidales				12.6	0	0	0	0
707585	Bacteroidetes	Bacteroidia	Bacteroidales				8	0	0	0	0
326265	Firmicutes	Clostridia	Clostridiales	Ruminococcaceae			0	0	0	5.8	3.6
236097	Firmicutes	Clostridia	Clostridiales	Lachnospiraceae			0.2	1.33333	3.4	0	0
4446740	Firmicutes	Clostridia	Clostridiales	Ruminococcaceae			6.8	0	0	0	0.4
566154	Actinobacteria	Coriobacteriia	Coriobacteriales	Coriobacteriaceae	Atopobium		0	1.33333	2.4	0	0.4
325281	Tenericutes	Mollicutes	RF39				1	10	8.8	0.8	0.6
318446	Firmicutes	Clostridia	Clostridiales	Lachnospiraceae	Dorea		0	0	0	3.2	4.8
110910	Firmicutes	Clostridia	Clostridiales	Christensenellaceae			0	6.66667	3.8	0.4	0.6
102084	Bacteroidetes	Bacteroidia	Bacteroidales	Prevotellaceae	Prevotella		17	0	0	0	0
New.ReferenceOTU122	SR1						12.2	0	0	0	0
4450291	Firmicutes	Clostridia	Clostridiales	Ruminococcaceae			0	0	0	3.2	4.6
749770	Verrucomicrobia	Verrucomicrobiae	Verrucomicrobiales	Verrucomicrobiaceae	Akkermansia		0	0	0	3.4	3.2
697251	Firmicutes	Clostridia	Clostridiales	Veillonellaceae			7	0	1	0	0
297150	Firmicutes	Clostridia	Clostridiales	Lachnospiraceae	Dorea		0	0	0	8.2	4
84779	Firmicutes	Clostridia	Clostridiales	Ruminococcaceae	Ruminococcus		4.8	1.33333	0.6	0	0
4401628	Firmicutes	Clostridia	Clostridiales	Lachnospiraceae			6.4	0	0	0	0
331526	Verrucomicrobia	[Pedosphaerae]	[Pedosphaerales]	R4-41B			9.2	0	0	0	0
4374112	Firmicutes	Clostridia	Clostridiales	Ruminococcaceae			0	0	0	5.8	8
1129180	Firmicutes	Clostridia	Clostridiales				0	0	0	4.2	4.2
835896	Bacteroidetes	Bacteroidia	Bacteroidales	Prevotellaceae	Prevotella		10.2	0.333333	0	0	0
338111	Firmicutes	Clostridia	Clostridiales	Ruminococcaceae			0	0	0	4	4.6
298491	Firmicutes	Clostridia	Clostridiales	Ruminococcaceae	Ruminococcus		0	0	0	4.2	9.2
New.CleanUp.ReferenceOTU180	Firmicutes	Clostridia	Clostridiales				0	3	8.4	1.2	0
3903651	Firmicutes	Clostridia	Clostridiales	Ruminococcaceae	Oscillospira		0	0	0	4.2	4.4
741727	Bacteroidetes	Bacteroidia	Bacteroidales	[Paraprevotellaceae]	YRC22		10.6	0.333333	0.6	0	0.2
655466	Verrucomicrobia	Verruco-5	WCHB1-41	RFP12			7.4	0.333333	1.6	0	0.6
263180	Firmicutes	Clostridia	Clostridiales	Ruminococcaceae			1	4.66667	5.8	0	0.4
259498	Bacteroidetes	Bacteroidia	Bacteroidales	Prevotellaceae	Prevotella		3.8	0	0	0	0
New.CleanUp.ReferenceOTU69	Planctomycetes	Planctomycetia	Pirellulales	Pirellulaceae			0.2	4	8.2	0	1
New.CleanUp.ReferenceOTU623	Firmicutes	Clostridia	Clostridiales	Ruminococcaceae			0	0	0	2.6	5.8
New.CleanUp.ReferenceOTU124	Firmicutes	Clostridia	Clostridiales	Lachnospiraceae			0	5.66667	3.4	0.2	0
New.CleanUp.ReferenceOTU1	Bacteroidetes	Bacteroidia	Bacteroidales				16.2	0	0	0	0
2424365	Firmicutes	Clostridia	Clostridiales	Lachnospiraceae	Butyrivibrio		6	0.333333	0.8	0	0
784184	Firmicutes	Clostridia	Clostridiales	Ruminococcaceae			0	0	0	4.2	6.2
569237	Bacteroidetes	Bacteroidia	Bacteroidales	[Paraprevotellaceae]	CF231		15.6	0	0	0	0
290532	Firmicutes	Clostridia	Clostridiales	Ruminococcaceae			0.2	5.33333	4.8	0	0.2
New.ReferenceOTU135	Firmicutes	Clostridia	Clostridiales				14	0	0	0	0
112771	Firmicutes	Clostridia	Clostridiales				0.4	4	6	0.4	1.4
84124	Firmicutes	Clostridia	Clostridiales	Veillonellaceae	Succiniclasticum		13.8	0	0.2	0	0
New.ReferenceOTU523	Actinobacteria	Coriobacteriia	Coriobacteriales	Coriobacteriaceae	Adlercreutzia		0	10	6.4	0.8	0.8
4306461	Elusimicrobia	Elusimicrobia	Elusimicrobiales	Elusimicrobiaceae			8	0	0	1.6	1
291709	Firmicutes	Clostridia	Clostridiales				0	0	0	2.2	3.4
4463575	Firmicutes	Clostridia	Clostridiales	Ruminococcaceae			0	0	0	5.2	3
294747	Firmicutes	Clostridia	Clostridiales	Ruminococcaceae			0	0	0	4.6	5
291348	Firmicutes	Clostridia	Clostridiales	Ruminococcaceae	Oscillospira		0	0	0	4	5.4
206578	Firmicutes	Clostridia	Clostridiales	Lachnospiraceae			5.4	0	0	0	0
109402	Bacteroidetes	Bacteroidia	Bacteroidales				7	1.33333	0.4	0	0
4319107	Firmicutes	Clostridia	Clostridiales				8.8	0	0	0.4	1
328246	Bacteroidetes	Bacteroidia	Bacteroidales	Prevotellaceae	Prevotella		13.4	0	0.2	0	0
300041	Firmicutes	Clostridia	Clostridiales	Ruminococcaceae			0	0	0	3.6	2.2
287880	Firmicutes	Clostridia	Clostridiales				0	0	0	3.4	4.6
New.ReferenceOTU494	Tenericutes	Mollicutes	RF39				0.6	8.33333	5.4	1	0.2
New.ReferenceOTU374	Firmicutes	Clostridia	Clostridiales				1	0	0	1.8	4.2
4298017	Firmicutes	Clostridia	Clostridiales	Ruminococcaceae			0	0	0	2.8	3
New.CleanUp.ReferenceOTU63	Firmicutes	Clostridia	Clostridiales	Ruminococcaceae	Ruminococcus		0	4.66667	6.2	0.4	0.6
297237	Firmicutes	Clostridia	Clostridiales	Ruminococcaceae			0	0	0	4	4.4
296320	Actinobacteria	Coriobacteriia	Coriobacteriales	Coriobacteriaceae	Atopobium		0	2	3.4	0.2	0.2
110136	Firmicutes	Clostridia	Clostridiales	Dehalobacteriaceae	Dehalobacterium		1	3.33333	6	0.4	0.2
New.ReferenceOTU119	Bacteroidetes	Bacteroidia	Bacteroidales				14.2	0	0	0	0
4315788	Firmicutes	Clostridia	Clostridiales	Ruminococcaceae			0	0	0	6.6	5.2
289774	Firmicutes	Clostridia	Clostridiales	Ruminococcaceae			0	0	0	2.8	2.2
207610	Firmicutes	Clostridia	Clostridiales	Lachnospiraceae			0.2	4.66667	8	0	0.4
4464173	Firmicutes	Clostridia	Clostridiales				0	0	0	2.6	4.8
4431229	Firmicutes	Clostridia	Clostridiales	Veillonellaceae			3	0	0.2	0	0.4
4315473	Bacteroidetes	Bacteroidia	Bacteroidales	BS11			8.6	0	0	0	0
732053	Bacteroidetes	Bacteroidia	Bacteroidales				9.6	0	0	0	0
301305	Bacteroidetes	Bacteroidia	Bacteroidales				13	0	0	0	0
272513	Firmicutes	Clostridia	Clostridiales	Ruminococcaceae			0	1	2.2	0.6	0
New.ReferenceOTU236	Actinobacteria	Coriobacteriia	Coriobacteriales	Coriobacteriaceae			0	2.66667	1.6	0	0
349546	Firmicutes	Clostridia	Clostridiales	Lachnospiraceae			0	2.66667	5.2	0.4	0.2
335853	Spirochaetes	MVP-15	PL-11B10				12.6	0	0	0	0
290320	SR1						9	0	0	0	0
238635	Firmicutes	Clostridia	Clostridiales	Dehalobacteriaceae	Dehalobacterium		0.4	5.33333	7	0.4	0.2
New.CleanUp.ReferenceOTU504	Firmicutes	Clostridia	Clostridiales	Ruminococcaceae			0	0	0	4.2	3.6
269674	Verrucomicrobia	Verruco-5	WCHB1-41	RFP12			11	0	0.4	0.6	0
New.ReferenceOTU573	Firmicutes	Clostridia	Clostridiales	[Mogibacteriaceae]			0	4	8	0	0
New.CleanUp.ReferenceOTU410	Actinobacteria	Coriobacteriia	Coriobacteriales	Coriobacteriaceae			0	4.66667	6.8	1	0.4
4449898	Firmicutes	Clostridia	Clostridiales	Ruminococcaceae			0	0	0	4.4	5.4
4440301	Bacteroidetes	Bacteroidia	Bacteroidales	Rikenellaceae			0	0	0	8.8	4.2
4378907	Firmicutes	Clostridia	Clostridiales	Ruminococcaceae			0	0	0	2.8	2.8
4264281	Actinobacteria	Actinobacteria	Actinomycetales	Nocardiopsaceae			0	7	5.2	0	0
727924	Spirochaetes	Spirochaetes	Spirochaetales	Spirochaetaceae	Treponema		9.2	0	0	0	0
339252	Firmicutes	Clostridia	Clostridiales	Ruminococcaceae			8.4	0	0	0	0
315831	Firmicutes	Clostridia	Clostridiales	[Mogibacteriaceae]			0	0	0	2	1.6
288168	Firmicutes	Clostridia	Clostridiales				0	0	0	4.6	4.8
New.ReferenceOTU5	Bacteroidetes	Bacteroidia	Bacteroidales	[Paraprevotellaceae]			10.2	0	0	0	0
New.ReferenceOTU45	Bacteroidetes	Bacteroidia	Bacteroidales				8	0	0	0	0
4393499	Firmicutes	Clostridia	Clostridiales	Ruminococcaceae			0	0	0	3.8	5.8
4374114	Firmicutes	Clostridia	Clostridiales	Ruminococcaceae			0	0	0	5.4	2.8
3308041	Firmicutes	Clostridia	Clostridiales				0	0	0	4.4	2.8
303313	Firmicutes	Clostridia	Clostridiales	Lachnospiraceae	Blautia		0	1.66667	2	0.2	0
300870	Firmicutes	Clostridia	Clostridiales	Ruminococcaceae			0	0	0	3.8	5
288652	Bacteroidetes	Bacteroidia	Bacteroidales				0	0	0	4.2	3.4
167205	Bacteroidetes	Bacteroidia	Bacteroidales	Prevotellaceae	Prevotella		13.2	0	0	0	0
New.ReferenceOTU377	Bacteroidetes	Bacteroidia	Bacteroidales	Rikenellaceae			0	0	0	3.2	4
New.CleanUp.ReferenceOTU619	Firmicutes	Clostridia	Clostridiales	Ruminococcaceae			0	0	0	2.8	2.6
New.CleanUp.ReferenceOTU534	Firmicutes	Clostridia	Clostridiales				0	0	0	3	4
New.CleanUp.ReferenceOTU340	Bacteroidetes	Bacteroidia	Bacteroidales	Rikenellaceae			0	0	0	7.4	4.8
1579253	Lentisphaerae	[Lentisphaeria]	Victivallales	Victivallaceae			0	0	0	3.4	4.6
330931	Firmicutes	Clostridia	Clostridiales				0	7.33333	7.4	0	0.2
207085	Bacteroidetes	Bacteroidia	Bacteroidales				12.2	0	0	0	0
4385646	Bacteroidetes	Bacteroidia	Bacteroidales	Porphyromonadaceae	Paludibacter		0	0	0	3	5.4
300285	Firmicutes	Clostridia	Clostridiales	[Mogibacteriaceae]			0	1.66667	1.2	0.2	0
275194	Firmicutes	Clostridia	Clostridiales				2.2	2.33333	6	0	0
263252	Firmicutes	Clostridia	Clostridiales	Ruminococcaceae			0	0	0	3.6	2.2
4453921	Spirochaetes	Spirochaetes	Spirochaetales	Spirochaetaceae	Treponema		4.6	0	0	0	0
4311537	Firmicutes	Clostridia	Clostridiales	Ruminococcaceae			0	0	0	2.8	6.8
344512	Firmicutes	Clostridia	Clostridiales				0	0	0	6.4	5.4
340940	Firmicutes	Clostridia	Clostridiales	Ruminococcaceae			0	0	0	4.2	3.6
307197	Bacteroidetes	Bacteroidia	Bacteroidales	Prevotellaceae	Prevotella		7.8	0	0	0	0
302655	Firmicutes	Erysipelotrichi	Erysipelotrichales	Erysipelotrichaceae			0	0	0	4	2.2
300911	Verrucomicrobia	Verrucomicrobiae	Verrucomicrobiales	Verrucomicrobiaceae	Akkermansia		0	0	0	2.4	4.8
288445	Bacteroidetes	Bacteroidia	Bacteroidales	Bacteroidaceae	5-7N15		0	0	0	3.6	6.4
268684	Tenericutes	Mollicutes	Anaeroplasmatales	Anaeroplasmataceae	Anaeroplasma		7.2	0	0	0	0
212167	Bacteroidetes	Bacteroidia	Bacteroidales	Prevotellaceae	Prevotella		11	0	0	0	0
New.ReferenceOTU75	Bacteroidetes	Bacteroidia	Bacteroidales	[Paraprevotellaceae]	CF231		10.4	0	0	0	0
New.CleanUp.ReferenceOTU901	Bacteroidetes	Bacteroidia	Bacteroidales	[Odoribacteraceae]	Odoribacter		0	0	0	3.8	2.8
New.CleanUp.ReferenceOTU349	Firmicutes	Erysipelotrichi	Erysipelotrichales	Erysipelotrichaceae			0	0	0	4.6	6
3060611	Firmicutes	Clostridia	Clostridiales				0	0	0	5.2	2.4
591464	Firmicutes	Clostridia	Clostridiales				0	0	0	3.2	1.8
568719	Actinobacteria	Coriobacteriia	Coriobacteriales	Coriobacteriaceae			0	5.66667	3.4	0	0
291630	Firmicutes	Clostridia	Clostridiales	Ruminococcaceae			0	0	0	2	1.6
111293	Firmicutes	Clostridia	Clostridiales				0	1.66667	3	0.6	0.8
New.CleanUp.ReferenceOTU794	Firmicutes	Clostridia	Clostridiales				0	0	0	2.4	7.6
New.CleanUp.ReferenceOTU256	Firmicutes	Clostridia	Clostridiales				0	8.33333	4.6	0	0.4
207296	Bacteroidetes	Bacteroidia	Bacteroidales				10.6	0	0	0	0
143138	Bacteroidetes	Bacteroidia	Bacteroidales	[Paraprevotellaceae]			2	0	0	0	0
New.ReferenceOTU302	Proteobacteria	Alphaproteobacteria	RF32				4	0	0	1	0.6
4359834	Firmicutes	Clostridia	Clostridiales				2	3.66667	3.8	0.4	0.4
4324036	Bacteroidetes	Bacteroidia	Bacteroidales	S24-7			0	0	0	4.4	6.4
817062	Firmicutes	Clostridia	Clostridiales	Ruminococcaceae			9.8	0	0	0	0
798164	Firmicutes	Clostridia	Clostridiales				0	0	0	1.6	2.6
594119	Firmicutes	Clostridia	Clostridiales	Ruminococcaceae			0	0	0	1.2	4.6
572825	Bacteroidetes	Bacteroidia	Bacteroidales	Prevotellaceae	Prevotella		10.2	0	0	0	0
303448	Firmicutes	Clostridia	Clostridiales	Ruminococcaceae	Ruminococcus	flavefaciens	11.8	0	0.2	0	0
288487	Firmicutes	Clostridia	Clostridiales	Ruminococcaceae			0	0	0	3.8	2.4
1591493	Bacteroidetes	Bacteroidia	Bacteroidales				9.8	0	0	0	0
336156	Firmicutes	Erysipelotrichi	Erysipelotrichales	Erysipelotrichaceae	L7A+AF8-E11		0	3.33333	5	0.6	0
335301	Firmicutes	Clostridia	Clostridiales	Lachnospiraceae			0	6.66667	6.6	0	0
254248	Bacteroidetes	Bacteroidia	Bacteroidales				11.8	0	0	0	0
165462	Bacteroidetes	Bacteroidia	Bacteroidales	Prevotellaceae	Prevotella		9.2	0	0	0	0
132122	Firmicutes	Clostridia	Clostridiales				0	0	0	3.2	4.2
106778	Proteobacteria	Alphaproteobacteria	Rickettsiales				11.4	0	0	0	0
New.ReferenceOTU63	Verrucomicrobia	Verruco-5	WCHB1-41	RFP12			9.2	0	0	0	0
812218	Firmicutes	Clostridia	Clostridiales	Lachnospiraceae			0	5	4.4	0.4	0
662852	Firmicutes	Clostridia	Clostridiales				0	4.33333	2.6	0.8	0
New.ReferenceOTU621	Actinobacteria	Coriobacteriia	Coriobacteriales	Coriobacteriaceae			0.2	4.66667	6.4	1.2	0
New.ReferenceOTU131	Bacteroidetes	Bacteroidia	Bacteroidales	Prevotellaceae	Prevotella		2.4	0	0	0	0
4410988	Firmicutes	Clostridia	Clostridiales	Ruminococcaceae			0	0	0	1.6	4.8
4326861	Firmicutes	Clostridia	Clostridiales				3	3.33333	3.2	0.6	0
583584	Firmicutes	Clostridia	Clostridiales	Lachnospiraceae			0	4.33333	2.4	0.2	0.4
317438	Firmicutes	Clostridia	Clostridiales				0	3	6	0.4	0
303279	Firmicutes	Clostridia	Clostridiales	Ruminococcaceae	Oscillospira		0	0	0	3.2	1.6
296272	Firmicutes	Clostridia	Clostridiales	[Mogibacteriaceae]			0	0	0	5.2	2.8
255603	Firmicutes	Clostridia	Clostridiales	Lachnospiraceae			0	4.33333	3	0.2	0.2
New.ReferenceOTU87	Bacteroidetes	Bacteroidia	Bacteroidales	Prevotellaceae	Prevotella		9.6	0	0	0	0
295258	Firmicutes	Clostridia	Clostridiales	Ruminococcaceae			0	0	0	2.6	3.8
294457	Firmicutes	Clostridia	Clostridiales	Ruminococcaceae			0	0	0	1.4	2
291494	Firmicutes	Clostridia	Clostridiales				0.4	2	4.8	0.2	0.2
258636	Verrucomicrobia	Verruco-5	WCHB1-41	RFP12			5	0	0.6	0.6	0.4
103742	Bacteroidetes	Bacteroidia	Bacteroidales				7.8	0	0	0	0
84120	Bacteroidetes	Bacteroidia	Bacteroidales				8.8	0	0	0	0
New.ReferenceOTU172	Firmicutes	Clostridia	Clostridiales	Veillonellaceae			8.2	0	0	0	0
New.CleanUp.ReferenceOTU212	Firmicutes	Erysipelotrichi	Erysipelotrichales	Erysipelotrichaceae	Bulleidia		0	2.33333	4	0.2	0.8
758489	Spirochaetes	Spirochaetes	Spirochaetales	Spirochaetaceae	Treponema		7.8	0	0	0	0
580633	Firmicutes	Clostridia	Clostridiales	[Mogibacteriaceae]			0	1.33333	5.2	0	0
349892	Tenericutes	Mollicutes	RF39				2	2	6.6	0.4	0.2
162741	Bacteroidetes	Bacteroidia	Bacteroidales				7.6	0	0	0	0
New.CleanUp.ReferenceOTU753	Firmicutes	Clostridia	Clostridiales				0	6.33333	5.6	0.4	0
New.CleanUp.ReferenceOTU113	Actinobacteria	Coriobacteriia	Coriobacteriales	Coriobacteriaceae			0	8.66667	5	0.6	0
579431	Firmicutes	Clostridia	Clostridiales	Lachnospiraceae			6	0	0	0	0
527059	Firmicutes	Clostridia	Clostridiales	Lachnospiraceae	Butyrivibrio		0	2	3	0	0
300466	Bacteroidetes	Bacteroidia	Bacteroidales	[Barnesiellaceae]			0	0	0	2.4	2.2
244032	Cyanobacteria	4C0d-2	YS2				4.6	1.33333	2.4	0.4	0.2
151841	Bacteroidetes	Bacteroidia	Bacteroidales				4.6	0.666667	0	0	0
New.ReferenceOTU17	Firmicutes	Clostridia	Clostridiales	Veillonellaceae			5.6	0	0	0	0
New.CleanUp.ReferenceOTU569	Firmicutes	Clostridia	Clostridiales	[Mogibacteriaceae]			0	2	1.2	0	0
New.CleanUp.ReferenceOTU151	Firmicutes	Clostridia	Clostridiales	Ruminococcaceae			0.4	3.66667	2.6	0.6	0.2
4480841	Firmicutes	Clostridia	Clostridiales	Ruminococcaceae			0	0	0	2.8	3.4
4457480	Firmicutes	Clostridia	Clostridiales	Ruminococcaceae			0.4	0	0	3.2	2
310111	Bacteroidetes	Bacteroidia	Bacteroidales	Prevotellaceae	Prevotella		7.6	0	0	0	0
306219	Bacteroidetes	Bacteroidia	Bacteroidales				3.8	0.666667	0.2	0	0
303271	Bacteroidetes	Bacteroidia	Bacteroidales				10.6	0	0	0	0
301161	Firmicutes	Clostridia	Clostridiales	Ruminococcaceae			0	0	0	2.4	4
294548	Firmicutes	Clostridia	Clostridiales	Ruminococcaceae			0	0	0	2.8	2.2
261680	Bacteroidetes	Bacteroidia	Bacteroidales	BS11			6.2	0	0	0	0
47100	Firmicutes	Clostridia	Clostridiales				0	0	0	1	3.4
New.CleanUp.ReferenceOTU1132	Firmicutes	Clostridia	Clostridiales	Ruminococcaceae			0	0	0	3.2	6
518598	Bacteroidetes	Bacteroidia	Bacteroidales	Rikenellaceae			0	0	0	3.2	2.8
338487	Firmicutes	Clostridia	Clostridiales	Lachnospiraceae			0	0	0	2.4	1.8
99392	Bacteroidetes	Bacteroidia	Bacteroidales				8.6	0	0.2	0	0
2127	Bacteroidetes	Bacteroidia	Bacteroidales	Prevotellaceae	Prevotella		10.4	0	0	0	0
New.CleanUp.ReferenceOTU531	Firmicutes	Clostridia	Clostridiales	Ruminococcaceae			0	0	0	0.6	2
292227	Bacteroidetes	Bacteroidia	Bacteroidales	Prevotellaceae	Prevotella		10.2	0	0	0	0
107768	Firmicutes	Clostridia	Clostridiales				10	0	0	0	0
New.CleanUp.ReferenceOTU274	Firmicutes	Clostridia	Clostridiales	Lachnospiraceae			0	2.33333	6.6	0	0
4315398	Firmicutes	Clostridia	Clostridiales	Ruminococcaceae			0	0	0	3.4	3
341263	Firmicutes	Clostridia	Clostridiales	Ruminococcaceae			0	0	0	2.4	4.6
300121	Firmicutes	Clostridia	Clostridiales	Ruminococcaceae			0	0	0	2	5
297418	Firmicutes	Clostridia	Clostridiales	Ruminococcaceae			0	0	0	3.2	3.6
185222	Firmicutes	Clostridia	Clostridiales	Clostridiaceae			0	0	0	3.4	1.4
183715	Firmicutes	Clostridia	Clostridiales	Ruminococcaceae			0.4	0	0	2	2.6
New.CleanUp.ReferenceOTU313	Actinobacteria	Coriobacteriia	Coriobacteriales	Coriobacteriaceae	Adlercreutzia		0	1.66667	1.8	0.4	0
New.CleanUp.ReferenceOTU246	Firmicutes	Clostridia	Clostridiales	Lachnospiraceae			0	3	3.8	0	0.2
4468384	Firmicutes	Clostridia	Clostridiales	Lachnospiraceae			0	0	0	5.2	2.8
542830	Cyanobacteria	4C0d-2	YS2				5.2	0.666667	0.6	0	0
307485	Firmicutes	Clostridia	Clostridiales	[Mogibacteriaceae]	Mogibacterium		0	0.666667	1.8	0.2	0.2
196905	Firmicutes	Clostridia	Clostridiales	Ruminococcaceae			0.4	0	0	3	2
2036	Bacteroidetes	Bacteroidia	Bacteroidales	[Paraprevotellaceae]			7.2	0.666667	0	0	0
New.ReferenceOTU237	Firmicutes	Clostridia	Clostridiales	Ruminococcaceae			0.8	0	0	1.4	2.4
New.ReferenceOTU148	Spirochaetes	Spirochaetes	Spirochaetales	Spirochaetaceae	Treponema		1.8	0	0	0	0
New.CleanUp.ReferenceOTU663	Firmicutes	Clostridia	Clostridiales	Ruminococcaceae			0.2	0	0	3	1.8
4470216	Bacteroidetes	Bacteroidia	Bacteroidales				8.8	0	0	0	0
4366523	Firmicutes	Clostridia	Clostridiales	Lachnospiraceae			0	0	0	2.8	0.8
4317000	Bacteroidetes	Bacteroidia	Bacteroidales	Bacteroidaceae			0	0	0	4	3.6
4315396	Firmicutes	Clostridia	Clostridiales	Peptococcaceae	rc4-4		0	0	0	3.6	2.4
311426	Firmicutes	Clostridia	Clostridiales	Ruminococcaceae			1.4	0	0	3.4	2
299095	Verrucomicrobia	Verruco-5	WCHB1-41	RFP12			0	0	0	1.6	3.6
255199	Firmicutes	Clostridia	Clostridiales				0	1.33333	2.2	0.4	0
251395	Firmicutes	Clostridia	Clostridiales				0	9	3.2	0.2	0.4
86520	Bacteroidetes	Bacteroidia	Bacteroidales	Prevotellaceae	Prevotella		8	0	0	0	0
New.ReferenceOTU88	Bacteroidetes	Bacteroidia	Bacteroidales				7	0	0.8	0	0
New.CleanUp.ReferenceOTU511	Actinobacteria	Coriobacteriia	Coriobacteriales	Coriobacteriaceae			0	1.33333	0.2	0	0
4314124	Firmicutes	Clostridia	Clostridiales	Clostridiaceae	Clostridium		0	0	0	3.4	4.8
1591562	Firmicutes	Erysipelotrichi	Erysipelotrichales	Erysipelotrichaceae	RFN20		6	0	0	0	0
582069	Actinobacteria	Coriobacteriia	Coriobacteriales	Coriobacteriaceae	Atopobium		0	2.66667	1	0	0
295350	Firmicutes	Clostridia	Clostridiales				6.2	0	0	0.8	1
263256	Verrucomicrobia	Verruco-5	WCHB1-41	RFP12			4	0.333333	0.8	0.2	0
813331	Verrucomicrobia	Verruco-5	WCHB1-41	RFP12			5.8	0.666667	0	0	0
772393	Firmicutes	Clostridia	Clostridiales	Christensenellaceae			4.2	0	0	0	0
748872	Proteobacteria	Deltaproteobacteria	Myxococcales	0319-6G20			9.2	0	0	0	0
205082	Bacteroidetes	Bacteroidia	Bacteroidales	Prevotellaceae	Prevotella		8.6	0	0.4	0	0
New.ReferenceOTU44	Bacteroidetes	Bacteroidia	Bacteroidales				2.8	0	0.2	0	0
3262505	Firmicutes	Clostridia	Clostridiales	Ruminococcaceae			0	0	0	2.2	2.4
1579250	Firmicutes	Clostridia	Clostridiales	Ruminococcaceae			0	0	0	1	3.6
591548	Firmicutes	Clostridia	Clostridiales	Ruminococcaceae			0	0	0	2.8	2
588655	Firmicutes	Erysipelotrichi	Erysipelotrichales	Erysipelotrichaceae	RFN20		8.6	0	0	0	0
538772	Bacteroidetes	Bacteroidia	Bacteroidales	Prevotellaceae	Prevotella		9	0	0	0	0
349658	Verrucomicrobia	Verruco-5	WCHB1-41	RFP12			8.2	0	0	0	0
326452	Firmicutes	Clostridia	Clostridiales	Ruminococcaceae			0	0	0	3.4	1.6
164254	Firmicutes	Clostridia	Clostridiales	Veillonellaceae			6.4	0	0	0	0
New.ReferenceOTU318	Verrucomicrobia	Verruco-5	WCHB1-41	RFP12			7.2	0	0.2	0	1.2
New.ReferenceOTU103	Verrucomicrobia	Verruco-5	WCHB1-41	RFP12			4.2	0	0.2	0.2	0
New.CleanUp.ReferenceOTU621	Firmicutes	Clostridia	Clostridiales	Ruminococcaceae			0	0	0	0.4	2
New.CleanUp.ReferenceOTU499	Firmicutes	Clostridia	Clostridiales				0	3	2.2	0	0
4468466	Firmicutes	Clostridia	Clostridiales	Ruminococcaceae	Oscillospira		0.4	0	0	3.4	2.8
4357714	Firmicutes	Clostridia	Clostridiales	Ruminococcaceae			0	0	0	3.6	3.8
590921	Tenericutes	RF3	ML615J-28				0	0	0	2.8	1.4
588427	Spirochaetes	Spirochaetes	Spirochaetales	Spirochaetaceae	Treponema		7.4	0	0	0	0
339213	Bacteroidetes	Bacteroidia	Bacteroidales	[Paraprevotellaceae]			8.4	0	0	0	0
302102	Firmicutes	Clostridia	Clostridiales	Ruminococcaceae			0	0	0	0.6	3.4
274228	Bacteroidetes	Bacteroidia	Bacteroidales	[Paraprevotellaceae]	YRC22		2	0	0.2	0	0
268183	Firmicutes	Clostridia	Clostridiales	Lachnospiraceae			0	2.33333	2	0	0.4
198826	Firmicutes	Clostridia	Clostridiales	Ruminococcaceae			0	0	0	2.8	4.6
143811	Actinobacteria	Actinobacteria	Actinomycetales	Actinomycetaceae			0	2	2	0.2	0.2
2125	Bacteroidetes	Bacteroidia	Bacteroidales	Prevotellaceae	Prevotella		8.8	0	0	0	0
4413540	Bacteroidetes	Bacteroidia	Bacteroidales				7.8	0	0	0	0
4315790	Firmicutes	Clostridia	Clostridiales	Ruminococcaceae			0	0	0	2	2.8
811615	Bacteroidetes	Bacteroidia	Bacteroidales	Prevotellaceae	Prevotella		6.4	1.33333	1.2	0.2	0
342128	Firmicutes	Clostridia	Clostridiales	Ruminococcaceae			5.8	0	0	0	0
164462	Firmicutes	Clostridia	Clostridiales	Veillonellaceae			3.8	0	0	0	0
110748	Firmicutes	Clostridia	Clostridiales	Lachnospiraceae			0	2.33333	4.6	0.2	0
107241	Bacteroidetes	Bacteroidia	Bacteroidales	BS11			6.8	0	0	0	0
New.ReferenceOTU41	Bacteroidetes	Bacteroidia	Bacteroidales	Prevotellaceae	Prevotella		7.2	0	0	0	0
New.ReferenceOTU38	Bacteroidetes	Bacteroidia	Bacteroidales	[Paraprevotellaceae]	YRC22		6.2	0	0	0	0
New.ReferenceOTU108	Firmicutes	Clostridia	Clostridiales	Ruminococcaceae			4.6	4.33333	0.8	0	0
4358322	Firmicutes	Clostridia	Clostridiales				0	0	0	2.8	4.2
4356468	Firmicutes	Clostridia	Clostridiales	Ruminococcaceae			0	0	0	3.8	2.4
291412	Bacteroidetes	Bacteroidia	Bacteroidales				8	0	0	0	0
247889	Firmicutes	Clostridia	Clostridiales				7.8	0	0	0	0
244802	Bacteroidetes	Bacteroidia	Bacteroidales				4.6	0	0	0	0
175642	Firmicutes	Clostridia	Clostridiales	Lachnospiraceae	Blautia		0	4.33333	4.4	0.2	0
New.ReferenceOTU557	Firmicutes	Clostridia	Clostridiales				7.8	0	0	0	0
New.ReferenceOTU540	Firmicutes	Clostridia	Clostridiales	Ruminococcaceae			0	0	0	1.4	2.4
New.CleanUp.ReferenceOTU814	Firmicutes	Clostridia	Clostridiales	Ruminococcaceae	Ruminococcus		0	0	0	3.6	3.4
New.CleanUp.ReferenceOTU737	Firmicutes	Clostridia	Clostridiales	Ruminococcaceae			0	0	0	1.8	2.6
New.CleanUp.ReferenceOTU1532	Firmicutes	Clostridia	Clostridiales	Ruminococcaceae			0	0	0	2.4	3.4
337362	Firmicutes	Clostridia	Clostridiales				0	2.33333	3.6	0	0
335955	Firmicutes	Clostridia	Clostridiales	Ruminococcaceae	Ruminococcus		0	5	4.6	0	0
288331	Firmicutes	Clostridia	Clostridiales	Ruminococcaceae			0	0	0	3	1.4
New.ReferenceOTU672	Tenericutes	Mollicutes	RF39				0.6	3.33333	4.6	0.4	0.2
New.ReferenceOTU489	Tenericutes	Mollicutes	Anaeroplasmatales	Anaeroplasmataceae			5.8	0	0	0	0
New.ReferenceOTU360	Bacteroidetes	Bacteroidia	Bacteroidales	[Paraprevotellaceae]	CF231		5.8	0	0.4	0	0
New.ReferenceOTU11	Bacteroidetes	Bacteroidia	Bacteroidales	Prevotellaceae	Prevotella		4.4	0	0	0	0
New.ReferenceOTU10	Bacteroidetes	Bacteroidia	Bacteroidales	[Paraprevotellaceae]			7.4	0	0.4	0	0
New.CleanUp.ReferenceOTU719	Firmicutes	Clostridia	Clostridiales	Ruminococcaceae			0	0	0	2.2	3.6
New.CleanUp.ReferenceOTU583	Firmicutes	Bacilli	Bacillales	Staphylococcaceae	Staphylococcus	sciuri	1	3.33333	4.8	0.2	0
4478501	Firmicutes	Clostridia	Clostridiales	Veillonellaceae	Selenomonas		5	0	0	0	0.4
4469167	Firmicutes	Clostridia	Clostridiales				4	0	0	0	0.2
4435326	Bacteroidetes	Bacteroidia	Bacteroidales	Bacteroidaceae			0	0	0	2.4	4.4
4369576	Firmicutes	Clostridia	Clostridiales	Ruminococcaceae			0	0	0	3.4	3
508866	Actinobacteria	Coriobacteriia	Coriobacteriales	Coriobacteriaceae			0	4.66667	3.6	0.6	0
333123	Firmicutes	Clostridia	Clostridiales	Ruminococcaceae			0	0	0	3	3.8
291518	Firmicutes	Clostridia	Clostridiales	Ruminococcaceae			0	0	0	1.6	1.8
176104	Firmicutes	Clostridia	Clostridiales	Ruminococcaceae			0	0	0	2.2	1.4
104144	Firmicutes	Clostridia	Clostridiales	Ruminococcaceae			0	0	0	2.2	2.8
New.ReferenceOTU4	Bacteroidetes	Bacteroidia	Bacteroidales	Prevotellaceae	Prevotella		7.6	0	0	0	0
New.ReferenceOTU33	Bacteroidetes	Bacteroidia	Bacteroidales				7.8	0	0	0	0
New.CleanUp.ReferenceOTU459	Firmicutes	Clostridia	Clostridiales	Lachnospiraceae			0.2	3	3.6	0.2	0
4297831	Firmicutes	Clostridia	Clostridiales				0	0	0	3	2.6
567752	Bacteroidetes	Bacteroidia	Bacteroidales	[Paraprevotellaceae]	YRC22		7.4	0	0.4	0	0
306087	Lentisphaerae	[Lentisphaeria]	Victivallales	Victivallaceae			4.2	0.333333	0	1.2	1
293999	Firmicutes	Erysipelotrichi	Erysipelotrichales	Erysipelotrichaceae	RFN20		6.2	0	0	0	0
289893	Bacteroidetes	Bacteroidia	Bacteroidales				0	0	0	3	2
152058	Bacteroidetes	Bacteroidia	Bacteroidales				6	0	0	0	0
4459184	Firmicutes	Clostridia	Clostridiales				1.6	0	0	0	0
4425648	Proteobacteria	Deltaproteobacteria	Desulfovibrionales	Desulfovibrionaceae	Desulfovibrio		0	0	0	4.8	1.6
4367232	Firmicutes	Clostridia	Clostridiales	Clostridiaceae	Clostridium		3.4	0	0.4	0	0
558603	Proteobacteria	Deltaproteobacteria	Desulfovibrionales	Desulfovibrionaceae	Desulfovibrio		3.8	0	0	0	0
547649	Firmicutes	Erysipelotrichi	Erysipelotrichales	Erysipelotrichaceae	RFN20		6.4	0	0	0	0
298616	Firmicutes	Clostridia	Clostridiales	Ruminococcaceae			0.2	0	0	3.2	2.6
203934	Bacteroidetes	Bacteroidia	Bacteroidales				5.2	0	0.4	0.2	0
New.CleanUp.ReferenceOTU747	Firmicutes	Clostridia	Clostridiales	[Mogibacteriaceae]			0	3.33333	2.8	0	0
New.CleanUp.ReferenceOTU1491	Tenericutes	Mollicutes	RF39				0	0	0	3.2	2.4
New.CleanUp.ReferenceOTU1172	Firmicutes	Clostridia	Clostridiales	Christensenellaceae			0	0	0	3.2	1
521913	Firmicutes	Clostridia	Clostridiales	Lachnospiraceae			0	0.666667	3.4	0	0
296474	Firmicutes	Clostridia	Clostridiales				0	0	0	3.6	3.8
288138	Firmicutes	Clostridia	Clostridiales				0	0	0	2	0.8
148368	Firmicutes	Clostridia	Clostridiales				0.2	1	2.2	0	0.8
New.ReferenceOTU68	Bacteroidetes	Bacteroidia	Bacteroidales	Prevotellaceae	Prevotella		6.2	0	0.6	0	0
New.CleanUp.ReferenceOTU635	Bacteroidetes	Bacteroidia	Bacteroidales				0	0	0	2	3.2
New.CleanUp.ReferenceOTU5	Firmicutes	Clostridia	Clostridiales	Lachnospiraceae			2.4	0	0	0	0
New.CleanUp.ReferenceOTU1727	Firmicutes	Clostridia	Clostridiales	Ruminococcaceae			0	0	0	4.2	2.8
4381054	Firmicutes	Clostridia	Clostridiales	Ruminococcaceae			0	0	0	2.2	2.6
824567	Firmicutes	Clostridia	Clostridiales	Lachnospiraceae			0	1.33333	2.4	0	0
651513	Bacteroidetes	Bacteroidia	Bacteroidales	Prevotellaceae	Prevotella		7	0	0.2	0	0
577671	TM7	TM7-3	CW040	F16			0	3	1.2	0	0.2
291418	Firmicutes	Clostridia	Clostridiales				0	5	2.2	0.2	0
129755	Firmicutes	Clostridia	Clostridiales	Lachnospiraceae	Butyrivibrio		0.2	1.33333	3.4	0.2	0
2037	Bacteroidetes	Bacteroidia	Bacteroidales	RF16			6.8	0.333333	0.2	0	0
New.ReferenceOTU402	Bacteroidetes	Bacteroidia	Bacteroidales				4	0	0	0	0
4412851	Bacteroidetes	Bacteroidia	Bacteroidales				6	0	0	0	0
821906	Bacteroidetes	Bacteroidia	Bacteroidales	Prevotellaceae	Prevotella		5.8	0	0	0	0
337785	Bacteroidetes	Bacteroidia	Bacteroidales	BS11			6.4	0	0	0	0
325575	Bacteroidetes	Bacteroidia	Bacteroidales				4	0	0	0	0
320289	Firmicutes	Clostridia	Clostridiales				0	0	0	2	2.8
265414	Proteobacteria	Deltaproteobacteria	Desulfovibrionales	Desulfovibrionaceae			2.2	0	0	0	0.4
254600	Firmicutes	Clostridia	Clostridiales				3.2	0.333333	0.2	0	0
133732	Firmicutes	Clostridia	Clostridiales	Lachnospiraceae			0	0.666667	4	0	0
63459	Fibrobacteres	Fibrobacteria	Fibrobacterales	Fibrobacteraceae	Fibrobacter	succinogenes	5.6	1	0.2	0	0
13813	Firmicutes	Clostridia	Clostridiales	Veillonellaceae	Selenomonas	ruminantium	5.4	0	0	0	0
New.ReferenceOTU468	Actinobacteria	Coriobacteriia	Coriobacteriales	Coriobacteriaceae			0	2	3	0	0
New.ReferenceOTU125	Tenericutes	Mollicutes	Anaeroplasmatales	Anaeroplasmataceae	Anaeroplasma		5.4	0	0	0	0
New.CleanUp.ReferenceOTU867	Fibrobacteres	Fibrobacteria	Fibrobacterales	Fibrobacteraceae	Fibrobacter	succinogenes	6.8	0	0	0	0
New.CleanUp.ReferenceOTU695	Firmicutes	Clostridia	Clostridiales	Lachnospiraceae			0	1.66667	0.6	0.2	0
New.CleanUp.ReferenceOTU183	Actinobacteria	Coriobacteriia	Coriobacteriales	Coriobacteriaceae			0	0	1.4	0	0
New.CleanUp.ReferenceOTU1004	Tenericutes	Mollicutes	RF39				0	1.66667	2.2	0.6	0
4412850	Firmicutes	Clostridia	Clostridiales	Lachnospiraceae			0.4	1.66667	3.4	0.2	0.4
664795	Firmicutes	Clostridia	Clostridiales	Ruminococcaceae			0	0	0	3	1
287592	Firmicutes	Clostridia	Clostridiales	Lachnospiraceae			0	0	0	2.2	3.8
265613	Spirochaetes	Spirochaetes	Spirochaetales	Spirochaetaceae	Treponema		6.8	0	0	0	0
New.ReferenceOTU69	Bacteroidetes	Bacteroidia	Bacteroidales	[Paraprevotellaceae]			4.8	0.666667	0.6	0	0
New.ReferenceOTU338	Tenericutes	Mollicutes	Anaeroplasmatales	Anaeroplasmataceae	Anaeroplasma		5.6	0	0	0	0
New.CleanUp.ReferenceOTU801	Firmicutes	Clostridia	Clostridiales				0	3.33333	2.6	0.2	0
New.CleanUp.ReferenceOTU715	Firmicutes	Clostridia	Clostridiales	Christensenellaceae			0	0	0	2	2.4
New.CleanUp.ReferenceOTU1186	Firmicutes	Clostridia	Clostridiales	Ruminococcaceae			0	0	0	2.6	3.8
773823	Firmicutes	Clostridia	Clostridiales	Veillonellaceae	Anaerovibrio		2.2	0	0	0	0
554600	Bacteroidetes	Bacteroidia	Bacteroidales	[Paraprevotellaceae]	YRC22		5.8	0	0.4	0	0
333189	Firmicutes	Clostridia	Clostridiales	Ruminococcaceae	Oscillospira		0	0	0	1	2
322729	Firmicutes	Clostridia	Clostridiales	Ruminococcaceae			5.2	0.333333	0.2	0	0
320633	Spirochaetes	MVP-15	PL-11B10				4.6	0	0	0	0
307297	Bacteroidetes	Bacteroidia	Bacteroidales				5.8	0	0	0	0.2
289729	Firmicutes	Clostridia	Clostridiales	Ruminococcaceae			0	0	0	2.2	3.2
275197	Firmicutes	Clostridia	Clostridiales	Ruminococcaceae			6.6	0	0	0	0
166206	Firmicutes	Clostridia	Clostridiales	Ruminococcaceae			0	1	1.8	0	0
155468	Bacteroidetes	Bacteroidia	Bacteroidales				4.6	0	0	0	0
115035	Firmicutes	Clostridia	Clostridiales	Ruminococcaceae	Oscillospira		0	0	0	1.4	3.2
2082	Bacteroidetes	Bacteroidia	Bacteroidales	Prevotellaceae	Prevotella		5.2	0	0	0	0
New.ReferenceOTU733	Firmicutes	Clostridia	Clostridiales	Ruminococcaceae			3.8	0	0	0	0
New.ReferenceOTU649	Tenericutes	Mollicutes	Anaeroplasmatales	Anaeroplasmataceae	Anaeroplasma		4.6	0	0	0	0
New.CleanUp.ReferenceOTU227	Tenericutes	Mollicutes	Anaeroplasmatales	Anaeroplasmataceae	Anaeroplasma		2	0	0	0	0
New.CleanUp.ReferenceOTU1095	Firmicutes	Clostridia	Clostridiales	Ruminococcaceae			0	0	0	2.4	2.2
New.CleanUp.ReferenceOTU1035	Firmicutes	Clostridia	Clostridiales	Peptococcaceae			0	0	0	1.6	2.8
4408503	Firmicutes	Clostridia	Clostridiales	Ruminococcaceae			0	0	0	2.2	0.8
699666	Bacteroidetes	Bacteroidia	Bacteroidales				4	0	0	0	0
513742	Firmicutes	Clostridia	Clostridiales	Ruminococcaceae			0	0	0	1.8	1
301816	Firmicutes	Clostridia	Clostridiales	Clostridiaceae	Clostridium		0	0	0	1.6	2
170775	Firmicutes	Clostridia	Clostridiales				5.4	0	0	0	0
New.ReferenceOTU659	Tenericutes	Mollicutes	Anaeroplasmatales	Anaeroplasmataceae	Anaeroplasma		1.8	0	0	0	0
New.ReferenceOTU408	Firmicutes	Clostridia	Clostridiales	Peptococcaceae			0	0	0	1.8	1.6
New.ReferenceOTU150	Bacteroidetes	Bacteroidia	Bacteroidales	[Paraprevotellaceae]			4.8	0	0	0	0
New.CleanUp.ReferenceOTU58	Spirochaetes	Spirochaetes	Spirochaetales	Spirochaetaceae	Treponema		2	0	0	0	0
4383092	Firmicutes	Clostridia	Clostridiales	Lachnospiraceae			0	0.666667	3.4	0	0
731247	Spirochaetes	Spirochaetes	Spirochaetales	Spirochaetaceae			4.8	0	0	0	0
324495	Bacteroidetes	Bacteroidia	Bacteroidales	[Paraprevotellaceae]	CF231		5.2	0	0.2	0	0
312126	Firmicutes	Clostridia	Clostridiales				5.8	0	0	0	0
311446	Firmicutes	Clostridia	Clostridiales	Ruminococcaceae			3.8	0	0	0	0
304824	Bacteroidetes	Bacteroidia	Bacteroidales	Prevotellaceae	Prevotella		5.8	0	0	0	0
297662	Firmicutes	Clostridia	Clostridiales				0	4.33333	2.2	0.2	0.2
212161	Bacteroidetes	Bacteroidia	Bacteroidales	Prevotellaceae	Prevotella		5.6	0	0	0	0
153044	Bacteroidetes	Bacteroidia	Bacteroidales				5.4	0	0	0	0
New.ReferenceOTU67	Tenericutes	Mollicutes	Anaeroplasmatales	Anaeroplasmataceae	Anaeroplasma		2	0	0	0	0
New.CleanUp.ReferenceOTU564	Actinobacteria	Coriobacteriia	Coriobacteriales	Coriobacteriaceae			0	6.66667	1.2	0.8	0
4415760	Firmicutes	Clostridia	Clostridiales	Ruminococcaceae			0	0	0	1.6	0.4
723577	Bacteroidetes	Bacteroidia	Bacteroidales	BS11			4.6	0	0	0	0
318202	Bacteroidetes	Bacteroidia	Bacteroidales				2.4	0	0.6	0	0
317045	Firmicutes	Clostridia	Clostridiales				4.6	0	0	0	0
268587	Elusimicrobia	Endomicrobia					3.6	0	0	0	0
New.CleanUp.ReferenceOTU532	Bacteroidetes	Bacteroidia	Bacteroidales	[Paraprevotellaceae]	CF231		5.8	0	0	0	0
New.CleanUp.ReferenceOTU1551	Firmicutes	Clostridia	Clostridiales	Ruminococcaceae			0	0	0	1.6	1.6
4377703	Firmicutes	Clostridia	Clostridiales	Ruminococcaceae			0	0	0	2.2	2.8
4343842	Firmicutes	Clostridia	Clostridiales				0	2.66667	1.8	0	0
4341680	Firmicutes	Clostridia	Clostridiales	Lachnospiraceae	Dorea		0	0	0	1.6	1.6
1591542	Bacteroidetes	Bacteroidia	Bacteroidales				5.4	0	0	0.2	0
432444	Firmicutes	Clostridia	Clostridiales				0	0	0	0.6	2
325883	Firmicutes	Clostridia	Clostridiales	Ruminococcaceae			0	0	0	0.8	2.4
313452	Firmicutes	Clostridia	Clostridiales	Ruminococcaceae			0	0	0	2.6	2.8
311582	Firmicutes	Clostridia	Clostridiales	Ruminococcaceae			0	0	0	0.4	1.6
298172	Firmicutes	Erysipelotrichi	Erysipelotrichales	Erysipelotrichaceae			0	0	0	2.4	2
295417	Firmicutes	Clostridia	Clostridiales	Lachnospiraceae			4	0	0	0	0
262600	Firmicutes	Erysipelotrichi	Erysipelotrichales	Erysipelotrichaceae	Bulleidia		0.6	3.66667	1.8	0	0
262016	Firmicutes	Clostridia	Clostridiales				0	3	1.6	0.2	0.2
New.ReferenceOTU474	Firmicutes	Clostridia	Clostridiales	Ruminococcaceae			0	0	0	0	1.4
New.CleanUp.ReferenceOTU967	Firmicutes	Clostridia	Clostridiales	Eubacteriaceae	Anaerofustis		0	0	0	1.8	2.6
New.CleanUp.ReferenceOTU640	Fibrobacteres	Fibrobacteria	Fibrobacterales	Fibrobacteraceae	Fibrobacter	succinogenes	5.6	0	0	0	0
New.CleanUp.ReferenceOTU285	Actinobacteria	Coriobacteriia	Coriobacteriales	Coriobacteriaceae			0	4.33333	0.4	0.2	0.4
New.CleanUp.ReferenceOTU1661	Firmicutes	Clostridia	Clostridiales				0	0	0	0.6	2.8
4449899	Firmicutes	Clostridia	Clostridiales	Ruminococcaceae			0	0	0	1	1.8
4355598	Firmicutes	Clostridia	Clostridiales	Ruminococcaceae			0	0	0	1.8	1.2
839277	Verrucomicrobia	Verruco-5	WCHB1-41	RFP12			4.2	0	0	0.2	0
694337	Firmicutes	Clostridia	Clostridiales	Ruminococcaceae			0	0	0	1.4	3
582185	Proteobacteria	Alphaproteobacteria					0	0	0	0.2	3.2
354890	Firmicutes	Clostridia	Clostridiales	Ruminococcaceae			0	0	0	1.6	2.6
297070	Firmicutes	Clostridia	Clostridiales	Ruminococcaceae			1.8	0	0.2	0	0
207019	Tenericutes	Mollicutes	Acholeplasmatales				4.6	0	0	0	0
New.ReferenceOTU294	Firmicutes	Clostridia	Clostridiales	Veillonellaceae			3.2	0	0	0	0
New.CleanUp.ReferenceOTU130	Cyanobacteria	4C0d-2	YS2				3.2	0	0.4	0	0.2
4470092	Firmicutes	Clostridia	Clostridiales	Lachnospiraceae			0	0	0	2	2.6
2025774	Tenericutes	Mollicutes	RF39				4.2	0	0.2	0	0
797183	Firmicutes	Clostridia	Clostridiales				0	0	0	2.2	2.8
762699	Firmicutes	Clostridia	Clostridiales	Ruminococcaceae			3.4	0	0	0	0
760428	Tenericutes	Mollicutes	RF39				0	3.66667	0.8	0	0
635310	Bacteroidetes	Bacteroidia	Bacteroidales				2.6	0	0.4	0	0
510377	Firmicutes	Clostridia	Clostridiales				4.2	0	0	0.4	0.2
354920	Firmicutes	Clostridia	Clostridiales				0	0	0	0.2	1.6
333577	Firmicutes	Clostridia	Clostridiales	Lachnospiraceae			0	1	3	0.4	0
311469	Firmicutes	Clostridia	Clostridiales	Lachnospiraceae			0	2.33333	2.6	0	0
151675	Firmicutes	Clostridia	Clostridiales	Lachnospiraceae			0	0.666667	4.4	0	0
New.CleanUp.ReferenceOTU946	Firmicutes	Clostridia	Clostridiales	Ruminococcaceae			0	0	0	2.2	2.6
New.CleanUp.ReferenceOTU785	Bacteroidetes	Bacteroidia	Bacteroidales				0	0	0	1.6	1.2
4468393	Bacteroidetes	Bacteroidia	Bacteroidales				4	0	0	0	0
4416763	Firmicutes	Bacilli	Lactobacillales	Streptococcaceae	Streptococcus		0	1.33333	1.6	0	0
552289	Spirochaetes	Spirochaetes	Spirochaetales	Spirochaetaceae	Treponema		3.4	0	0	0	0
510554	Bacteroidetes	Bacteroidia	Bacteroidales	Prevotellaceae	Prevotella		3	0	0	0	0
340347	Firmicutes	Clostridia	Clostridiales	Christensenellaceae			5	0	0	0	0
335120	Firmicutes	Clostridia	Clostridiales	Ruminococcaceae			4.8	0	0	0	0
293135	Bacteroidetes	Bacteroidia	Bacteroidales	[Paraprevotellaceae]	CF231		3.8	0	0	0	0
169814	Bacteroidetes	Bacteroidia	Bacteroidales				1.8	0	0	0	0
1969	Bacteroidetes	Bacteroidia	Bacteroidales	RF16			4.2	0	0	0	0
New.ReferenceOTU668	Verrucomicrobia	Verruco-5	WCHB1-41	RFP12			3.2	0	0.6	0	0
New.CleanUp.ReferenceOTU394	Verrucomicrobia	Verruco-5	WCHB1-41	RFP12			3.8	0	0.2	0.4	0
New.CleanUp.ReferenceOTU1373	Firmicutes	Clostridia					0	0	0	1.2	1.6
4430835	Bacteroidetes	Bacteroidia	Bacteroidales	Rikenellaceae			0	0	0	0.4	2.4
4314260	Firmicutes	Clostridia	Clostridiales				0	0	0	2.8	0.8
334701	Firmicutes	Clostridia	Clostridiales	Ruminococcaceae			3.4	0	0	0.2	0
316360	Firmicutes	Clostridia	Clostridiales	Ruminococcaceae	Oscillospira		0	0	0	2	2.4
204352	Firmicutes	Clostridia	Clostridiales	Ruminococcaceae	Ruminococcus		0	0	0	2.2	1.8
102090	Firmicutes	Clostridia	Clostridiales				4.6	0	0	0	0
New.ReferenceOTU500	Firmicutes	Clostridia	Clostridiales	Ruminococcaceae	Ruminococcus		0	0	0	3.2	0.6
New.CleanUp.ReferenceOTU44	Bacteroidetes	Bacteroidia	Bacteroidales	[Paraprevotellaceae]	CF231		4.2	0	0	0	0
4438136	Bacteroidetes	Bacteroidia	Bacteroidales				3.6	0	0	0	0
1796931	Firmicutes	Clostridia	Clostridiales	Ruminococcaceae			0	0	0	0.6	2
775285	Bacteroidetes	Bacteroidia	Bacteroidales				4.6	0	0	0	0
593357	Bacteroidetes	Bacteroidia	Bacteroidales	Prevotellaceae	Prevotella		4.6	0	0	0	0
587753	Actinobacteria	Coriobacteriia	Coriobacteriales	Coriobacteriaceae			0	2.33333	1.8	0	0
554461	Firmicutes	Clostridia	Clostridiales	Ruminococcaceae			3.8	0	0	0	0
345195	Bacteroidetes	Bacteroidia	Bacteroidales				2.4	0	0	0	0
328569	Firmicutes	Clostridia	Clostridiales				0	0	0	0	1
264507	Firmicutes	Clostridia	Clostridiales				3.6	0	0	0	0
111274	Firmicutes	Clostridia	Clostridiales				4.6	0	0	0	0
14027	Firmicutes	Clostridia	Clostridiales	Lachnospiraceae			4.4	0	0	0	0
New.ReferenceOTU34	Bacteroidetes	Bacteroidia	Bacteroidales	[Paraprevotellaceae]			2.6	0	0	0	0
New.ReferenceOTU2	Bacteroidetes	Bacteroidia	Bacteroidales	[Paraprevotellaceae]			3.6	0	0	0	0
New.CleanUp.ReferenceOTU983	Firmicutes	Clostridia	Clostridiales	Ruminococcaceae			0	0	0	0.2	2.4
New.CleanUp.ReferenceOTU149	Firmicutes	Clostridia	Clostridiales	Ruminococcaceae			0	2.33333	2.6	0	0
4480842	Firmicutes	Clostridia	Clostridiales	Ruminococcaceae			0.2	0	0	2.6	0.8
4446741	Firmicutes	Clostridia	Clostridiales	Lachnospiraceae			4	0	0.6	0	0
1101434	Firmicutes	Clostridia	Clostridiales	Ruminococcaceae			0	0	0	1.2	2.2
816483	Bacteroidetes	Bacteroidia	Bacteroidales				3.6	0	0	0	0
349176	Bacteroidetes	Bacteroidia	Bacteroidales				4	0	0	0	0
308383	Firmicutes	Clostridia	Clostridiales				0.2	1	1.4	0.4	0
303164	Firmicutes	Clostridia	Clostridiales	Ruminococcaceae			0	0	0	1.4	2.2
236865	Bacteroidetes	Bacteroidia	Bacteroidales	Prevotellaceae	Prevotella		4	0.333333	0	0	0
New.ReferenceOTU714	Firmicutes	Erysipelotrichi	Erysipelotrichales	Erysipelotrichaceae	Coprobacillus		0	3.33333	1.6	0	0.2
New.ReferenceOTU111	Firmicutes	Clostridia	Clostridiales	Ruminococcaceae			4.2	0	0	0	0
New.CleanUp.ReferenceOTU905	Actinobacteria	Coriobacteriia	Coriobacteriales	Coriobacteriaceae			0	2.66667	1.8	0	1
New.CleanUp.ReferenceOTU878	Firmicutes	Erysipelotrichi	Erysipelotrichales	Erysipelotrichaceae	p-75-a5		0	1.66667	0.8	0	0
New.CleanUp.ReferenceOTU26	Tenericutes	Mollicutes	Anaeroplasmatales	Anaeroplasmataceae	Anaeroplasma		2	0	0	0	0
New.CleanUp.ReferenceOTU1218	Actinobacteria	Coriobacteriia	Coriobacteriales	Coriobacteriaceae			0	3	2.2	0.2	0.2
New.CleanUp.ReferenceOTU1168	Firmicutes	Clostridia	Clostridiales	Ruminococcaceae			0	0	0	1	2
New.CleanUp.ReferenceOTU1038	Firmicutes	Clostridia	Clostridiales	Lachnospiraceae			0	1.33333	0.6	0	0
4477911	Firmicutes	Clostridia	Clostridiales	Ruminococcaceae			0	0	0	1.8	2.2
4322752	Firmicutes	Clostridia	Clostridiales				0	0	0	0.8	1.8
808245	Actinobacteria	Actinobacteria	Actinomycetales	Corynebacteriaceae	Corynebacterium		0.4	3	2.2	0	0
709405	Spirochaetes	Spirochaetes	Spirochaetales	Spirochaetaceae	Treponema		3	0	0	0	0
512543	Bacteroidetes	Bacteroidia	Bacteroidales				4	0	0	0	0
299985	Firmicutes	Clostridia	Clostridiales	Lachnospiraceae			0	4	1.4	0	0
265265	Firmicutes	Clostridia	Clostridiales	Lachnospiraceae			1.4	0	0	0	0
241034	Bacteroidetes	Bacteroidia	Bacteroidales	BS11			2.8	0	0.2	0	0
171639	Bacteroidetes	Bacteroidia	Bacteroidales	Prevotellaceae	Prevotella		2.2	0	0	0	0
102794	Firmicutes	Clostridia	Clostridiales	Lachnospiraceae			2.8	0	0	0	0
New.ReferenceOTU748	Firmicutes	Clostridia	Clostridiales	Lachnospiraceae	Butyrivibrio		0	2.33333	1	0	0
New.ReferenceOTU19	Spirochaetes	Spirochaetes	Spirochaetales	Spirochaetaceae	Treponema		3.8	0	0	0	0
4315474	Firmicutes	Clostridia	Clostridiales	Ruminococcaceae	Ruminococcus		0	0.333333	2.8	0	0.4
856191	Firmicutes	Clostridia	Clostridiales	Christensenellaceae			3.2	0	0	0	0
739683	Bacteroidetes	Bacteroidia	Bacteroidales				2.6	0	0	0	0
679256	Spirochaetes	Spirochaetes	Spirochaetales	Spirochaetaceae	Treponema		2.4	0	0	0	0
559781	Bacteroidetes	Bacteroidia	Bacteroidales				4.2	0	0	0	0
301015	Firmicutes	Clostridia	Clostridiales	Ruminococcaceae			0	0	0	1.2	3
300809	Firmicutes	Clostridia	Clostridiales				0	0	0	0.6	1
256835	Firmicutes	Clostridia	Clostridiales	Ruminococcaceae			0	0	0	0.8	1.2
212460	Firmicutes	Clostridia	Clostridiales	Lachnospiraceae	Butyrivibrio		1.2	0	0	0	0
106839	Bacteroidetes	Bacteroidia	Bacteroidales	Prevotellaceae	Prevotella		3.6	0	0	0	0
83719	Bacteroidetes	Bacteroidia	Bacteroidales				1.6	0	0	0	0
New.ReferenceOTU260	Bacteroidetes	Bacteroidia	Bacteroidales	RF16			3.4	0	0	0	0
New.ReferenceOTU178	Bacteroidetes	Bacteroidia	Bacteroidales	[Paraprevotellaceae]	CF231		2.8	0	0	0	0
New.CleanUp.ReferenceOTU83	Firmicutes	Clostridia	Clostridiales	Ruminococcaceae			1.4	0	0	0	0
2032782	Bacteroidetes	Bacteroidia	Bacteroidales	BS11			3	0.333333	0	0	0
825355	Verrucomicrobia	Verruco-5	WCHB1-41	RFP12			3.2	0	0	0	0
807096	Firmicutes	Clostridia	Clostridiales	[Mogibacteriaceae]			2.4	0	0	0	0
686750	Firmicutes	Erysipelotrichi	Erysipelotrichales	Erysipelotrichaceae	RFN20		3.2	0	0	0	0
590911	Bacteroidetes	Bacteroidia	Bacteroidales				3.2	0	0	0	0
584804	Firmicutes	Clostridia	Clostridiales				3.4	0	0	0	0
355922	Firmicutes	Clostridia	Clostridiales	Ruminococcaceae			0.4	0	0	1.8	0.8
347587	Tenericutes	Mollicutes	RF39				0	0	0	1.4	1.6
329405	Firmicutes	Clostridia	Clostridiales				2.4	0	0	0	0
299367	Bacteroidetes	Bacteroidia	Bacteroidales	RF16			3.2	0	0.4	0	0
110046	Firmicutes	Clostridia	Clostridiales	Lachnospiraceae			2.2	0	0	0	0
105108	Firmicutes	Clostridia	Clostridiales				0.4	1.66667	1.6	0.4	0
83423	Bacteroidetes	Bacteroidia	Bacteroidales				3.8	0	0	0	0
New.ReferenceOTU51	Bacteroidetes	Bacteroidia	Bacteroidales	Prevotellaceae	Prevotella		3.2	0	0	0	0
New.ReferenceOTU415	Bacteroidetes	Bacteroidia	Bacteroidales				1.4	0	0	0	0
New.ReferenceOTU395	Bacteroidetes	Bacteroidia	Bacteroidales				3.6	0.333333	0	0	0
New.ReferenceOTU136	Tenericutes	RF3	ML615J-28				2.8	0	0	0	0
New.CleanUp.ReferenceOTU324	Firmicutes	Clostridia	Clostridiales				3.2	0	0	0	0
New.CleanUp.ReferenceOTU2	Bacteroidetes	Bacteroidia	Bacteroidales	[Paraprevotellaceae]			3.4	0	0	0	0
1845355	Firmicutes	Clostridia	Clostridiales	Ruminococcaceae	Oscillospira		0	0	0	1.6	1
779987	Bacteroidetes	Bacteroidia	Bacteroidales	Bacteroidaceae	BF311		3.6	0	0	0	0
585998	Firmicutes	Clostridia	Clostridiales	[Mogibacteriaceae]	Mogibacterium		0	1.66667	0.8	0	0
568828	Firmicutes	Clostridia	Clostridiales	Lachnospiraceae			0	1.33333	0.6	0	0
299493	Firmicutes	Clostridia	Clostridiales	Eubacteriaceae	Anaerofustis		0	1	2.6	0	0
263036	Firmicutes	Clostridia	Clostridiales	Clostridiaceae	Clostridium		2	0	0	0	0
240746	Firmicutes	Clostridia	Clostridiales				2.4	0.333333	0	0	0
101085	Bacteroidetes	Bacteroidia	Bacteroidales				2.6	0	0	0	0
100123	Lentisphaerae	[Lentisphaeria]	Victivallales	Victivallaceae			2.6	1	0.2	0	0.4
New.ReferenceOTU112	Bacteroidetes	Bacteroidia	Bacteroidales	Prevotellaceae	Prevotella		3.6	0	0	0	0
New.CleanUp.ReferenceOTU981	Firmicutes	Clostridia	Clostridiales	Ruminococcaceae			0	0	0	1	2.6
New.CleanUp.ReferenceOTU808	Firmicutes	Clostridia	Clostridiales				0	0.666667	2.6	0	0
New.CleanUp.ReferenceOTU1962	Actinobacteria	Coriobacteriia	Coriobacteriales	Coriobacteriaceae			0	2.66667	1.8	0	0
New.CleanUp.ReferenceOTU176	Bacteroidetes	Bacteroidia	Bacteroidales	[Paraprevotellaceae]	YRC22		3.6	0	0	0	0
New.CleanUp.ReferenceOTU1539	Firmicutes	Clostridia	Clostridiales	Ruminococcaceae			0	0	0	2.8	0.6
4353658	Firmicutes	Clostridia	Clostridiales	Veillonellaceae	Phascolarctobacterium		0	0	0	1.4	0
704365	Spirochaetes	Spirochaetes	Spirochaetales	Spirochaetaceae	Treponema		2.6	0	0	0	0
571563	Firmicutes	Clostridia	Clostridiales				2.8	0	0	0	0
345986	Firmicutes	Clostridia	Clostridiales				3.4	0	0	0	0
330512	Tenericutes	Mollicutes	RF39				2.6	0.333333	0.6	0	0
328450	Bacteroidetes	Bacteroidia	Bacteroidales	Prevotellaceae	Prevotella		3.2	0	0.2	0	0
325489	Tenericutes	Mollicutes	RF39				0	2.33333	1.8	0	0
314644	Firmicutes	Clostridia	Clostridiales				0	0	0	1.4	0.2
265639	Tenericutes	Mollicutes	RF39				3.4	0	0.2	0	0
237728	Bacteroidetes	Bacteroidia	Bacteroidales				2.2	0	0	0	0
148352	Firmicutes	Clostridia	Clostridiales	Ruminococcaceae			0	0	0	1.4	0.6
109798	Firmicutes	Clostridia	Clostridiales	Lachnospiraceae	Coprococcus		2.8	0	0	0	0
106444	Firmicutes	Clostridia	Clostridiales	Lachnospiraceae			0	2.66667	1	0	0
106054	Verrucomicrobia	Verruco-5	WCHB1-41	RFP12			2.4	0	0	0	0
New.ReferenceOTU582	Firmicutes	Clostridia	Clostridiales	Ruminococcaceae			0	0	0	0.4	1.4
New.CleanUp.ReferenceOTU1553	Firmicutes	Clostridia	Clostridiales	Ruminococcaceae			0	0	0	0.6	1.4
4473116	Firmicutes	Clostridia	Clostridiales	Ruminococcaceae			0	0	0	0.4	1.4
789275	Firmicutes	Erysipelotrichi	Erysipelotrichales	Erysipelotrichaceae	p-75-a5		0	0	0	2.2	0.2
338195	Firmicutes	Clostridia	Clostridiales				2.2	0	0	0	0
324304	Firmicutes	Erysipelotrichi	Erysipelotrichales	Erysipelotrichaceae	RFN20		2.2	0	0	0	0
304289	Bacteroidetes	Bacteroidia	Bacteroidales	[Paraprevotellaceae]	CF231		3.4	0	0	0	0
267039	Firmicutes	Clostridia	Clostridiales	Lachnospiraceae	Blautia		0	1.33333	1.2	0	0
111098	Firmicutes	Clostridia	Clostridiales				0	1.66667	1.2	0.2	0
New.ReferenceOTU617	Fibrobacteres	Fibrobacteria	Fibrobacterales	Fibrobacteraceae	Fibrobacter	succinogenes	1.8	0	0	0	0
New.ReferenceOTU433	Bacteroidetes	Bacteroidia	Bacteroidales	BS11			2	0	0	0	0
New.ReferenceOTU412	Firmicutes	Clostridia	Clostridiales	Lachnospiraceae	Butyrivibrio		2.8	0	0	0	0
New.ReferenceOTU403	Firmicutes	Clostridia	Clostridiales				2.4	0	0	0	0
New.ReferenceOTU337	Bacteroidetes	Bacteroidia	Bacteroidales	Prevotellaceae	Prevotella		3.2	0	0	0	0
New.ReferenceOTU208	Proteobacteria	Deltaproteobacteria	Desulfovibrionales	Desulfovibrionaceae	Desulfovibrio		2.2	0	0	0	0
New.ReferenceOTU164	Bacteroidetes	Bacteroidia	Bacteroidales				3.2	0	0	0	0
New.CleanUp.ReferenceOTU996	Firmicutes	Clostridia	Clostridiales	[Mogibacteriaceae]			0	1.66667	1.6	0.2	0.2
New.CleanUp.ReferenceOTU5259	Firmicutes	Clostridia	Clostridiales	Ruminococcaceae			0	0	0	2.2	0.6
4468394	Bacteroidetes	Bacteroidia	Bacteroidales				2.6	0	0	0	0
674171	Firmicutes	Clostridia	Clostridiales	Veillonellaceae	Selenomonas		2.2	0	0	0	0
290980	Bacteroidetes	Bacteroidia	Bacteroidales				2.8	0	0	0	0
248651	Bacteroidetes	Bacteroidia	Bacteroidales				3	0	0	0	0
105964	Firmicutes	Clostridia	Clostridiales	Ruminococcaceae	Ruminococcus	flavefaciens	3.2	0	0	0	0
New.CleanUp.ReferenceOTU1300	Actinobacteria	Coriobacteriia	Coriobacteriales	Coriobacteriaceae			0	0.333333	2.6	0.2	0
4452761	Firmicutes	Clostridia	Clostridiales	Ruminococcaceae			2.8	0	0	0	0
4365126	Firmicutes	Clostridia	Clostridiales				0	0	0	1.2	0.2
4299547	Firmicutes	Clostridia	Clostridiales	Christensenellaceae			0	0	0	1.6	0.8
651134	Bacteroidetes	Bacteroidia	Bacteroidales				3	0	0	0	0
509083	Actinobacteria	Coriobacteriia	Coriobacteriales	Coriobacteriaceae			0	2	1.8	0	0
337086	Verrucomicrobia	Verruco-5	WCHB1-41	RFP12			0	0	0	0	1.2
15713	Firmicutes	Erysipelotrichi	Erysipelotrichales	Erysipelotrichaceae	RFN20		2.4	0	0	0	0
2128	Bacteroidetes	Bacteroidia	Bacteroidales	Prevotellaceae	Prevotella		3	0	0	0	0
New.ReferenceOTU762	Firmicutes	Clostridia	Clostridiales				2.4	0	0	0	0
New.ReferenceOTU637	Firmicutes	Clostridia	Clostridiales	[Mogibacteriaceae]			2.4	0	0	0	0
New.ReferenceOTU566	Proteobacteria	Deltaproteobacteria	Desulfovibrionales	Desulfovibrionaceae	Desulfovibrio		1.6	0	0	0	0
New.CleanUp.ReferenceOTU944	Actinobacteria	Coriobacteriia	Coriobacteriales	Coriobacteriaceae	Adlercreutzia		0	0	0.8	0	0
New.CleanUp.ReferenceOTU6803	Firmicutes	Clostridia	Clostridiales	Lachnospiraceae			0	2.33333	1.2	0	0
New.CleanUp.ReferenceOTU221	Lentisphaerae	[Lentisphaeria]	Victivallales	Victivallaceae			2.8	0	0	0	0
4352244	Firmicutes	Clostridia	Clostridiales	Clostridiaceae	Clostridium		2.8	0	0	0	0
708876	Firmicutes	Clostridia	Clostridiales				1.6	0	0	0	0
580224	Firmicutes	Clostridia	Clostridiales				0	0	0.8	0	0
578740	Firmicutes	Clostridia	Clostridiales	Ruminococcaceae			0	0	0	1.4	0
323807	Tenericutes	Mollicutes	RF39				1.6	0	0	0	0
314639	Firmicutes	Clostridia	Clostridiales				2.4	0	0	0	0
303898	Firmicutes	Clostridia	Clostridiales	Ruminococcaceae			0.4	0	0	0.2	1.8
148279	Firmicutes	Clostridia	Clostridiales	Lachnospiraceae	Blautia		0	1.66667	0	0	0
107159	Firmicutes	Clostridia	Clostridiales				0	0.666667	1.4	0	0
New.ReferenceOTU77	Bacteroidetes	Bacteroidia	Bacteroidales				2.6	0	0	0	0
New.ReferenceOTU368	Firmicutes	Clostridia	Clostridiales				2.2	0	0	0	0
New.CleanUp.ReferenceOTU593	Proteobacteria	Alphaproteobacteria	RF32				1.8	0	0	0	0
New.CleanUp.ReferenceOTU588	Tenericutes	Mollicutes	RF39				2.6	0	0	0	0
New.CleanUp.ReferenceOTU32	Bacteroidetes	Bacteroidia	Bacteroidales	[Paraprevotellaceae]			2.4	0	0	0	0
New.CleanUp.ReferenceOTU315	Firmicutes	Clostridia	Clostridiales				2.2	0	0	0	0
3662847	Firmicutes	Bacilli	Bacillales	Bacillaceae			0	1.66667	1.6	0	0
1912119	Firmicutes	Clostridia	Clostridiales				0.2	0.333333	1.6	0	0
1106384	Actinobacteria	Coriobacteriia	Coriobacteriales	Coriobacteriaceae			0.2	0.333333	1.6	0.4	0
583266	Firmicutes	Clostridia	Clostridiales	Lachnospiraceae			2.6	0	0	0	0
546619	Firmicutes	Clostridia	Clostridiales	Ruminococcaceae			0	0.666667	1.2	0	0
324066	Bacteroidetes	Bacteroidia	Bacteroidales	Bacteroidaceae			1.8	0	0	0	0
259533	Spirochaetes	Spirochaetes	Spirochaetales	Spirochaetaceae	Treponema		1.4	0	0	0	0
New.ReferenceOTU72	Tenericutes	Mollicutes	RF39				2	0	0	0	0
New.ReferenceOTU620	Bacteroidetes	Bacteroidia	Bacteroidales	BS11			2.4	0	0	0	0
New.CleanUp.ReferenceOTU170	Spirochaetes	Spirochaetes	Spirochaetales	Spirochaetaceae	Treponema		2.4	0	0	0	0
4413539	Firmicutes	Clostridia	Clostridiales	Clostridiaceae	Clostridium		2.4	0	0	0	0
4411108	Firmicutes	Clostridia	Clostridiales	Clostridiaceae	Clostridium		0.2	0.666667	1.4	0	0
311193	Bacteroidetes	Bacteroidia	Bacteroidales	BS11			2	0	0	0	0
211927	Firmicutes	Erysipelotrichi	Erysipelotrichales	Erysipelotrichaceae	RFN20		2.2	0	0	0	0
180659	Firmicutes	Clostridia	Clostridiales	Ruminococcaceae	Oscillospira		0	0	0	0	1
26280	Firmicutes	Clostridia	Clostridiales				1.2	0	0	0	0
New.ReferenceOTU466	Firmicutes	Clostridia	Clostridiales				1.8	0	0	0	0
New.ReferenceOTU419	Firmicutes	Clostridia	Clostridiales	Clostridiaceae			2	0	0	0	0
New.ReferenceOTU239	Firmicutes	Clostridia	Clostridiales	Lachnospiraceae	Coprococcus		0	0.333333	1.8	0.2	0
New.ReferenceOTU179	Bacteroidetes	Bacteroidia	Bacteroidales	Prevotellaceae	Prevotella		2.2	0	0	0	0
New.ReferenceOTU15	Bacteroidetes	Bacteroidia	Bacteroidales	Prevotellaceae	Prevotella		2.2	0	0	0	0
New.CleanUp.ReferenceOTU4	Bacteroidetes	Bacteroidia	Bacteroidales	Prevotellaceae	Prevotella		2	0	0	0	0
New.CleanUp.ReferenceOTU30	Bacteroidetes	Bacteroidia	Bacteroidales	[Paraprevotellaceae]	CF231		2.2	0	0	0	0
New.CleanUp.ReferenceOTU1564	Firmicutes	Clostridia	Clostridiales	Ruminococcaceae			0	0	0	0	1.2
New.CleanUp.ReferenceOTU114	Bacteroidetes	Bacteroidia	Bacteroidales	[Paraprevotellaceae]	YRC22		1.2	0	0	0	0
552400	Bacteroidetes	Bacteroidia	Bacteroidales	Prevotellaceae	Prevotella		2	0	0	0	0
310245	Bacteroidetes	Bacteroidia	Bacteroidales				2	0	0	0	0
265197	Tenericutes	Mollicutes	RF39				1.6	0	0	0	0
169164	Bacteroidetes	Bacteroidia	Bacteroidales				2.2	0	0	0	0
New.CleanUp.ReferenceOTU746	Firmicutes	Clostridia	Clostridiales	Ruminococcaceae			0	1.33333	1.2	0	0
New.CleanUp.ReferenceOTU3130	Firmicutes	Clostridia	Clostridiales	Veillonellaceae	Phascolarctobacterium		0	0	0	1.4	0.4
New.CleanUp.ReferenceOTU1701	Spirochaetes	Spirochaetes	Spirochaetales	Spirochaetaceae	Treponema		1.4	0	0	0	0
537163	Firmicutes	Clostridia	Clostridiales	Lachnospiraceae			1.8	0	0	0	0
301979	Firmicutes	Clostridia	Clostridiales	Ruminococcaceae			0	0	0	1.2	0
289431	Firmicutes	Clostridia	Clostridiales	[Mogibacteriaceae]			2	0	0	0	0
272555	Actinobacteria	Coriobacteriia	Coriobacteriales	Coriobacteriaceae			0.2	0.333333	1.4	0	0
151176	Proteobacteria	Alphaproteobacteria	Rhizobiales	Methylobacteriaceae	Methylobacterium	organophilum	0	0	2	0	0
New.ReferenceOTU42	Bacteroidetes	Bacteroidia	Bacteroidales				1.8	0	0	0	0
New.ReferenceOTU384	Bacteroidetes	Bacteroidia	Bacteroidales	Prevotellaceae	Prevotella		1.4	0	0	0	0
New.ReferenceOTU147	Bacteroidetes	Bacteroidia	Bacteroidales	Prevotellaceae	Prevotella		1.6	0	0	0	0
New.CleanUp.ReferenceOTU889	Spirochaetes	Spirochaetes	Spirochaetales	Spirochaetaceae	Treponema		1.8	0	0	0	0
New.CleanUp.ReferenceOTU472	Tenericutes	Mollicutes	RF39				1.8	0	0	0	0
New.CleanUp.ReferenceOTU135	Firmicutes	Clostridia	Clostridiales	[Mogibacteriaceae]			1.6	0	0	0	0
4296778	Firmicutes	Clostridia	Clostridiales	Lachnospiraceae			0	0	0	0.2	1
822202	Firmicutes	Clostridia	Clostridiales	Ruminococcaceae			1.2	0	0	0	0
799251	Spirochaetes	Spirochaetes	Spirochaetales	Spirochaetaceae	Treponema		1.8	0	0	0	0
588624	Firmicutes	Clostridia	Clostridiales	Ruminococcaceae	Ruminococcus		1.6	0	0	0	0
346727	Firmicutes	Erysipelotrichi	Erysipelotrichales	Erysipelotrichaceae	RFN20		1.6	0	0	0	0
300383	Firmicutes	Clostridia	Clostridiales				1.4	0	0	0	0
227565	Firmicutes	Clostridia	Clostridiales	Ruminococcaceae			0	0	0	0.2	1
New.ReferenceOTU79	Bacteroidetes	Bacteroidia	Bacteroidales				1.6	0	0	0	0
New.ReferenceOTU681	Bacteroidetes	Bacteroidia	Bacteroidales	Prevotellaceae	Prevotella		1.6	0	0	0	0
New.ReferenceOTU404	Bacteroidetes	Bacteroidia	Bacteroidales	[Paraprevotellaceae]	CF231		1.2	0	0	0	0
New.CleanUp.ReferenceOTU350	Proteobacteria	Alphaproteobacteria					1.4	0	0	0	0
New.CleanUp.ReferenceOTU1531	Firmicutes	Clostridia	Clostridiales				1.6	0	0	0	0
New.CleanUp.ReferenceOTU1097	Actinobacteria	Coriobacteriia	Coriobacteriales	Coriobacteriaceae			0	1.66667	0.2	0.4	0
New.CleanUp.ReferenceOTU108	Firmicutes	Clostridia	Clostridiales	Veillonellaceae			1.6	0	0	0	0
3949300	Firmicutes	Clostridia	Clostridiales				1.6	0	0	0	0
593156	Firmicutes	Clostridia	Clostridiales				1.2	0	0	0	0
346243	Firmicutes	Clostridia	Clostridiales				0	0.666667	1.2	0	0
345353	Firmicutes	Clostridia	Clostridiales	Ruminococcaceae			1.6	0	0	0	0
332784	Firmicutes	Clostridia	Clostridiales				1.6	0	0	0	0
318963	Bacteroidetes	Bacteroidia	Bacteroidales				1.4	0	0	0	0
274397	Tenericutes	Mollicutes	RF39				1.2	0	0	0	0
262387	Bacteroidetes	Bacteroidia	Bacteroidales	Prevotellaceae	Prevotella		1.6	0	0	0	0
204369	Firmicutes	Clostridia	Clostridiales	Christensenellaceae			0	0	0	0.8	0
110634	Firmicutes	Clostridia	Clostridiales				1.2	0	0	0	0
New.CleanUp.ReferenceOTU1831	Firmicutes	Clostridia	Clostridiales	Ruminococcaceae			0	0	0	0	1
4317006	Firmicutes	Clostridia	Clostridiales	Ruminococcaceae			0	0	0	0	0.8
302422	Firmicutes	Clostridia	Clostridiales	Lachnospiraceae			1.4	0	0	0	0
New.ReferenceOTU116	Tenericutes	Mollicutes	RF39				1	0	0	0	0
New.CleanUp.ReferenceOTU2384	Firmicutes	Clostridia	Clostridiales				0	0	0	0	1.2
New.CleanUp.ReferenceOTU184	Bacteroidetes	Bacteroidia	Bacteroidales				1.2	0	0	0	0
New.CleanUp.ReferenceOTU1430	Verrucomicrobia	Verruco-5	WCHB1-41	RFP12			1.2	0	0	0	0
4418317	Firmicutes	Clostridia	Clostridiales	Dehalobacteriaceae	Dehalobacterium		0	0	0	0.8	0
965381	Firmicutes	Clostridia	Clostridiales	[Mogibacteriaceae]	Anaerovorax		0	0	0	0	1
233103	Firmicutes	Clostridia	Clostridiales	Lachnospiraceae			0	1.33333	0	0	0
156219	Firmicutes	Clostridia	Clostridiales				0	0.666667	0.8	0	0
110682	Firmicutes	Clostridia	Clostridiales	Lachnospiraceae			1.2	0	0	0	0
New.CleanUp.ReferenceOTU1152	Verrucomicrobia	Verruco-5	WCHB1-41	RFP12			1	0	0	0	0
776019	Firmicutes	Clostridia	Clostridiales				1	0	0	0	0
564267	Firmicutes	Clostridia	Clostridiales	Ruminococcaceae			0	0	0	0	1
271324	Firmicutes	Clostridia	Clostridiales	[Mogibacteriaceae]			0	0.666667	0	0	0
New.CleanUp.ReferenceOTU3062	Firmicutes	Clostridia	Clostridiales	[Mogibacteriaceae]			0	1	0	0	0
806092	Actinobacteria	Actinobacteria	Actinomycetales	Microbacteriaceae			0	1.33333	0	0	0
319476	Firmicutes	Clostridia	Clostridiales	Lachnospiraceae	Blautia		0	0.666667	0	0	0
328238	Firmicutes	Clostridia	Clostridiales				0	1	0	0	0
243911	Firmicutes	Clostridia	Clostridiales	[Mogibacteriaceae]	Mogibacterium		0	0	0.6	0	0
New.CleanUp.ReferenceOTU30348	Actinobacteria	Coriobacteriia	Coriobacteriales	Coriobacteriaceae			0	0.666667	0	0	0
New.CleanUp.ReferenceOTU30242	Firmicutes	Clostridia	Clostridiales				0	0.666667	0	0	0
4451432	Actinobacteria	Actinobacteria	Actinomycetales	Nocardioidaceae			0	0.666667	0	0	0
1895780	Firmicutes	Clostridia	Clostridiales	Lachnospiraceae			0	0.666667	0	0	0
562900	Firmicutes	Clostridia	Clostridiales				0	0.666667	0	0	0
258447	Firmicutes	Clostridia	Clostridiales				0	0.666667	0	0	0
Alfalfa-fed
OTU	Phylum	Class	Order	Family	Genus	Species	AH_C1	AH_Jej	AH_Il	AH_Cec	AH_LI
2036	Bacteroidetes	Bacteroidia	Bacteroidales	[Paraprevotellaceae]			3.66667	0	0	0	0
2113	Bacteroidetes	Bacteroidia	Bacteroidales	Prevotellaceae	Prevotella		30	0.5	0.8	0	0.2
2115	Bacteroidetes	Bacteroidia	Bacteroidales	Prevotellaceae	Prevotella		14.6667	0	0.6	0.4	0
2116	Bacteroidetes	Bacteroidia	Bacteroidales	Prevotellaceae	Prevotella		56.6667	0.5	0.4	0	0
3585	Fibrobacteres	Fibrobacteria	Fibrobacterales	Fibrobacteraceae	Fibrobacter	succinogenes	27	0.25	0.4	0	0
13950	Firmicutes	Clostridia	Clostridiales	Lachnospiraceae	Butyrivibrio		4.33333	1	0	0	0
13968	Firmicutes	Clostridia	Clostridiales				7	0	0	0	0
15993	Firmicutes	Clostridia	Clostridiales				1	0	0	16.6	8.2
21464	Firmicutes	Clostridia	Clostridiales	Ruminococcaceae	Oscillospira		20.6667	3.25	1	0	0
31534	Firmicutes	Clostridia	Clostridiales	Lachnospiraceae			0	6.25	2.2	0	0
47100	Firmicutes	Clostridia	Clostridiales				0	0	0	3.8	2.4
47737	Firmicutes	Clostridia	Clostridiales	Ruminococcaceae			0	0	0	3	1.2
52163	Firmicutes	Clostridia	Clostridiales	Lachnospiraceae	Butyrivibrio		0	29.75	18.6	1.8	0.4
83719	Bacteroidetes	Bacteroidia	Bacteroidales				4.33333	0	0	0	0
84120	Bacteroidetes	Bacteroidia	Bacteroidales				4	0	0	0	0
84779	Firmicutes	Clostridia	Clostridiales	Ruminococcaceae	Ruminococcus		16.6667	0.25	0.4	0	0.2
86050	Bacteroidetes	Bacteroidia	Bacteroidales	Prevotellaceae	Prevotella		24.3333	0	0.2	0	0
86520	Bacteroidetes	Bacteroidia	Bacteroidales	Prevotellaceae	Prevotella		2.66667	0	0	0	0
99332	Actinobacteria	Coriobacteriia	Coriobacteriales	Coriobacteriaceae			1	5.75	11.2	0.8	0
99718	Firmicutes	Clostridia	Clostridiales				0	18.75	27	4.4	3.4
100265	Bacteroidetes	Bacteroidia	Bacteroidales	Prevotellaceae	Prevotella		89.6667	0.5	0.8	0	0.4
100680	Bacteroidetes	Bacteroidia	Bacteroidales	Prevotellaceae	Prevotella		10.3333	0.25	0.2	0	0
100923	Bacteroidetes	Bacteroidia	Bacteroidales				3.33333	0	0	0	0
101011	Firmicutes	Clostridia	Clostridiales				1	5.5	3.8	1	0
101860	Firmicutes	Clostridia	Clostridiales	Lachnospiraceae	Lachnospira		36	0.25	0	0	0
102424	Firmicutes	Clostridia	Clostridiales	Ruminococcaceae			0	0	0	1.4	3
102704	Firmicutes	Clostridia	Clostridiales	Lachnospiraceae			0	1.25	1.6	0	0
102794	Firmicutes	Clostridia	Clostridiales	Lachnospiraceae			2.66667	0	0	0	0
102929	Bacteroidetes	Bacteroidia	Bacteroidales	Prevotellaceae	Prevotella		20.6667	0.25	0	0	0
103100	Bacteroidetes	Bacteroidia	Bacteroidales	Prevotellaceae	Prevotella		21	1.5	1.2	0.6	0
103742	Bacteroidetes	Bacteroidia	Bacteroidales				5.66667	0	0	0	0
105974	Firmicutes	Clostridia	Clostridiales	Lachnospiraceae	Butyrivibrio		20	7	3.8	1.2	0.6
107009	Firmicutes	Clostridia	Clostridiales	Ruminococcaceae	Ruminococcus		0.333333	5.25	5.4	0.6	1.2
107586	Bacteroidetes	Bacteroidia	Bacteroidales	Prevotellaceae	Prevotella		22.3333	0.75	0.8	0	0.2
109624	Firmicutes	Clostridia	Clostridiales	[Mogibacteriaceae]	Mogibacterium		0	3.5	5.4	3.2	0
109634	Firmicutes	Clostridia	Clostridiales	[Mogibacteriaceae]	Mogibacterium		2	254.25	262.4	52.4	21.2
109753	Firmicutes	Clostridia	Clostridiales	Ruminococcaceae			1	10.5	5	0.6	0
109841	Firmicutes	Clostridia	Clostridiales	Ruminococcaceae			2.66667	0.5	0.2	9	8.8
109933	Firmicutes	Clostridia	Clostridiales				9.33333	31.5	18.4	4.8	3.2
109953	Firmicutes	Clostridia	Clostridiales				2.33333	0	0	0	0
109978	Firmicutes	Clostridia	Clostridiales	Ruminococcaceae			5	89	55.4	7.8	6.4
110046	Firmicutes	Clostridia	Clostridiales	Lachnospiraceae			3	0	0	0	0
110355	Firmicutes	Clostridia	Clostridiales				0.333333	5.75	6.6	1.2	1
110361	Firmicutes	Clostridia	Clostridiales	Lachnospiraceae			6	0	0	0	0
110428	Firmicutes	Clostridia	Clostridiales				0	11.5	12.8	2.2	0
110829	Firmicutes	Clostridia	Clostridiales				0	15	14.2	3.6	2.4
110836	Firmicutes	Clostridia	Clostridiales	Ruminococcaceae			3.33333	37	32.6	2.2	1.4
110858	Firmicutes	Clostridia	Clostridiales	Lachnospiraceae			0	6.25	2.8	0.2	0
111019	Firmicutes	Clostridia	Clostridiales	Ruminococcaceae			0.333333	0	0	8.2	8.4
111024	Firmicutes	Clostridia	Clostridiales				0	7.5	8.2	1.6	0.8
111267	Firmicutes	Clostridia	Clostridiales	Ruminococcaceae	Ruminococcus		6	0	0.2	0	0
111325	Firmicutes	Clostridia	Clostridiales				0	7	6.2	1.2	0.4
112166	Firmicutes	Clostridia	Clostridiales	Ruminococcaceae	Ruminococcus		0	11	9.2	0.8	0.2
112385	Firmicutes	Clostridia	Clostridiales				0.333333	7.5	5	0	0.6
112771	Firmicutes	Clostridia	Clostridiales				0	4	2.2	0	0
114400	Firmicutes	Clostridia	Clostridiales	Ruminococcaceae			0	0	0	3	4.8
131100	Firmicutes	Clostridia	Clostridiales	Lachnospiraceae			0	9.5	5	0.6	0
131386	Firmicutes	Clostridia	Clostridiales	Lachnospiraceae			3.66667	49.25	33.4	7.6	2.2
132359	Firmicutes	Clostridia	Clostridiales	Lachnospiraceae			0	0	0	3.6	3.2
137650	Firmicutes	Clostridia	Clostridiales	Lachnospiraceae			0	2	1	0	0.2
142942	Firmicutes	Clostridia	Clostridiales				0	8.5	7.6	1	1.6
143138	Bacteroidetes	Bacteroidia	Bacteroidales	[Paraprevotellaceae]			17	0	0	0	0
149120	Firmicutes	Clostridia	Clostridiales	Lachnospiraceae			0	8	6.2	1.2	0.2
150858	Bacteroidetes	Bacteroidia	Bacteroidales	Prevotellaceae	Prevotella		3.33333	0	0	0	0
151841	Bacteroidetes	Bacteroidia	Bacteroidales				9.66667	0	0	0	0
153989	Firmicutes	Clostridia	Clostridiales				0.666667	11	6.4	2.2	0.4
154576	Bacteroidetes	Bacteroidia	Bacteroidales				0	0	0	16.8	15.2
155468	Bacteroidetes	Bacteroidia	Bacteroidales				3.33333	0	0	0	0
163539	Firmicutes	Clostridia	Clostridiales	Lachnospiraceae			0	40	28.8	6.6	3.6
163696	Actinobacteria	Coriobacteriia	Coriobacteriales	Coriobacteriaceae			0	26.75	37.6	5.8	3.2
164216	Firmicutes	Clostridia	Clostridiales	Lachnospiraceae			0	46.5	35	3	1.2
164254	Firmicutes	Clostridia	Clostridiales	Veillonellaceae			4	0	0.2	0	0
164946	Bacteroidetes	Bacteroidia	Bacteroidales	Prevotellaceae	Prevotella		2.66667	0	0	0.4	0
165462	Bacteroidetes	Bacteroidia	Bacteroidales	Prevotellaceae	Prevotella		4.33333	0	0	0	0
166629	Firmicutes	Clostridia	Clostridiales	Christensenellaceae			0	6.75	1.8	1.6	1.6
167679	Bacteroidetes	Bacteroidia	Bacteroidales	Prevotellaceae	Prevotella		4.33333	0.5	0.2	0	0
168625	Firmicutes	Clostridia	Clostridiales				1.33333	23.5	17.2	2.2	0.6
169738	Firmicutes	Clostridia	Clostridiales	Lachnospiraceae	Butyrivibrio		1.66667	241	220	45.6	19
169814	Bacteroidetes	Bacteroidia	Bacteroidales				5.66667	0	0	0	0
169897	Firmicutes	Clostridia	Clostridiales				0.666667	8.5	5.2	0.4	0.4
170512	Planctomycetes	Planctomycetia	Pirellulales	Pirellulaceae			1.66667	12.75	18.8	4.8	1.6
171639	Bacteroidetes	Bacteroidia	Bacteroidales	Prevotellaceae	Prevotella		3.66667	0	0	0	0
172624	Firmicutes	Clostridia	Clostridiales	Lachnospiraceae			2.33333	0	0	0	0
172998	Bacteroidetes	Bacteroidia	Bacteroidales	Prevotellaceae	Prevotella		13.3333	0.5	2.2	0	0.4
173519	Firmicutes	Clostridia	Clostridiales	Lachnospiraceae			1.66667	0	0	0	0
174033	Firmicutes	Clostridia	Clostridiales				0	7.5	7.8	0.6	0.6
176104	Firmicutes	Clostridia	Clostridiales	Ruminococcaceae			0	0	0	1.6	2.8
185222	Firmicutes	Clostridia	Clostridiales	Clostridiaceae			0	0	0	2.6	2.6
185281	Firmicutes	Clostridia	Clostridiales	Lachnospiraceae	Dorea		0	2.5	0.6	0.2	0
191281	Firmicutes	Clostridia	Clostridiales	Ruminococcaceae			0	0	0	9.4	5.4
194322	Firmicutes	Clostridia	Clostridiales	Ruminococcaceae			0	5.5	6	1	0.2
205250	Firmicutes	Clostridia	Clostridiales				0	6.5	8.6	1	0
205594	Firmicutes	Clostridia	Clostridiales				9.66667	0	0.6	0	0
206587	Bacteroidetes	Bacteroidia	Bacteroidales	Prevotellaceae	Prevotella		17.3333	0.5	0.8	0	0.2
207019	Tenericutes	Mollicutes	Acholeplasmatales				1.66667	0	0	0	0
207286	Firmicutes	Clostridia	Clostridiales				0	4.5	1.8	0.2	0
208802	Firmicutes	Clostridia	Clostridiales	Christensenellaceae			19.3333	59	29.6	3.4	2.4
209059	Firmicutes	Clostridia	Clostridiales				1	47	34.6	9.8	3.4
209712	Firmicutes	Clostridia	Clostridiales	Ruminococcaceae	Oscillospira		18	1	0.6	0	0
212167	Bacteroidetes	Bacteroidia	Bacteroidales	Prevotellaceae	Prevotella		2.66667	0	0	0	0
212460	Firmicutes	Clostridia	Clostridiales	Lachnospiraceae	Butyrivibrio		5	0	0	0	0
215731	Firmicutes	Clostridia	Clostridiales				3.66667	0	0	12.6	10.8
236097	Firmicutes	Clostridia	Clostridiales	Lachnospiraceae			0	8.25	5.6	0.8	0
236578	Firmicutes	Clostridia	Clostridiales	Lachnospiraceae	Butyrivibrio		0.333333	11.75	1.2	0	0
240168	Bacteroidetes	Bacteroidia	Bacteroidales	BS11			8.33333	0	0	0	0
241034	Bacteroidetes	Bacteroidia	Bacteroidales	BS11			2.33333	0	0	0	0
241489	Firmicutes	Clostridia	Clostridiales	Ruminococcaceae	Ruminococcus		0	5.5	2	0.4	0
244120	Firmicutes	Clostridia	Clostridiales	Clostridiaceae	Clostridium		1	0	0	5.4	2.8
244802	Bacteroidetes	Bacteroidia	Bacteroidales				6.33333	0	0	0	0
248112	Bacteroidetes	Bacteroidia	Bacteroidales				11.3333	0.75	1	0	0.2
248447	Bacteroidetes	Bacteroidia	Bacteroidales	Prevotellaceae	Prevotella		7.66667	0	0.4	0	0
248900	Firmicutes	Clostridia	Clostridiales				0	9.25	4.8	2.2	0.6
248902	Firmicutes	Bacilli	Turicibacterales	Turicibacteraceae	Turicibacter		0	0.5	38	16	8.6
249189	Firmicutes	Clostridia	Clostridiales				0	8	22.4	1.8	0.2
250378	Firmicutes	Clostridia	Clostridiales	Lachnospiraceae			7	2.25	1	0	0
251961	Firmicutes	Clostridia	Clostridiales				0.666667	27.25	26.2	4	1
251970	Firmicutes	Clostridia	Clostridiales	Ruminococcaceae			12.3333	30.5	31.2	2.6	1
255603	Firmicutes	Clostridia	Clostridiales	Lachnospiraceae			0	4	2.2	0	0
259498	Bacteroidetes	Bacteroidia	Bacteroidales	Prevotellaceae	Prevotella		21	0	0	0	0
260804	Firmicutes	Clostridia	Clostridiales	Ruminococcaceae			0	5.5	4.4	0.2	0
260907	Firmicutes	Clostridia	Clostridiales				0	11	13	1.6	1
261161	Firmicutes	Clostridia	Clostridiales				0	0	0	8.8	7.8
261680	Bacteroidetes	Bacteroidia	Bacteroidales	BS11			6.33333	0.5	0.2	0	0
262032	Fibrobacteres	Fibrobacteria	Fibrobacterales	Fibrobacteraceae	Fibrobacter	succinogenes	7	0	0.6	0	0
263252	Firmicutes	Clostridia	Clostridiales	Ruminococcaceae			0	0	0	3.4	3.6
264114	Firmicutes	Clostridia	Clostridiales	Ruminococcaceae			3	0	0	0	0
264507	Firmicutes	Clostridia	Clostridiales				2	0	0	0	0
264735	SR1						32	0	0	0.2	0
265071	Bacteroidetes	Bacteroidia	Bacteroidales	[Paraprevotellaceae]	YRC22		2	0	0	0	0
265265	Firmicutes	Clostridia	Clostridiales	Lachnospiraceae			5	0	0	0	0
265303	Bacteroidetes	Bacteroidia	Bacteroidales				2.66667	0	0.2	0	0
265316	Firmicutes	Clostridia	Clostridiales				0	18	15.8	2.8	1.4
265483	Firmicutes	Clostridia	Clostridiales	Ruminococcaceae	Oscillospira		0	0	0	10.2	7.2
265925	Tenericutes	Mollicutes	RF39				0.333333	4.5	4.8	0.4	0
266392	Firmicutes	Clostridia	Clostridiales	Lachnospiraceae	Coprococcus		3	0	0	0	0.2
268684	Tenericutes	Mollicutes	Anaeroplasmatales	Anaeroplasmataceae	Anaeroplasma		9	0	0	0	0
269346	Firmicutes	Clostridia	Clostridiales				0.333333	2.75	1	0	0.4
269674	Verrucomicrobia	Verruco-5	WCHB1-41	RFP12			2.66667	0	0	0	0
270261	Firmicutes	Clostridia	Clostridiales				0	0	0	14.6	11.8
271582	SR1						38.3333	0.25	0.4	0	0.2
272513	Firmicutes	Clostridia	Clostridiales	Ruminococcaceae			0.666667	5.5	5.4	0.4	0
273277	Bacteroidetes	Bacteroidia	Bacteroidales				13.6667	0.25	0.4	0	0
273321	Fibrobacteres	Fibrobacteria	Fibrobacterales	Fibrobacteraceae	Fibrobacter	succinogenes	5.33333	0	0	0	0
274010	Chloroflexi	Anaerolineae	Anaerolineales	Anaerolinaceae	SHD-231		1.66667	130.5	95.4	29.2	21
274828	Firmicutes	Clostridia	Clostridiales	Lachnospiraceae			0	2	2.4	0	0
274836	Firmicutes	Clostridia	Clostridiales	Lachnospiraceae			1.33333	0	0	0	0
277047	Tenericutes	Mollicutes	RF39				0	0	0	5.6	5.6
277132	Tenericutes	Mollicutes	RF39				0	5.5	4.2	0.2	0.6
287334	Bacteroidetes	Bacteroidia	Bacteroidales	[Paraprevotellaceae]	YRC22		0	0	0	3.2	7
287402	Firmicutes	Clostridia	Clostridiales				0	0	0	14.2	12.2
287662	Bacteroidetes	Bacteroidia	Bacteroidales				0	0	0	9.6	8
287692	Bacteroidetes	Bacteroidia	Bacteroidales				0	0	0	12.4	41.8
287744	Firmicutes	Clostridia	Clostridiales	[Mogibacteriaceae]			0	0	0	13.2	6.8
287880	Firmicutes	Clostridia	Clostridiales				0	0	0	3.6	3.2
288076	Firmicutes	Clostridia	Clostridiales	Ruminococcaceae			0	0	0	4.4	3
288198	Firmicutes	Clostridia	Clostridiales	Ruminococcaceae			0	0	0	7	6
288494	Verrucomicrobia	Verrucomicrobiae	Verrucomicrobiales	Verrucomicrobiaceae	Akkermansia		0	0	0	102.2	73.4
288779	Firmicutes	Clostridia	Clostridiales	Ruminococcaceae			0	0	0	5.2	2
289091	Firmicutes	Clostridia	Clostridiales	Lachnospiraceae			0	18.75	16	1.6	0
289157	Firmicutes	Clostridia	Clostridiales				0	7	7.2	1.4	1.4
289208	Firmicutes	Clostridia	Clostridiales	Ruminococcaceae			0	0	0	7	5.2
289310	Firmicutes	Clostridia	Clostridiales	Ruminococcaceae			0	0	0	6.6	5.2
289362	Verrucomicrobia	Verrucomicrobiae	Verrucomicrobiales	Verrucomicrobiaceae	Akkermansia		0	0	0	39.8	26
289500	Bacteroidetes	Bacteroidia	Bacteroidales				18.3333	0	0	0	0
289581	Bacteroidetes	Bacteroidia	Bacteroidales				0	0	0	8.4	11
289730	Firmicutes	Clostridia	Clostridiales	Peptostreptococcaceae			0	0.75	36	22	9.6
289774	Firmicutes	Clostridia	Clostridiales	Ruminococcaceae			0	0	0	4.8	4.4
289875	Bacteroidetes	Bacteroidia	Bacteroidales	[Paraprevotellaceae]			16.6667	0	0	0	0
290532	Firmicutes	Clostridia	Clostridiales	Ruminococcaceae			0	3.75	4.4	0.4	0
290908	Firmicutes	Clostridia	Clostridiales				0	0	0	20	11.4
290977	Bacteroidetes	Bacteroidia	Bacteroidales				0	0	0	27.2	42.4
291387	Firmicutes	Clostridia	Clostridiales	Lachnospiraceae	Dorea		0	0	0	6.6	5.8
291462	Firmicutes	Clostridia	Clostridiales	Lachnospiraceae	Butyrivibrio		0	60.25	47.6	5.6	2.2
291518	Firmicutes	Clostridia	Clostridiales	Ruminococcaceae			0	0	0	3.2	1.4
291587	Bacteroidetes	Bacteroidia	Bacteroidales				0	0	0	7.8	10.4
291630	Firmicutes	Clostridia	Clostridiales	Ruminococcaceae			0	0	0	4	4.8
291643	Firmicutes	Clostridia	Clostridiales				0	0	0	10.8	6.8
291709	Firmicutes	Clostridia	Clostridiales				0	0.25	0	3.8	6
292128	Firmicutes	Clostridia	Clostridiales	[Mogibacteriaceae]	Mogibacterium		0.333333	49	52.4	10	4.6
292186	Firmicutes	Clostridia	Clostridiales				1.33333	8.25	6.4	2.2	0.8
292699	Bacteroidetes	Bacteroidia	Bacteroidales	Prevotellaceae	Prevotella		33.6667	1	0	0	0
292851	Firmicutes	Clostridia	Clostridiales				1.33333	75.75	88.2	17	9.6
293104	Firmicutes	Clostridia	Clostridiales	Lachnospiraceae	Roseburia		0	0	0	1.6	3
293285	Firmicutes	Clostridia	Clostridiales	Ruminococcaceae	Oscillospira		0.666667	0	0	5.2	7.8
293575	Firmicutes	Clostridia	Clostridiales	Ruminococcaceae			0	0	0	4	3
293621	Firmicutes	Clostridia	Clostridiales	Ruminococcaceae			0	0	0	18.4	13.4
293789	Firmicutes	Clostridia	Clostridiales	Ruminococcaceae	Ruminococcus		0	0	0	6.2	7.6
294229	Firmicutes	Clostridia	Clostridiales				0	0	0	17	21.6
294360	Firmicutes	Clostridia	Clostridiales	Ruminococcaceae			0	0	0	6.8	7
294390	Firmicutes	Clostridia	Clostridiales	Ruminococcaceae			0	0	0	6.2	5.8
294451	Verrucomicrobia	Verrucomicrobiae	Verrucomicrobiales	Verrucomicrobiaceae	Akkermansia		0	0	0.2	29	22.4
294457	Firmicutes	Clostridia	Clostridiales	Ruminococcaceae			0	0	0	4.4	3.4
294536	Bacteroidetes	Bacteroidia	Bacteroidales	BS11			6.33333	0	0	0	0
294659	Cyanobacteria	4C0d-2	YS2				0	0	0	6	3.6
294944	Bacteroidetes	Bacteroidia	Bacteroidales				0	0	0	8.4	10
295417	Firmicutes	Clostridia	Clostridiales	Lachnospiraceae			3	0	0	0	0
295613	Firmicutes	Clostridia	Clostridiales	[Mogibacteriaceae]			0	0	0	2.2	1.2
295810	Bacteroidetes	Bacteroidia	Bacteroidales	Prevotellaceae	Prevotella		0	0	0	15.2	11.4
295835	Firmicutes	Clostridia	Clostridiales				0	0	0	5.2	8.2
295879	Firmicutes	Clostridia	Clostridiales	Ruminococcaceae	Oscillospira		0	0	0	4.8	5
295977	Firmicutes	Clostridia	Clostridiales				0	28.5	8.2	1.6	1.2
296023	Firmicutes	Clostridia	Clostridiales	Ruminococcaceae			0	0	0	6.8	6.8
296205	Bacteroidetes	Bacteroidia	Bacteroidales				0	0	0	16.6	31
296496	Firmicutes	Clostridia	Clostridiales	Ruminococcaceae			0	0	0	4.2	4.2
296633	Firmicutes	Clostridia	Clostridiales	Ruminococcaceae			0	0	0	5.4	4.4
296698	Bacteroidetes	Bacteroidia	Bacteroidales				0	0	0	70.6	63.8
297045	Firmicutes	Clostridia	Clostridiales	Ruminococcaceae	Oscillospira		0	0	0	2	3
297256	Firmicutes	Clostridia	Clostridiales	Ruminococcaceae			0	0	0	0.6	3
297266	Bacteroidetes	Bacteroidia	Bacteroidales	Rikenellaceae			0	0	0	12.6	11.8
297581	Bacteroidetes	Bacteroidia	Bacteroidales	[Odoribacteraceae]	Odoribacter		0	0	0	0.8	1.2
297897	Bacteroidetes	Bacteroidia	Bacteroidales				0	0	0	10.4	9
298036	Firmicutes	Clostridia	Clostridiales	Ruminococcaceae			31.3333	0.25	0	0	0
298161	Bacteroidetes	Bacteroidia	Bacteroidales	Bacteroidaceae			0	0	0	12	17.4
298190	Firmicutes	Clostridia	Clostridiales				0	0	0	8.6	7.4
298284	Firmicutes	Clostridia	Clostridiales				0	39	45	7.2	4.4
298545	Bacteroidetes	Bacteroidia	Bacteroidales	Bacteroidaceae	5-7N15		0	0	0	3.2	8.2
299259	Verrucomicrobia	Opitutae	[Cerasicoccales]	[Cerasicoccaceae]			9.66667	0	0	0	0
299280	Firmicutes	Clostridia	Clostridiales	Ruminococcaceae			2	12.25	7.4	0.6	0
299398	Firmicutes	Clostridia	Clostridiales	Lachnospiraceae	Coprococcus		0	7.5	4.6	0.4	0.2
300041	Firmicutes	Clostridia	Clostridiales	Ruminococcaceae			0	0	0	4.2	4.8
300053	Bacteroidetes	Bacteroidia	Bacteroidales	p-2534-18B5			0	0	0	48.4	64.6
300285	Firmicutes	Clostridia	Clostridiales	[Mogibacteriaceae]			0.333333	6.5	4.4	0.4	0.2
300384	Bacteroidetes	Bacteroidia	Bacteroidales	Bacteroidaceae	5-7N15		0	0	0	8.4	11.8
300390	Firmicutes	Clostridia	Clostridiales				0.333333	22.25	23.2	4.2	1.8
300463	Bacteroidetes	Bacteroidia	Bacteroidales	RF16			0	0	0	3.2	8.6
300646	Firmicutes	Clostridia	Clostridiales				0	0	0	2	3.4
300691	Bacteroidetes	Bacteroidia	Bacteroidales	[Paraprevotellaceae]	CF231		0	0	0	10.2	14.2
300694	Firmicutes	Clostridia	Clostridiales	Peptococcaceae	rc4-4		0	0	0	43	54.6
301161	Firmicutes	Clostridia	Clostridiales	Ruminococcaceae			0	0	0	1.6	2.6
301425	Bacteroidetes	Bacteroidia	Bacteroidales	Bacteroidaceae			0	0	0	3	4.8
301603	Spirochaetes	Spirochaetes	Spirochaetales	Spirochaetaceae	Treponema		0	0	0	9	11.8
301614	Cyanobacteria	4C0d-2	YS2				10	4.75	2.6	1	0.2
301678	Firmicutes	Clostridia	Clostridiales	Ruminococcaceae	Ruminococcus		0	0	0	5.4	9.4
301900	Firmicutes	Clostridia	Clostridiales	[Mogibacteriaceae]			0	0	0	14.2	7.2
302273	Firmicutes	Clostridia	Clostridiales	Ruminococcaceae			0	0	0	4.2	3.8
302388	Firmicutes	Clostridia	Clostridiales	Ruminococcaceae			0	0	0	14	16.8
302470	Spirochaetes	Spirochaetes	Spirochaetales	Spirochaetaceae	Treponema		0	0	0	6.4	7
302501	Verrucomicrobia	Verrucomicrobiae	Verrucomicrobiales	Verrucomicrobiaceae	Akkermansia		0	0	0	23.8	18.8
302655	Firmicutes	Erysipelotrichi	Erysipelotrichales	Erysipelotrichaceae			0	0	0	3.8	2.6
302856	Firmicutes	Clostridia	Clostridiales	Ruminococcaceae			0	0	0	21.4	25.6
302943	Firmicutes	Clostridia	Clostridiales				0	15.5	11.2	1.8	0.6
303279	Firmicutes	Clostridia	Clostridiales	Ruminococcaceae	Oscillospira		0	0	0	2.4	4.2
303313	Firmicutes	Clostridia	Clostridiales	Lachnospiraceae	Blautia		0	7.75	3.8	0	0
303686	Firmicutes	Clostridia	Clostridiales	[Mogibacteriaceae]			0	0	0	3.6	1.6
304123	Firmicutes	Clostridia	Clostridiales	Lachnospiraceae			0	0	0	7.6	9
306219	Bacteroidetes	Bacteroidia	Bacteroidales				8.33333	0	1.2	0	0
306528	Firmicutes	Clostridia	Clostridiales	Ruminococcaceae			10	2	1.4	0	0
306769	Firmicutes	Clostridia	Clostridiales				0	0	0	14.8	12.6
307144	Firmicutes	Clostridia	Clostridiales	Ruminococcaceae			3.66667	0.25	1	0	0
307485	Firmicutes	Clostridia	Clostridiales	[Mogibacteriaceae]	Mogibacterium		0	3.25	3.6	0.8	0.2
307953	Bacteroidetes	Bacteroidia	Bacteroidales	[Paraprevotellaceae]	CF231		14.3333	0	0	0	0
308706	Firmicutes	Clostridia	Clostridiales	Ruminococcaceae			0	0	0	11	4
308786	Firmicutes	Clostridia	Clostridiales	Ruminococcaceae	Ruminococcus		0.333333	4.5	3.2	0.2	0.2
309134	Bacteroidetes	Bacteroidia	Bacteroidales	Prevotellaceae	Prevotella	copri	0	0	0	12.4	14
309161	Firmicutes	Clostridia	Clostridiales	Lachnospiraceae			0	14.75	13	2.8	1
309179	Firmicutes	Clostridia	Clostridiales	Clostridiaceae			1.66667	23.5	22.4	10	5.6
309658	Firmicutes	Clostridia	Clostridiales	Clostridiaceae	Clostridium		0	0	0	0.4	2.2
309710	Firmicutes	Clostridia	Clostridiales				0	3.75	7	0	0.2
310111	Bacteroidetes	Bacteroidia	Bacteroidales	Prevotellaceae	Prevotella		5	0	0	0	0
310222	Firmicutes	Clostridia	Clostridiales				0	0	0	5.4	6.8
310662	Firmicutes	Clostridia	Clostridiales				0.666667	14.5	17.6	1.2	2.2
310757	Firmicutes	Clostridia	Clostridiales	[Mogibacteriaceae]			0.666667	11	10.2	1.6	1
311395	Firmicutes	Clostridia	Clostridiales				0	8.75	3.2	0.2	0.4
311707	Firmicutes	Clostridia	Clostridiales	Ruminococcaceae			0	0	0	7	7.8
312272	Bacteroidetes	Bacteroidia	Bacteroidales				22	0.5	1	0	0
312588	Firmicutes	Clostridia	Clostridiales	Lachnospiraceae			0.666667	12.25	5.2	2	1
313390	Bacteroidetes	Bacteroidia	Bacteroidales				0	0.5	0	10.8	25.4
313601	Firmicutes	Clostridia	Clostridiales	Ruminococcaceae			0	0	0	14.2	12.4
313890	Bacteroidetes	Bacteroidia	Bacteroidales	Prevotellaceae	Prevotella		1.33333	0	0	0	0
314680	Firmicutes	Clostridia	Clostridiales	[Mogibacteriaceae]			4.33333	1	0	0	0
315654	Firmicutes	Clostridia	Clostridiales	[Mogibacteriaceae]			1.33333	0	0	0	0
315831	Firmicutes	Clostridia	Clostridiales	[Mogibacteriaceae]			0	0	0	5.4	4.4
315975	Firmicutes	Clostridia	Clostridiales				0	13.75	8.2	1.6	0.6
316412	Bacteroidetes	Bacteroidia	Bacteroidales				6	1.25	0.4	0	0
316582	Firmicutes	Clostridia	Clostridiales	[Mogibacteriaceae]	Mogibacterium		0	2.5	4.4	0.2	0.2
316882	Firmicutes	Clostridia	Clostridiales	Ruminococcaceae			0	0	0	5	4
317517	Firmicutes	Clostridia	Clostridiales				0	12.75	8.6	1.6	0.8
318131	Firmicutes	Clostridia	Clostridiales				0	0	0	3.2	5
318202	Bacteroidetes	Bacteroidia	Bacteroidales				4.33333	0.25	0	0	0.2
318599	Firmicutes	Clostridia	Clostridiales	Lachnospiraceae			0	2.5	3.2	0.2	0.4
319521	Firmicutes	Clostridia	Clostridiales	Ruminococcaceae			0	0	0	3.8	6.4
319603	Firmicutes	Clostridia	Clostridiales	Lachnospiraceae	Anaerostipes		0.666667	52.25	47.4	6.6	6.2
320207	Firmicutes	Clostridia	Clostridiales	Ruminococcaceae			0.333333	8.5	5	0.8	0.2
320615	Bacteroidetes	Bacteroidia	Bacteroidales	[Paraprevotellaceae]	CF231		2	0	0	13.4	20.8
320633	Spirochaetes	MVP-15	PL-11B10				3.33333	0	0	0	0
320783	Firmicutes	Clostridia	Clostridiales	[Mogibacteriaceae]			0	6.75	7.2	0.6	0.8
320856	Firmicutes	Clostridia	Clostridiales	Lachnospiraceae			5	33	34.6	2.6	1.2
321621	Bacteroidetes	Bacteroidia	Bacteroidales	[Paraprevotellaceae]	YRC22		0	0	0.2	87.8	108.6
321960	Firmicutes	Clostridia	Clostridiales	Ruminococcaceae			0	0	0	3.8	4
322004	Firmicutes	Clostridia	Clostridiales	Ruminococcaceae			0	0	0	5.2	7.4
323386	Firmicutes	Clostridia	Clostridiales	Ruminococcaceae			0	0	0	0.8	5
323910	Firmicutes	Clostridia	Clostridiales	Ruminococcaceae			0	0	0	4	4
324099	Firmicutes	Clostridia	Clostridiales	Christensenellaceae			0	4	3.6	1	0.2
324219	Firmicutes	Clostridia	Clostridiales	Ruminococcaceae			0.666667	0.75	1	14	15
324863	Firmicutes	Clostridia	Clostridiales	Lachnospiraceae			0	3.5	6.2	0.2	1
325578	Firmicutes	Clostridia	Clostridiales				0	10	6.8	1.6	1.2
326265	Firmicutes	Clostridia	Clostridiales	Ruminococcaceae			0	0	0	3.6	4.4
326774	Firmicutes	Clostridia	Clostridiales	Ruminococcaceae	Ruminococcus		1	17	13.4	2.6	2.2
329058	Firmicutes	Erysipelotrichi	Erysipelotrichales	Erysipelotrichaceae	Bulleidia		0	8	9.6	2.2	2.6
329112	Firmicutes	Clostridia	Clostridiales	Ruminococcaceae			0	0	0	4.8	4.8
331227	Firmicutes	Clostridia	Clostridiales	[Mogibacteriaceae]			0.666667	15.75	17.4	5.2	2
333235	Bacteroidetes	Bacteroidia	Bacteroidales	Rikenellaceae			0	0	0	18	20.8
333616	Firmicutes	Clostridia	Clostridiales	Ruminococcaceae			0	0	0.2	6.4	6.8
335018	Firmicutes	Clostridia	Clostridiales	Ruminococcaceae			0	0	0	6.8	6
335032	Firmicutes	Clostridia	Clostridiales				0	23.75	21.2	3.4	0.4
335853	Spirochaetes	MVP-15	PL-11B10				2	0	0	0	0
335931	Firmicutes	Clostridia	Clostridiales	Lachnospiraceae			4	10.75	3.6	0	0
337465	Firmicutes	Clostridia	Clostridiales	Lachnospiraceae	Blautia		0	1.75	0.6	0	0
337468	Firmicutes	Clostridia	Clostridiales	Ruminococcaceae	Oscillospira		0	0	0	5.4	7.2
338039	Firmicutes	Clostridia	Clostridiales	Lachnospiraceae	Coprococcus		0.333333	29.25	28.4	1.2	0.8
338111	Firmicutes	Clostridia	Clostridiales	Ruminococcaceae			0	0	0	3.8	4.2
338487	Firmicutes	Clostridia	Clostridiales	Lachnospiraceae			0	0	0	2	4.2
338758	Bacteroidetes	Bacteroidia	Bacteroidales	Prevotellaceae	Prevotella		26	0	0	0	0
338935	Firmicutes	Clostridia	Clostridiales	Ruminococcaceae			4	0	0	0	0
339375	Spirochaetes	Spirochaetes	Spirochaetales	Spirochaetaceae	Treponema		0	0	0	5.6	7.4
339530	Firmicutes	Clostridia	Clostridiales				0	0.5	0	4.2	3.4
340436	Firmicutes	Clostridia	Clostridiales	[Mogibacteriaceae]			0.333333	5.25	11	0.6	0.8
340940	Firmicutes	Clostridia	Clostridiales	Ruminococcaceae			0	0	0	1.6	3.2
341449	Firmicutes	Clostridia	Clostridiales	Lachnospiraceae			0.333333	6.5	5	0.2	0
344036	Bacteroidetes	Bacteroidia	Bacteroidales	Prevotellaceae	Prevotella		4.66667	0.25	0	0	0
344506	Bacteroidetes	Bacteroidia	Bacteroidales				27.3333	0	0.4	0	0
344858	Firmicutes	Clostridia	Clostridiales				0	7	8.8	0.8	0
347042	Firmicutes	Clostridia	Clostridiales	Ruminococcaceae			0	0	0	5.2	7.8
348074	Tenericutes	Mollicutes	Anaeroplasmatales	Anaeroplasmataceae	Anaeroplasma		15	0	0	0	0
348641	Firmicutes	Clostridia	Clostridiales	Lachnospiraceae			0.333333	20	14.2	3.2	0.4
349451	Firmicutes	Clostridia	Clostridiales	Ruminococcaceae			0	0	0	8.8	10.4
349658	Verrucomicrobia	Verruco-5	WCHB1-41	RFP12			1.33333	0	0	0	0
350175	Firmicutes	Clostridia	Clostridiales	Lachnospiraceae			0	29.75	32.2	4.2	0.2
351091	Cyanobacteria	4C0d-2	YS2				19.3333	9	3.2	1.6	0.6
351498	Firmicutes	Clostridia	Clostridiales	[Mogibacteriaceae]			0	5	4.6	1	0.2
351800	Actinobacteria	Coriobacteriia	Coriobacteriales	Coriobacteriaceae			0	8.5	8.8	1.4	0.4
351823	Firmicutes	Clostridia	Clostridiales	Christensenellaceae			0	0	0	3.8	8.2
352999	Firmicutes	Clostridia	Clostridiales	Lachnospiraceae			0	12.5	7	0	0.4
353696	Firmicutes	Clostridia	Clostridiales	Christensenellaceae			1.66667	57	32.8	6.2	5.2
354054	Firmicutes	Clostridia	Clostridiales	Ruminococcaceae			0	0	0	8.2	10
356624	Firmicutes	Clostridia	Clostridiales	[Mogibacteriaceae]			0.666667	11.25	8.4	1.8	1.2
369416	Firmicutes	Clostridia	Clostridiales	Ruminococcaceae			0	0	0	3.8	6.4
450576	Firmicutes	Clostridia	Clostridiales	Ruminococcaceae			0	0	0	5	4.2
510554	Bacteroidetes	Bacteroidia	Bacteroidales	Prevotellaceae	Prevotella		3.66667	0	0	0	0
511433	Firmicutes	Clostridia	Clostridiales				0	0	0	3.8	5.6
512048	Actinobacteria	Coriobacteriia	Coriobacteriales	Coriobacteriaceae			0.333333	17.5	13.2	4.4	2
520966	Firmicutes	Clostridia	Clostridiales	[Mogibacteriaceae]	Mogibacterium		0.333333	12.5	24.6	4	3.4
521275	Actinobacteria	Coriobacteriia	Coriobacteriales	Coriobacteriaceae			0	17	13.2	2.6	0.6
522040	Actinobacteria	Actinobacteria	Actinomycetales	Actinomycetaceae			0	0	2.6	0.2	0
522255	Firmicutes	Clostridia	Clostridiales	[Mogibacteriaceae]			0	43	33.2	4	3.4
528013	Actinobacteria	Coriobacteriia	Coriobacteriales	Coriobacteriaceae			0.333333	41.5	38.4	7.8	9
529192	Firmicutes	Clostridia	Clostridiales				0	0	0	4.6	2
529263	Firmicutes	Clostridia	Clostridiales	[Mogibacteriaceae]			0	10.75	7.6	1	1.6
529921	Firmicutes	Clostridia	Clostridiales	Lachnospiraceae			0	0	0	0.4	3
533469	Firmicutes	Clostridia	Clostridiales	Lachnospiraceae			4	0	0	0	0
538343	Bacteroidetes	Bacteroidia	Bacteroidales	Prevotellaceae	Prevotella		8	0	0	0	0
538374	Firmicutes	Clostridia	Clostridiales	Ruminococcaceae			21.3333	0.75	0	0	0
541167	Firmicutes	Clostridia	Clostridiales	[Mogibacteriaceae]			0	14.5	14.4	3.4	0.8
544734	Firmicutes	Clostridia	Clostridiales	Ruminococcaceae			0	0	0	2.4	5
545085	Bacteroidetes	Bacteroidia	Bacteroidales	Prevotellaceae	Prevotella		3.66667	0	0	0	0
545127	Firmicutes	Clostridia	Clostridiales	[Mogibacteriaceae]			0	54.25	51.2	7.2	4.2
545236	Firmicutes	Clostridia	Clostridiales	Lachnospiraceae			0	2.5	3.4	0	0
547649	Firmicutes	Erysipelotrichi	Erysipelotrichales	Erysipelotrichaceae	RFN20		2	0	0	0	0
550201	Spirochaetes	Spirochaetes	Spirochaetales	Spirochaetaceae	Treponema		53	0	0	0	0
555917	Proteobacteria	Deltaproteobacteria	Desulfovibrionales	Desulfovibrionaceae			0	0	0	7.8	24.6
557051	Firmicutes	Clostridia	Clostridiales	Ruminococcaceae			0	0	0	5	8.4
557137	Firmicutes	Clostridia	Clostridiales	Lachnospiraceae	Coprococcus		0	9.75	10.8	1.6	0
563055	Bacteroidetes	Bacteroidia	Bacteroidales				10	0	0	0	0
563403	Bacteroidetes	Bacteroidia	Bacteroidales				1.66667	0	0	0	0
565801	Firmicutes	Clostridia	Clostridiales				9.66667	0	0	0	0
566154	Actinobacteria	Coriobacteriia	Coriobacteriales	Coriobacteriaceae	Atopobium		0	5	6.6	2.6	0.4
568719	Actinobacteria	Coriobacteriia	Coriobacteriales	Coriobacteriaceae			0	1.5	4	0.2	0.2
570450	Firmicutes	Clostridia	Clostridiales				0	7.25	4	0.4	0
579431	Firmicutes	Clostridia	Clostridiales	Lachnospiraceae			8	0	0	0	0
581609	Firmicutes	Clostridia	Clostridiales	Ruminococcaceae			1.66667	0	0	0	0
582069	Actinobacteria	Coriobacteriia	Coriobacteriales	Coriobacteriaceae	Atopobium		0	3.25	2.4	1.4	0.4
584954	Actinobacteria	Coriobacteriia	Coriobacteriales	Coriobacteriaceae			0.333333	23	23.8	2.8	1.2
587826	Actinobacteria	Actinobacteria	Bifidobacteriales	Bifidobacteriaceae			0	75.75	128	8	4.4
588060	Firmicutes	Clostridia	Clostridiales	Lachnospiraceae			3	0	0.2	0	0
589658	Firmicutes	Clostridia	Clostridiales				0	0	0	5	4
590209	Firmicutes	Clostridia	Clostridiales				0.666667	0	0	19.8	11
590921	Tenericutes	RF3	ML615J-28				0	0	0	0.6	4
591464	Firmicutes	Clostridia	Clostridiales				0	0	0	2	5.4
593516	WPS-2						9	0	0	0	0
593686	Firmicutes	Clostridia	Clostridiales	Lachnospiraceae	Coprococcus		0	3.25	3	0	0
594119	Firmicutes	Clostridia	Clostridiales	Ruminococcaceae			0	0	0	2.6	3.6
612629	Firmicutes	Clostridia	Clostridiales				0.333333	51.75	43.6	28.4	18.8
615455	Firmicutes	Clostridia	Clostridiales	Ruminococcaceae			0	0	0	6.6	7.2
634450	Firmicutes	Clostridia	Clostridiales	Ruminococcaceae			8.66667	0.5	0.2	0.2	0
635310	Bacteroidetes	Bacteroidia	Bacteroidales				4	0	0	0	0
671383	Bacteroidetes	Bacteroidia	Bacteroidales	Prevotellaceae	Prevotella		1.33333	0	0	0	0
683549	Bacteroidetes	Bacteroidia	Bacteroidales	RF16			59	1.5	2.8	0	0
693893	Bacteroidetes	Bacteroidia	Bacteroidales				0	0	0	5	10.8
695200	Firmicutes	Clostridia	Clostridiales	Lachnospiraceae	Butyrivibrio		0	20.75	18.4	2.2	1
707585	Bacteroidetes	Bacteroidia	Bacteroidales				13.3333	0	1	0.4	0
723577	Bacteroidetes	Bacteroidia	Bacteroidales	BS11			2.33333	0	0	0	0
727924	Spirochaetes	Spirochaetes	Spirochaetales	Spirochaetaceae	Treponema		7	0	0	0	0
731247	Spirochaetes	Spirochaetes	Spirochaetales	Spirochaetaceae			2.33333	0	0	0	0
731499	Bacteroidetes	Bacteroidia	Bacteroidales				0	0	0	3.4	3.2
732053	Bacteroidetes	Bacteroidia	Bacteroidales				7.33333	0	0	0	0
737242	Spirochaetes	Spirochaetes	Spirochaetales	Spirochaetaceae	Treponema		12	0	0	0	0
739683	Bacteroidetes	Bacteroidia	Bacteroidales				2.66667	0	0	0	0
754976	Bacteroidetes	Bacteroidia	Bacteroidales				10.6667	0.25	0.4	0	0.2
758489	Spirochaetes	Spirochaetes	Spirochaetales	Spirochaetaceae	Treponema		5.33333	0	0	0	0
758884	Firmicutes	Clostridia	Clostridiales				0	16.75	23.2	3.4	1.8
772393	Firmicutes	Clostridia	Clostridiales	Christensenellaceae			7.66667	0.25	0.2	0	0
777572	Bacteroidetes	Bacteroidia	Bacteroidales	Prevotellaceae	Prevotella		2	0	0	0	0
797570	Bacteroidetes	Bacteroidia	Bacteroidales	Prevotellaceae	Prevotella		9.66667	0	0	0	0
806675	Firmicutes	Clostridia	Clostridiales	Lachnospiraceae	Butyrivibrio		0	50.75	50.8	4	1.2
811108	Firmicutes	Clostridia	Clostridiales	Lachnospiraceae			0	1.25	1.6	0	0
817062	Firmicutes	Clostridia	Clostridiales	Ruminococcaceae			3.66667	0	0	0	0
821065	Bacteroidetes	Bacteroidia	Bacteroidales	Prevotellaceae	Prevotella		57.6667	0	0.8	0	0.6
821401	Firmicutes	Clostridia	Clostridiales	Lachnospiraceae	Butyrivibrio		2.66667	251.75	240.6	53	14.6
825355	Verrucomicrobia	Verruco-5	WCHB1-41	RFP12			1.33333	0	0	0	0
826531	Bacteroidetes	Bacteroidia	Bacteroidales	Prevotellaceae	Prevotella		13.3333	0	0.2	0	0
827852	Firmicutes	Clostridia	Clostridiales				2.66667	0	0	0	0
828448	Firmicutes	Clostridia	Clostridiales	Lachnospiraceae	Butyrivibrio		7.33333	2.75	0	0.2	0
831218	Tenericutes	Mollicutes	Anaeroplasmatales	Anaeroplasmataceae	Anaeroplasma		15	0	0	0	0
835896	Bacteroidetes	Bacteroidia	Bacteroidales	Prevotellaceae	Prevotella		10	0	0.2	0	0
838685	Firmicutes	Clostridia	Clostridiales	Ruminococcaceae	Oscillospira		0	0	0	2.8	4
937075	Firmicutes	Clostridia	Clostridiales				0.333333	0	0	5.4	4.4
1043378	Firmicutes	Clostridia	Clostridiales	Ruminococcaceae			0	0	0	4.4	3
1103978	Firmicutes	Clostridia	Clostridiales	Lachnospiraceae			0	0	0	10.6	10.4
1129180	Firmicutes	Clostridia	Clostridiales				0	0	0	4.8	3.4
1142110	Firmicutes	Clostridia	Clostridiales	Peptostreptococcaceae			0	0.5	28	20.4	6.8
1579256	Firmicutes	Clostridia	Clostridiales	Ruminococcaceae	Oscillospira		0	0	0	9.2	7.4
2424365	Firmicutes	Clostridia	Clostridiales	Lachnospiraceae	Butyrivibrio		6.66667	5.25	0.4	0.4	0.2
2591716	Firmicutes	Clostridia	Clostridiales	[Mogibacteriaceae]	Mogibacterium		2	75	94.8	21.2	6.8
2701897	Firmicutes	Clostridia	Clostridiales				2.33333	14.5	13.6	2	1.2
2781880	Firmicutes	Clostridia	Clostridiales	Ruminococcaceae			0	0	0	9	10
2822804	Firmicutes	Erysipelotrichi	Erysipelotrichales	Erysipelotrichaceae	[Eubacterium]	cylindroides	0	7	6	0.6	0
2863553	Firmicutes	Clostridia	Clostridiales	[Mogibacteriaceae]			0	5.75	7.2	1.6	0
2883964	Firmicutes	Clostridia	Clostridiales				3.66667	0.75	0	0	0
3007575	Firmicutes	Clostridia	Clostridiales				1.66667	13.75	12.8	1.4	0.6
3030115	Firmicutes	Clostridia	Clostridiales	[Mogibacteriaceae]			0	20.5	10.8	3.2	1.8
3220254	Firmicutes	Clostridia	Clostridiales				0.666667	11	8.8	1.2	0
3262505	Firmicutes	Clostridia	Clostridiales	Ruminococcaceae			0	0	0	2.4	2
3308041	Firmicutes	Clostridia	Clostridiales				0	0	0	3.2	2.8
3841096	Firmicutes	Clostridia	Clostridiales	Ruminococcaceae	Oscillospira		1	11.75	20.2	1	1
3903651	Firmicutes	Clostridia	Clostridiales	Ruminococcaceae	Oscillospira		0	0	0	4.2	3.6
4238405	Firmicutes	Clostridia	Clostridiales				0	25	24	4.8	2.2
4296771	Firmicutes	Clostridia	Clostridiales	Ruminococcaceae			0	0	0	5.4	6.8
4298017	Firmicutes	Clostridia	Clostridiales	Ruminococcaceae			0	0	0	5.2	3.6
4298020	Bacteroidetes	Bacteroidia	Bacteroidales				0	0	0	2.2	3
4302392	Firmicutes	Clostridia	Clostridiales	Lachnospiraceae	Coprococcus		0	0	0	5	5.2
4302718	Firmicutes	Clostridia	Clostridiales	Ruminococcaceae			0	0	0	8	8.2
4304085	Firmicutes	Clostridia	Clostridiales	Ruminococcaceae			6.66667	0.75	0.6	0	0
4304092	Bacteroidetes	Bacteroidia	Bacteroidales	BS11			62	2	2	0.2	0
4304867	Firmicutes	Clostridia	Clostridiales	Lachnospiraceae			0	0	0	5.4	7
4306002	Bacteroidetes	Bacteroidia	Bacteroidales				0	0	0	10.8	8.2
4306004	Firmicutes	Clostridia	Clostridiales	Ruminococcaceae			0	0	0	2.2	1.4
4306005	Bacteroidetes	Bacteroidia	Bacteroidales				0	0	0	14.2	22.2
4306044	Bacteroidetes	Bacteroidia	Bacteroidales	[Paraprevotellaceae]	CF231		0	0	0.8	119.6	162
4306729	Firmicutes	Clostridia	Clostridiales	Ruminococcaceae			0	0	0	3.6	1.8
4308038	Bacteroidetes	Bacteroidia	Bacteroidales	Bacteroidaceae			0	0	0.2	88.2	132.6
4310675	Firmicutes	Clostridia	Clostridiales				0	0	0	9.6	10.8
4310677	Firmicutes	Clostridia	Clostridiales	Ruminococcaceae			0	0	0	3.2	9.4
4314125	Firmicutes	Clostridia	Clostridiales	Ruminococcaceae			0	0	0	9.6	12.2
4314257	Firmicutes	Clostridia	Clostridiales	Ruminococcaceae	Oscillospira		0	0	0	5.6	7.4
4314397	Firmicutes	Clostridia	Clostridiales	Ruminococcaceae			3	0.5	0	0	0.2
4314602	Bacteroidetes	Bacteroidia	Bacteroidales				0	0	0	8.2	10.8
4315467	Bacteroidetes	Bacteroidia	Bacteroidales				21.6667	0	0.2	0	0
4315473	Bacteroidetes	Bacteroidia	Bacteroidales	BS11			8.66667	0.25	0	0	0
4315783	Firmicutes	Clostridia	Clostridiales	Ruminococcaceae			0	0	0	4	2.8
4315787	Firmicutes	Clostridia	Clostridiales	Ruminococcaceae			0	0	0	2	3.6
4316060	Firmicutes	Clostridia	Clostridiales	Lachnospiraceae	Pseudobutyrivibrio		31.6667	2.5	2.6	0.6	0
4317001	Planctomycetes	Planctomycetia	Pirellulales	Pirellulaceae			0	0	0	11.4	10
4317034	Bacteroidetes	Bacteroidia	Bacteroidales	Bacteroidaceae	5-7N15		0	0	0	25.2	34.2
4318315	Firmicutes	Clostridia	Clostridiales				0	0	0	7.8	8
4319108	Firmicutes	Clostridia	Clostridiales	Ruminococcaceae			0	0	0	16.2	14.6
4322125	Firmicutes	Clostridia	Clostridiales	Ruminococcaceae			0	0	0	7	6.8
4322943	Firmicutes	Clostridia	Clostridiales	Lachnospiraceae	Coprococcus		0	0	0	5.4	4
4324038	Bacteroidetes	Bacteroidia	Bacteroidales	Bacteroidaceae	Bacteroides		0	0.25	0	6.8	18
4324040	Firmicutes	Clostridia	Clostridiales	Ruminococcaceae			0	0	0	20.2	20.2
4324041	Bacteroidetes	Bacteroidia	Bacteroidales	RF16			0	0	0	5	4.8
4324985	Firmicutes	Clostridia	Clostridiales	Ruminococcaceae			51.3333	17	9.8	1.6	0
4326861	Firmicutes	Clostridia	Clostridiales				3	0	0.6	0	0.2
4326866	Firmicutes	Clostridia	Clostridiales	Ruminococcaceae			30.6667	64.75	42.8	3.8	3.4
4335321	Spirochaetes	Spirochaetes	Spirochaetales	Spirochaetaceae	Treponema		2	0	0	0	0
4335584	Firmicutes	Clostridia	Clostridiales	Ruminococcaceae			0	0	0	2.6	3.8
4336750	Firmicutes	Clostridia	Clostridiales	Ruminococcaceae	Oscillospira		0	0	0	9.8	8.8
4341679	Firmicutes	Clostridia	Clostridiales	Ruminococcaceae			0	0	0	5.2	4.6
4341683	Firmicutes	Clostridia	Clostridiales	Lachnospiraceae	Dorea		0	0	0	53.6	39
4342690	Firmicutes	Clostridia	Clostridiales	Ruminococcaceae			0	0	0	10.2	9.2
4345515	Firmicutes	Clostridia	Clostridiales	Ruminococcaceae			0	0	0.2	38.8	42.8
4346168	Tenericutes	Mollicutes	RF39				0.333333	0	0.2	7.2	6
4347265	Firmicutes	Clostridia	Clostridiales	Clostridiaceae			0	0	0	17	13.8
4356269	Tenericutes	Mollicutes	RF39				0.666667	0	0	5.8	5.4
4356914	Bacteroidetes	Bacteroidia	Bacteroidales				0	0	0	5.4	6.6
4360363	Firmicutes	Clostridia	Clostridiales				2	37.75	36.2	9.6	7.6
4366523	Firmicutes	Clostridia	Clostridiales	Lachnospiraceae			0	0	0	2.4	3.6
4367232	Firmicutes	Clostridia	Clostridiales	Clostridiaceae	Clostridium		5	0.5	0.4	0	0
4368466	Firmicutes	Clostridia	Clostridiales	[Mogibacteriaceae]			2	43.25	39.8	10	3
4368792	Firmicutes	Clostridia	Clostridiales				0.666667	6.5	8.8	1.4	1.6
4374114	Firmicutes	Clostridia	Clostridiales	Ruminococcaceae			0	0	0	2.8	2.2
4377709	Firmicutes	Clostridia	Clostridiales	Ruminococcaceae			0	0	0	4.6	2
4378907	Firmicutes	Clostridia	Clostridiales	Ruminococcaceae			0	0	0	5.2	2.6
4380006	Firmicutes	Clostridia	Clostridiales	[Mogibacteriaceae]			0	0	0	2.8	2.6
4380358	Firmicutes	Clostridia	Clostridiales	Ruminococcaceae			0	0	0	4.2	7.4
4381548	Firmicutes	Clostridia	Clostridiales	Ruminococcaceae			0	0	0	7.8	9.4
4388430	Firmicutes	Clostridia	Clostridiales	Ruminococcaceae	Ruminococcus	flavefaciens	0	0	0	14.4	15.2
4388432	Bacteroidetes	Bacteroidia	Bacteroidales				0	0	0	13.2	20.2
4388835	Firmicutes	Clostridia	Clostridiales	Ruminococcaceae			0	0	0	2.8	3.2
4393499	Firmicutes	Clostridia	Clostridiales	Ruminococcaceae			0	0	0	2.8	0.8
4395530	Bacteroidetes	Bacteroidia	Bacteroidales	Bacteroidaceae	5-7N15		0	0	0	26.2	47.2
4398588	Firmicutes	Clostridia	Clostridiales	Ruminococcaceae			0	0	0	7.8	4.6
4402751	Firmicutes	Clostridia	Clostridiales	Ruminococcaceae	Ruminococcus		0	0	0	8.8	12
4404830	Firmicutes	Clostridia	Clostridiales	Ruminococcaceae			0	0	0	102.8	102
4407030	Firmicutes	Clostridia	Clostridiales	Lachnospiraceae			0	8.25	7.2	0.2	0
4408418	Firmicutes	Clostridia	Clostridiales	Ruminococcaceae			0	0	0	6.4	6.2
4409730	Firmicutes	Clostridia	Clostridiales				0	0.25	96.2	41	13.6
4410881	Bacteroidetes	Bacteroidia	Bacteroidales	Rikenellaceae			0	0	0	1.8	4.2
4410988	Firmicutes	Clostridia	Clostridiales	Ruminococcaceae			0	0	0	2.4	2.6
4411102	Bacteroidetes	Bacteroidia	Bacteroidales				7.33333	0	0	0	0
4412336	Firmicutes	Clostridia	Clostridiales				0	0	0	0.4	3
4415144	Bacteroidetes	Bacteroidia	Bacteroidales	Bacteroidaceae	5-7N15		0	0	0	6	14
4416763	Firmicutes	Bacilli	Lactobacillales	Streptococcaceae	Streptococcus		0	1.25	1.8	0	0
4419504	Firmicutes	Clostridia	Clostridiales	Clostridiaceae	Clostridium		0	0	0	4.4	5.2
4424113	Firmicutes	Clostridia	Clostridiales				0	0	0	14.6	13.8
4426348	Verrucomicrobia	Verrucomicrobiae	Verrucomicrobiales	Verrucomicrobiaceae	Akkermansia		0	0	0	46.4	56
4427335	Firmicutes	Clostridia	Clostridiales				0	19.25	18	7.2	7.4
4431229	Firmicutes	Clostridia	Clostridiales	Veillonellaceae			5.66667	0.5	5.8	0.4	0.4
4434031	Firmicutes	Clostridia	Clostridiales	Ruminococcaceae			5.33333	0.75	2.2	22.4	19.4
4434334	Firmicutes	Clostridia	Clostridiales	Peptostreptococcaceae			0	0.75	48	23.6	8.4
4435305	Firmicutes	Clostridia	Clostridiales	Ruminococcaceae			0	0	0	2.8	4.2
4435575	Firmicutes	Clostridia	Clostridiales				0	0	0	7.4	9.6
4435578	Firmicutes	Clostridia	Clostridiales	Dehalobacteriaceae			0	0	0	11.6	11.8
4436380	Bacteroidetes	Bacteroidia	Bacteroidales	BS11			0	0	0	10	11.6
4437589	Bacteroidetes	Bacteroidia	Bacteroidales	Bacteroidaceae			0	0	0	21.6	51.6
4437592	Firmicutes	Clostridia	Clostridiales	Ruminococcaceae			32.6667	5	1.2	16.2	26.6
4437823	Firmicutes	Clostridia	Clostridiales	Lachnospiraceae			0	3.5	3.8	0.6	0
4438136	Bacteroidetes	Bacteroidia	Bacteroidales				2	0	0	0	0
4440297	Firmicutes	Clostridia	Clostridiales	Ruminococcaceae			0	0	0	8.6	8.8
4443082	Bacteroidetes	Bacteroidia	Bacteroidales				0	0	0	2.4	7
4444790	Firmicutes	Clostridia	Clostridiales	Veillonellaceae	Phascolarctobacterium		0	0	0.2	46.2	78.4
4445801	Firmicutes	Clostridia	Clostridiales				0	0	0	2.2	1.8
4446733	Firmicutes	Clostridia	Clostridiales				36.6667	224.25	170.6	29	16.6
4447373	Firmicutes	Clostridia	Clostridiales	Ruminococcaceae			0	0	0	9	6
4447992	Firmicutes	Bacilli	Lactobacillales	Streptococcaceae	Streptococcus		0.333333	10.25	11	0.6	0.6
4448724	Firmicutes	Clostridia	Clostridiales	Clostridiaceae	Clostridium		0	0	0.2	150.4	164
4449894	Firmicutes	Clostridia	Clostridiales	Ruminococcaceae			0	0	0	8.8	6.6
4449897	Firmicutes	Clostridia	Clostridiales				0	0	0	5	5
4450291	Firmicutes	Clostridia	Clostridiales	Ruminococcaceae			0	0	0	3.8	5.4
4452764	Firmicutes	Clostridia	Clostridiales				14.3333	0	0.2	0.8	0
4453921	Spirochaetes	Spirochaetes	Spirochaetales	Spirochaetaceae	Treponema		13.3333	0	0	0	0
4454737	Firmicutes	Bacilli	Bacillales				0.666667	3.75	8.8	0.6	0.6
4463569	Firmicutes	Clostridia	Clostridiales	Ruminococcaceae			0	0	0	7	5.8
4463575	Firmicutes	Clostridia	Clostridiales	Ruminococcaceae			0	0	0	3.4	3.6
4464173	Firmicutes	Clostridia	Clostridiales				0	0	0	3.6	3
4464961	Verrucomicrobia	Verrucomicrobiae	Verrucomicrobiales	Verrucomicrobiaceae	Akkermansia		0	0	0	46.6	38.4
4464969	Firmicutes	Clostridia	Clostridiales	Ruminococcaceae			0.333333	0.25	0.4	26.2	27.6
4465124	Firmicutes	Clostridia	Clostridiales				0	0	0	17.2	17.4
4466705	Firmicutes	Clostridia	Clostridiales				1.33333	7.5	4.6	20.6	19.4
4467491	Firmicutes	Clostridia	Clostridiales	Ruminococcaceae			0	0	0	19.2	19.6
4468394	Bacteroidetes	Bacteroidia	Bacteroidales				1	0	0	0	0
4468739	Firmicutes	Clostridia	Clostridiales	Clostridiaceae	Clostridium		0	0	0	6.6	3.4
4470216	Bacteroidetes	Bacteroidia	Bacteroidales				1.33333	0	0	0	0
4473788	Firmicutes	Clostridia	Clostridiales	Lachnospiraceae			0	0	0	15	12.8
4476773	Firmicutes	Clostridia	Clostridiales				8	0	0	11.6	12.4
4476780	Bacteroidetes	Bacteroidia	Bacteroidales	Rikenellaceae			0	0	0	14.8	21.8
4477796	Firmicutes	Clostridia	Clostridiales	Ruminococcaceae			0	0	0	34.2	28.6
4478502	Firmicutes	Clostridia	Clostridiales				1.33333	12.75	7.8	1.4	1.2
4481084	Firmicutes	Clostridia	Clostridiales	[Mogibacteriaceae]			0.666667	132.75	128.2	29.6	12.2
4482905	Firmicutes	Clostridia	Clostridiales	Lachnospiraceae	Butyrivibrio		4.33333	0.5	0	0	0.2
4483990	Bacteroidetes	Bacteroidia	Bacteroidales				0	0	0	19	27.2
New.CleanUp.ReferenceOTU0	Bacteroidetes	Bacteroidia	Bacteroidales	[Barnesiellaceae]			0	0	0.6	31.4	38
New.CleanUp.ReferenceOTU1038	Firmicutes	Clostridia	Clostridiales	Lachnospiraceae			0	1	2	0.2	0
New.CleanUp.ReferenceOTU1064	Firmicutes	Clostridia	Clostridiales	Ruminococcaceae			0	0	0	1.4	2.6
New.CleanUp.ReferenceOTU111	Firmicutes	Clostridia	Clostridiales	[Mogibacteriaceae]			0	4.75	9.8	2.2	0.6
New.CleanUp.ReferenceOTU117	Actinobacteria	Coriobacteriia	Coriobacteriales	Coriobacteriaceae			0	5.5	4.8	0.4	0.6
New.CleanUp.ReferenceOTU1198	Firmicutes	Clostridia	Clostridiales	Lachnospiraceae	Butyrivibrio		0	2.75	1.4	0.2	0.4
New.CleanUp.ReferenceOTU1225	Firmicutes	Clostridia	Clostridiales	Lachnospiraceae			0	2.25	2	0.2	0
New.CleanUp.ReferenceOTU127	Bacteroidetes	Bacteroidia	Bacteroidales	Prevotellaceae	Prevotella		3	0	0	0	0
New.CleanUp.ReferenceOTU1453	Firmicutes	Clostridia	Clostridiales				5	0.25	0	0	0
New.CleanUp.ReferenceOTU15	Bacteroidetes	Bacteroidia	Bacteroidales	S24-7			0	0	0	19.8	18.4
New.CleanUp.ReferenceOTU1593	Tenericutes	Mollicutes	RF39				0	0	0	3.4	1.6
New.CleanUp.ReferenceOTU1708	Actinobacteria	Coriobacteriia	Coriobacteriales	Coriobacteriaceae			0	1	2.2	0	0.2
New.CleanUp.ReferenceOTU182	Firmicutes	Clostridia	Clostridiales	Ruminococcaceae			5.66667	2.5	0.6	0	0
New.CleanUp.ReferenceOTU191	Spirochaetes	Spirochaetes	Spirochaetales	Spirochaetaceae	Treponema		2	0	0	0	0
New.CleanUp.ReferenceOTU202	Bacteroidetes	Bacteroidia	Bacteroidales				0	0	0	5.8	14.2
New.CleanUp.ReferenceOTU211	Firmicutes	Clostridia	Clostridiales	Lachnospiraceae			0	5	4	0.4	0
New.CleanUp.ReferenceOTU238	Bacteroidetes	Bacteroidia	Bacteroidales	Prevotellaceae	Prevotella		5.33333	0	0.4	0	0
New.CleanUp.ReferenceOTU246	Firmicutes	Clostridia	Clostridiales	Lachnospiraceae			0	3.25	1.4	0	0
New.CleanUp.ReferenceOTU247	Tenericutes	Mollicutes	RF39				0	0	0	6	4.4
New.CleanUp.ReferenceOTU265	Firmicutes	Erysipelotrichi	Erysipelotrichales	Erysipelotrichaceae	RFN20		2	0	0	0	0
New.CleanUp.ReferenceOTU27	Chloroflexi	Anaerolineae	Anaerolineales	Anaerolinaceae	SHD-231		0	7.5	6.4	1	1
New.CleanUp.ReferenceOTU282	Bacteroidetes	Bacteroidia	Bacteroidales	Prevotellaceae	Prevotella		2.66667	0	0.2	0	0
New.CleanUp.ReferenceOTU290	Bacteroidetes	Bacteroidia	Bacteroidales				0	0	0	1.4	4
New.CleanUp.ReferenceOTU3	Spirochaetes	Spirochaetes	Spirochaetales	Spirochaetaceae	Treponema		59.3333	0	0	0	0
New.CleanUp.ReferenceOTU302	Tenericutes	Mollicutes	Anaeroplasmatales	Anaeroplasmataceae	Anaeroplasma		2	0	0	0	0
New.CleanUp.ReferenceOTU317	Firmicutes	Clostridia	Clostridiales	Ruminococcaceae			0	0	0	7.8	10.2
New.CleanUp.ReferenceOTU396	Firmicutes	Clostridia	Clostridiales	Ruminococcaceae			0	0	0	4	3.4
New.CleanUp.ReferenceOTU437	Spirochaetes	Spirochaetes	Spirochaetales	Spirochaetaceae	Treponema		0	0	0	3.4	7.4
New.CleanUp.ReferenceOTU452	Firmicutes	Clostridia	Clostridiales	Lachnospiraceae	Butyrivibrio		0	0	3.2	0	0
New.CleanUp.ReferenceOTU484	Firmicutes	Clostridia	Clostridiales	Ruminococcaceae			0	0	0	2.6	3
New.CleanUp.ReferenceOTU49	Firmicutes	Clostridia	Clostridiales				0	1.25	3.4	0.2	0
New.CleanUp.ReferenceOTU491	Actinobacteria	Coriobacteriia	Coriobacteriales	Coriobacteriaceae			0	1.75	3.2	0.2	0
New.CleanUp.ReferenceOTU5	Firmicutes	Clostridia	Clostridiales	Lachnospiraceae			8	0	0	0	0
New.CleanUp.ReferenceOTU522	Firmicutes	Clostridia	Clostridiales	Lachnospiraceae			0	2.75	2.6	0	0
New.CleanUp.ReferenceOTU524	Firmicutes	Clostridia	Clostridiales				2	0	0	0	0
New.CleanUp.ReferenceOTU569	Firmicutes	Clostridia	Clostridiales	[Mogibacteriaceae]			0	6.75	1.6	0.6	0.6
New.CleanUp.ReferenceOTU61	Bacteroidetes	Bacteroidia	Bacteroidales				32.6667	0	0.4	0	0
New.CleanUp.ReferenceOTU619	Firmicutes	Clostridia	Clostridiales	Ruminococcaceae			0	0	0	3.2	4.4
New.CleanUp.ReferenceOTU623	Firmicutes	Clostridia	Clostridiales	Ruminococcaceae			0	0	0	5.2	2.6
New.CleanUp.ReferenceOTU628	Bacteroidetes	Bacteroidia	Bacteroidales				0	0	0	2	3.6
New.CleanUp.ReferenceOTU63	Firmicutes	Clostridia	Clostridiales	Ruminococcaceae	Ruminococcus		0	1.75	3	0	0
New.CleanUp.ReferenceOTU655	Firmicutes	Clostridia	Clostridiales	Lachnospiraceae			0	2	2.4	0	0
New.CleanUp.ReferenceOTU685	Firmicutes	Clostridia	Clostridiales	Ruminococcaceae			0	0	0	2.6	3.4
New.CleanUp.ReferenceOTU73	Firmicutes	Clostridia	Clostridiales	Lachnospiraceae			0	5	5	0.8	0
New.CleanUp.ReferenceOTU733	Firmicutes	Clostridia	Clostridiales	Ruminococcaceae	Ruminococcus		0	2.25	1	0.2	0
New.CleanUp.ReferenceOTU756	Firmicutes	Clostridia	Clostridiales	[Mogibacteriaceae]	Anaerovorax		0	0	0	2.8	4
New.CleanUp.ReferenceOTU80	Bacteroidetes	Bacteroidia	Bacteroidales	Prevotellaceae	Prevotella		1.33333	0	0	0	0
New.CleanUp.ReferenceOTU827	Firmicutes	Clostridia	Clostridiales	Ruminococcaceae			0	0	0	2	2.2
New.CleanUp.ReferenceOTU828	Bacteroidetes	Bacteroidia	Bacteroidales	Bacteroidaceae			0	0	0	3.8	2.2
New.CleanUp.ReferenceOTU854	Firmicutes	Clostridia	Clostridiales	Peptococcaceae	rc4-4		0	0	0	7	8
New.CleanUp.ReferenceOTU895	Firmicutes	Clostridia	Clostridiales				1	0	0	0	0
New.CleanUp.ReferenceOTU922	Firmicutes	Clostridia	Clostridiales	Christensenellaceae			0	0	0	2.2	2.4
New.ReferenceOTU0	SR1						9.33333	0	0	0	0
New.ReferenceOTU102	Firmicutes	Clostridia	Clostridiales	Ruminococcaceae			7	0.25	0.6	0	0
New.ReferenceOTU103	Verrucomicrobia	Verruco-5	WCHB1-41	RFP12			6.33333	0.25	0	0.2	0
New.ReferenceOTU107	Firmicutes	Clostridia	Clostridiales				4.33333	0.25	0.2	0	0
New.ReferenceOTU11	Bacteroidetes	Bacteroidia	Bacteroidales	Prevotellaceae	Prevotella		5.66667	0.25	0	0	0
New.ReferenceOTU114	Bacteroidetes	Bacteroidia	Bacteroidales	[Paraprevotellaceae]	CF231		0	0	0	18	20.4
New.ReferenceOTU122	SR1						7.66667	0	0.2	0	0
New.ReferenceOTU123	Bacteroidetes	Bacteroidia	Bacteroidales				13	0	0	0	0
New.ReferenceOTU124	Actinobacteria	Coriobacteriia	Coriobacteriales	Coriobacteriaceae			0	11.75	23	3.6	2.4
New.ReferenceOTU127	Firmicutes	Erysipelotrichi	Erysipelotrichales	Erysipelotrichaceae	Bulleidia		3.66667	14.5	25.4	3.4	1.4
New.ReferenceOTU131	Bacteroidetes	Bacteroidia	Bacteroidales	Prevotellaceae	Prevotella		14.3333	0	0.4	0	0
New.ReferenceOTU136	Tenericutes	RF3	ML615J-28				1.66667	0	0	0	0
New.ReferenceOTU148	Spirochaetes	Spirochaetes	Spirochaetales	Spirochaetaceae	Treponema		13	0	0	0	0
New.ReferenceOTU157	Bacteroidetes	Bacteroidia	Bacteroidales	[Paraprevotellaceae]	CF231		0	0	0	3.2	4.2
New.ReferenceOTU16	Synergistetes	Synergistia	Synergistales	Dethiosulfovibrionaceae	TG5		17	1.75	1.4	0.4	0.6
New.ReferenceOTU161	Chloroflexi	Anaerolineae	Anaerolineales	Anaerolinaceae	SHD-231		0	41	27.4	7	7.2
New.ReferenceOTU162	Bacteroidetes	Bacteroidia	Bacteroidales				4.66667	0	0	0	0
New.ReferenceOTU165	Bacteroidetes	Bacteroidia	Bacteroidales	S24-7			3	0	0	0	0
New.ReferenceOTU171	Bacteroidetes	Bacteroidia	Bacteroidales	Prevotellaceae	Prevotella		26	0	0	0	0
New.ReferenceOTU177	Firmicutes	Clostridia	Clostridiales	Lachnospiraceae			82.6667	0.5	0.2	0	0
New.ReferenceOTU180	Verrucomicrobia	Verruco-5	WCHB1-41				1.33333	0	0	0	0
New.ReferenceOTU186	Actinobacteria	Coriobacteriia	Coriobacteriales	Coriobacteriaceae			0	19.5	20.4	4.6	1.6
New.ReferenceOTU187	Bacteroidetes	Bacteroidia	Bacteroidales	BS11			3.66667	0	0	0	0
New.ReferenceOTU188	Proteobacteria	Deltaproteobacteria	Desulfovibrionales	Desulfovibrionaceae	Desulfovibrio		5.66667	0	0	0	0.2
New.ReferenceOTU196	Firmicutes	Clostridia	Clostridiales	Ruminococcaceae			3.66667	0	0	0	0
New.ReferenceOTU200	Firmicutes	Clostridia	Clostridiales	Lachnospiraceae			4.33333	0	0.2	0	0
New.ReferenceOTU202	Bacteroidetes	Bacteroidia	Bacteroidales				1.66667	0	0	0	0
New.ReferenceOTU208	Proteobacteria	Deltaproteobacteria	Desulfovibrionales	Desulfovibrionaceae	Desulfovibrio		1.66667	0	0	0	0
New.ReferenceOTU218	Firmicutes	Clostridia	Clostridiales	Lachnospiraceae			0	18.75	13	1.6	0.6
New.ReferenceOTU221	Firmicutes	Clostridia	Clostridiales	Lachnospiraceae			15	0	0.2	0	0
New.ReferenceOTU235	Actinobacteria	Coriobacteriia	Coriobacteriales	Coriobacteriaceae			0	19.25	21.8	5.2	4.2
New.ReferenceOTU236	Actinobacteria	Coriobacteriia	Coriobacteriales	Coriobacteriaceae			0.333333	4	5.8	1.4	0
New.ReferenceOTU24	Chloroflexi	Anaerolineae	Anaerolineales	Anaerolinaceae	SHD-231		0.333333	31	23.4	6	3
New.ReferenceOTU28	Synergistetes	Synergistia	Synergistales	Dethiosulfovibrionaceae	TG5		31.6667	3	2	0.2	0
New.ReferenceOTU290	Spirochaetes	Spirochaetes	Spirochaetales	Spirochaetaceae	Treponema		11	0	0	0	0
New.ReferenceOTU300	Bacteroidetes	Bacteroidia	Bacteroidales	[Paraprevotellaceae]	CF231		7	0	0	0	0
New.ReferenceOTU309	Bacteroidetes	Bacteroidia	Bacteroidales	Prevotellaceae	Prevotella		7.66667	0	0	0	0
New.ReferenceOTU313	Bacteroidetes	Bacteroidia	Bacteroidales				13.6667	0	0	0	0
New.ReferenceOTU32	Bacteroidetes	Bacteroidia	Bacteroidales	[Paraprevotellaceae]			4	0.5	0	0.4	0
New.ReferenceOTU327	Bacteroidetes	Bacteroidia	Bacteroidales	Prevotellaceae	Prevotella		1	0	0	0	0
New.ReferenceOTU34	Bacteroidetes	Bacteroidia	Bacteroidales	[Paraprevotellaceae]			3.33333	0	0	0	0
New.ReferenceOTU35	Bacteroidetes	Bacteroidia	Bacteroidales	Prevotellaceae	Prevotella		27	0	0	0	0
New.ReferenceOTU362	Bacteroidetes	Bacteroidia	Bacteroidales	[Paraprevotellaceae]	CF231		1.33333	0	0	0	0
New.ReferenceOTU374	Firmicutes	Clostridia	Clostridiales				0	0	0	5.2	2.4
New.ReferenceOTU387	Actinobacteria	Coriobacteriia	Coriobacteriales	Coriobacteriaceae			0.666667	10.25	12.6	3.2	2.6
New.ReferenceOTU390	Tenericutes	Mollicutes	Mycoplasmatales	Mycoplasmataceae			1	0	0	0	0
New.ReferenceOTU391	Firmicutes	Clostridia	Clostridiales	Ruminococcaceae			0	0	0	4.2	4.6
New.ReferenceOTU392	Spirochaetes	Spirochaetes	Spirochaetales	Spirochaetaceae	Treponema		0	0	0	2.4	112.8
New.ReferenceOTU394	Verrucomicrobia	Verrucomicrobiae	Verrucomicrobiales	Verrucomicrobiaceae	Akkermansia		0	0	0	2.8	2.2
New.ReferenceOTU43	Verrucomicrobia	Verrucomicrobiae	Verrucomicrobiales	Verrucomicrobiaceae	Akkermansia		0	0	0.4	30.2	22.8
New.ReferenceOTU435	Bacteroidetes	Bacteroidia	Bacteroidales	Prevotellaceae	Prevotella		4.33333	0	0	0	0
New.ReferenceOTU440	Planctomycetes	Planctomycetia	Pirellulales	Pirellulaceae			0	0	0	18.4	17.2
New.ReferenceOTU460	Tenericutes	Mollicutes	Anaeroplasmatales	Anaeroplasmataceae	Anaeroplasma		15.6667	0	0	0	0
New.ReferenceOTU468	Actinobacteria	Coriobacteriia	Coriobacteriales	Coriobacteriaceae			0	1.75	0.8	0.4	0
New.ReferenceOTU470	Bacteroidetes	Bacteroidia	Bacteroidales	[Paraprevotellaceae]			6	0	0	0	0
New.ReferenceOTU480	Verrucomicrobia	Verruco-5	WCHB1-41	RFP12			0	0	0	3.8	5
New.ReferenceOTU489	Tenericutes	Mollicutes	Anaeroplasmatales	Anaeroplasmataceae			3.66667	0	0	0	0
New.ReferenceOTU491	Bacteroidetes	Bacteroidia	Bacteroidales	Bacteroidaceae			0	0	0	4.8	5.4
New.ReferenceOTU5	Bacteroidetes	Bacteroidia	Bacteroidales	[Paraprevotellaceae]			5	0	0	0	0
New.ReferenceOTU50	Firmicutes	Clostridia	Clostridiales	Ruminococcaceae			28.3333	1	0.6	0	0
New.ReferenceOTU503	Firmicutes	Clostridia	Clostridiales	Ruminococcaceae			18	3	1.6	0	0
New.ReferenceOTU524	Bacteroidetes	Bacteroidia	Bacteroidales	Rikenellaceae			0	0	0	6	9.2
New.ReferenceOTU53	Actinobacteria	Coriobacteriia	Coriobacteriales	Coriobacteriaceae			1	169.75	177.4	26.8	17
New.ReferenceOTU543	Tenericutes	Mollicutes	RF39				0.333333	0	0	3	3
New.ReferenceOTU55	Bacteroidetes	Bacteroidia	Bacteroidales				13.3333	0	0	0	0
New.ReferenceOTU574	Spirochaetes	Spirochaetes	Spirochaetales	Spirochaetaceae	Treponema		1.66667	0	0	0	0
New.ReferenceOTU592	Bacteroidetes	Bacteroidia	Bacteroidales	Prevotellaceae	Prevotella		5.66667	0	0	0	0
New.ReferenceOTU60	Bacteroidetes	Bacteroidia	Bacteroidales				6.66667	0.25	0.6	0	0
New.ReferenceOTU600	Firmicutes	Clostridia	Clostridiales				0	5.5	6.8	1.2	0.4
New.ReferenceOTU606	Firmicutes	Clostridia	Clostridiales				0.333333	9.75	4.4	1	0.2
New.ReferenceOTU617	Fibrobacteres	Fibrobacteria	Fibrobacterales	Fibrobacteraceae	Fibrobacter	succinogenes	2.33333	0	0	0	0
New.ReferenceOTU635	Bacteroidetes	Bacteroidia	Bacteroidales	Prevotellaceae	Prevotella		2	0.25	0	0	0
New.ReferenceOTU649	Tenericutes	Mollicutes	Anaeroplasmatales	Anaeroplasmataceae	Anaeroplasma		3	0	0	0	0
New.ReferenceOTU659	Tenericutes	Mollicutes	Anaeroplasmatales	Anaeroplasmataceae	Anaeroplasma		7.33333	0	0	0	0
New.ReferenceOTU674	Bacteroidetes	Bacteroidia	Bacteroidales	S24-7			0	0	0	5.4	8.2
New.ReferenceOTU679	Firmicutes	Clostridia	Clostridiales	Ruminococcaceae			0	0	0	4.8	4.4
New.ReferenceOTU687	Firmicutes	Clostridia	Clostridiales				0.333333	10.5	5	0.4	0
New.ReferenceOTU694	Firmicutes	Clostridia	Clostridiales				0.666667	13.75	10.4	1	0.4
New.ReferenceOTU711	Firmicutes	Clostridia	Clostridiales	Lachnospiraceae			0.333333	3	3.4	0.4	0
New.ReferenceOTU717	Firmicutes	Clostridia	Clostridiales	Lachnospiraceae			0	6.25	5.2	0.6	0.8
New.ReferenceOTU721	Firmicutes	Clostridia	Clostridiales	[Mogibacteriaceae]			0	9.5	8.6	2.2	0.6
New.ReferenceOTU731	Firmicutes	Clostridia	Clostridiales	Christensenellaceae			0	0	0	1.6	4
New.ReferenceOTU75	Bacteroidetes	Bacteroidia	Bacteroidales	[Paraprevotellaceae]	CF231		3.33333	0	0	0	0
New.ReferenceOTU750	Firmicutes	Clostridia	Clostridiales				0.666667	18.5	15	1.4	0.8
New.ReferenceOTU80	Bacteroidetes	Bacteroidia	Bacteroidales	Prevotellaceae	Prevotella		3.66667	0	0	0	0.2
New.ReferenceOTU83	Synergistetes	Synergistia	Synergistales	Dethiosulfovibrionaceae	TG5		4.66667	0.5	1	0	0
New.ReferenceOTU9	Proteobacteria	Deltaproteobacteria	Desulfovibrionales	Desulfovibrionaceae	Desulfovibrio		21	0	0.2	1.2	1
New.ReferenceOTU91	Bacteroidetes	Bacteroidia	Bacteroidales	p-2534-18B5			0	0	0	25	32.8
New.ReferenceOTU97	Firmicutes	Clostridia	Clostridiales				2	8.25	3.8	1.2	1
