# Supplementary material for: Bacterial Communities in the Alpaca Gastrointestinal Tract Vary With Diet and Body Site
Source: Front Microbiol. 2019 Jan 18;9:3334. doi: 10.3389/fmicb.2018.03334 (PMC6345687; doi:10.3389/fmicb.2018.03334)
Supplement: Supplementary file 16 [file Data_Sheet_4.xlsx]

## Sheet: Datasheet S4
Data Sheet S4. Taxa that are differentially abundant with diet. A. Summary statistics for the effect of diet on the microbiota of different alpaca body sites (statistics calculated separately for each body site). % reads and % of taxa represents the percentages of reads and taxa, respectively, that were differentially abundant with body site in each group of alpacas. B-C. List of OTU IDs, Phylum …
A
	% of reads	% of taxa
C1	0.0734766	0.00792719
Jejunum	0.014405	0.00906892
Ileum	0.0976127	0.0135203
Cecum	0.034591	0.00454821
Large intestine	0.0253255	0.00338566
B
OTU	Phylum	Class	Order	Family	Genus	Species	GH	AH	% difference
209606	Bacteroidetes	Bacteroidia	Bacteroidales	Bacteroidaceae	BF311		38.8	0	1
628517	Lentisphaerae	[Lentisphaeria]	Victivallales	Victivallaceae			30.8	0	1
85799	Bacteroidetes	Bacteroidia	Bacteroidales	Prevotellaceae	Prevotella		28.4	0	1
214336	Bacteroidetes	Bacteroidia	Bacteroidales	Prevotellaceae	Prevotella		21.4	0	1
254969	Bacteroidetes	Bacteroidia	Bacteroidales				19.2	0	1
2127	Bacteroidetes	Bacteroidia	Bacteroidales	Prevotellaceae	Prevotella		10.4	0	1
269309	Bacteroidetes	Bacteroidia	Bacteroidales	Bacteroidaceae	BF311		23.8	0.333333	0.986188
310432	Bacteroidetes	Bacteroidia	Bacteroidales	[Paraprevotellaceae]	YRC22		22.4	0.333333	0.985337
318637	Bacteroidetes	Bacteroidia	Bacteroidales	Prevotellaceae	Prevotella		40.4	0.666667	0.983766
259033	Bacteroidetes	Bacteroidia	Bacteroidales	Prevotellaceae	Prevotella		39.4	0.666667	0.983361
102084	Bacteroidetes	Bacteroidia	Bacteroidales	Prevotellaceae	Prevotella		17	0.333333	0.980769
262032	Fibrobacteres	Fibrobacteria	Fibrobacterales	Fibrobacteraceae	Fibrobacter	succinogenes	104	7	0.936937
265978	Bacteroidetes	Bacteroidia	Bacteroidales	Prevotellaceae	Prevotella		0.4	25.3333	0.015544
84270	Bacteroidetes	Bacteroidia	Bacteroidales	Prevotellaceae	Prevotella		1.2	149	0.00798935
550201	Spirochaetes	Spirochaetes	Spirochaetales	Spirochaetaceae	Treponema		0.4	53	0.00749064
New.ReferenceOTU503	Firmicutes	Clostridia	Clostridiales	Ruminococcaceae			0	18	0
New.ReferenceOTU452	Firmicutes	Clostridia	Clostridiales	Ruminococcaceae			0	13	0
New.ReferenceOTU309	Bacteroidetes	Bacteroidia	Bacteroidales	Prevotellaceae	Prevotella		0	7.66667	0
New.ReferenceOTU177	Firmicutes	Clostridia	Clostridiales	Lachnospiraceae			0	82.6667	0
New.ReferenceOTU171	Bacteroidetes	Bacteroidia	Bacteroidales	Prevotellaceae	Prevotella		0	26	0
4304085	Firmicutes	Clostridia	Clostridiales	Ruminococcaceae			0	6.66667	0
634450	Firmicutes	Clostridia	Clostridiales	Ruminococcaceae			0	8.66667	0
338758	Bacteroidetes	Bacteroidia	Bacteroidales	Prevotellaceae	Prevotella		0	26	0
263905	Bacteroidetes	Bacteroidia	Bacteroidales	Prevotellaceae	Prevotella		0	21.3333	0
250378	Firmicutes	Clostridia	Clostridiales	Lachnospiraceae			0	7	0
102929	Bacteroidetes	Bacteroidia	Bacteroidales	Prevotellaceae	Prevotella		0	20.6667	0
101860	Firmicutes	Clostridia	Clostridiales	Lachnospiraceae	Lachnospira		0	36	0
C
OTU	Phylum	Class	Order	Family	Genus	Species	GH	AH	% difference
310432	Bacteroidetes	Bacteroidia	Bacteroidales	[Paraprevotellaceae]	YRC22		15.3333	0	1
319450	Firmicutes	Clostridia	Clostridiales	Ruminococcaceae			8.66667	0	1
325281	Tenericutes	Mollicutes	RF39				10	0	1
346003	Firmicutes	Clostridia	Clostridiales				31.3333	0	1
352691	Tenericutes	Mollicutes	RF39				10	0	1
2883968	Firmicutes	Clostridia	Clostridiales				12.3333	0	1
4058515	Firmicutes	Clostridia	Clostridiales				12.6667	0	1
4304967	Bacteroidetes	Bacteroidia	Bacteroidales	Prevotellaceae	Prevotella		4	0	1
New.CleanUp.ReferenceOTU113	Actinobacteria	Coriobacteriia	Coriobacteriales	Coriobacteriaceae			8.66667	0	1
New.CleanUp.ReferenceOTU34	Actinobacteria	Coriobacteriia	Coriobacteriales	Coriobacteriaceae			16.3333	0	1
New.CleanUp.ReferenceOTU564	Actinobacteria	Coriobacteriia	Coriobacteriales	Coriobacteriaceae			6.66667	0	1
New.CleanUp.ReferenceOTU96	Actinobacteria	Coriobacteriia	Coriobacteriales	Coriobacteriaceae			14	0	1
New.ReferenceOTU209	Actinobacteria	Coriobacteriia	Coriobacteriales	Coriobacteriaceae			7	0	1
New.ReferenceOTU379	Actinobacteria	Coriobacteriia	Coriobacteriales	Coriobacteriaceae			19.6667	0	1
318599	Firmicutes	Clostridia	Clostridiales	Lachnospiraceae			21.3333	2.5	0.895105
D
OTU	Phylum	Class	Order	Family	Genus	Species	GH	AH	% difference
New.ReferenceOTU61	Actinobacteria	Coriobacteriia	Coriobacteriales	Coriobacteriaceae	Adlercreutzia		47.8	0	1
New.ReferenceOTU379	Actinobacteria	Coriobacteriia	Coriobacteriales	Coriobacteriaceae			24.6	0	1
New.CleanUp.ReferenceOTU34	Actinobacteria	Coriobacteriia	Coriobacteriales	Coriobacteriaceae			28	0	1
New.CleanUp.ReferenceOTU113	Actinobacteria	Coriobacteriia	Coriobacteriales	Coriobacteriaceae			5	0	1
349892	Tenericutes	Mollicutes	RF39				6.6	0	1
346003	Firmicutes	Clostridia	Clostridiales				38.4	0	1
325281	Tenericutes	Mollicutes	RF39				8.8	0	1
313733	Tenericutes	Mollicutes	RF39				16.6	0	1
11376	Actinobacteria	Coriobacteriia	Coriobacteriales	Coriobacteriaceae			11.4	0	1
New.ReferenceOTU349	Actinobacteria	Coriobacteriia	Coriobacteriales	Coriobacteriaceae			13	0.2	0.984848
105434	Firmicutes	Clostridia	Clostridiales				39.2	1.4	0.965517
New.ReferenceOTU388	Actinobacteria	Coriobacteriia	Coriobacteriales	Coriobacteriaceae			11.8	0.8	0.936508
New.ReferenceOTU411	Actinobacteria	Coriobacteriia	Coriobacteriales	Coriobacteriaceae			23.2	1.6	0.935484
99332	Actinobacteria	Coriobacteriia	Coriobacteriales	Coriobacteriaceae			145	11.2	0.928297
3206495	Firmicutes	Clostridia	Clostridiales				29.8	2.4	0.925466
812218	Firmicutes	Clostridia	Clostridiales	Lachnospiraceae			4.4	0.4	0.916667
319450	Firmicutes	Clostridia	Clostridiales	Ruminococcaceae			12	1.2	0.909091
109933	Firmicutes	Clostridia	Clostridiales				138.8	18.4	0.882952
4430922	Tenericutes	Mollicutes	RF39				15.6	2.2	0.876404
320783	Firmicutes	Clostridia	Clostridiales	[Mogibacteriaceae]			42	7.2	0.853659
292851	Firmicutes	Clostridia	Clostridiales				13.2	88.2	0.130178
309161	Firmicutes	Clostridia	Clostridiales	Lachnospiraceae			1.8	13	0.121622
169738	Firmicutes	Clostridia	Clostridiales	Lachnospiraceae	Butyrivibrio		22.8	220	0.0939044
292128	Firmicutes	Clostridia	Clostridiales	[Mogibacteriaceae]	Mogibacterium		4.8	52.4	0.0839161
New.ReferenceOTU235	Actinobacteria	Coriobacteriia	Coriobacteriales	Coriobacteriaceae			0.2	21.8	0.00909091
New.ReferenceOTU452	Firmicutes	Clostridia	Clostridiales	Ruminococcaceae			0	9.2	0
New.ReferenceOTU218	Firmicutes	Clostridia	Clostridiales	Lachnospiraceae			0	13	0
E
OTU	Phylum	Class	Order	Family	Genus	Species	GH	AH	% difference
338226	Bacteroidetes	Bacteroidia	Bacteroidales	Bacteroidaceae	Bacteroides		45.4	0	1
3206495	Firmicutes	Clostridia	Clostridiales				5.4	0	1
New.ReferenceOTU61	Actinobacteria	Coriobacteriia	Coriobacteriales	Coriobacteriaceae	Adlercreutzia		10.4	0.2	0.981132
346761	Firmicutes	Clostridia	Clostridiales	Ruminococcaceae			30	0.6	0.980392
355249	Bacteroidetes	Bacteroidia	Bacteroidales	[Paraprevotellaceae]	Paraprevotella		13	0.4	0.970149
New.ReferenceOTU154	Bacteroidetes	Bacteroidia	Bacteroidales	[Paraprevotellaceae]	YRC22		60.4	2.4	0.961783
730733	Bacteroidetes	Bacteroidia	Bacteroidales	Rikenellaceae			12.4	0.6	0.953846
New.ReferenceOTU138	Bacteroidetes	Bacteroidia	Bacteroidales	Bacteroidaceae	BF311		85	4.6	0.948661
New.ReferenceOTU406	Bacteroidetes	Bacteroidia	Bacteroidales	Bacteroidaceae			27.2	2.2	0.92517
4435578	Firmicutes	Clostridia	Clostridiales	Dehalobacteriaceae			0.8	11.6	0.0645161
1103978	Firmicutes	Clostridia	Clostridiales	Lachnospiraceae			0.6	10.6	0.0535714
154576	Bacteroidetes	Bacteroidia	Bacteroidales				0.8	16.8	0.0454545
292851	Firmicutes	Clostridia	Clostridiales				0.6	17	0.0340909
169738	Firmicutes	Clostridia	Clostridiales	Lachnospiraceae	Butyrivibrio		1	45.6	0.0214592
4402751	Firmicutes	Clostridia	Clostridiales	Ruminococcaceae	Ruminococcus		0	8.8	0
F
OTU	Phylum	Class	Order	Family	Genus	Species	GH	AH	% difference
338226	Bacteroidetes	Bacteroidia	Bacteroidales	Bacteroidaceae	Bacteroides		51	0	1
99332	Actinobacteria	Coriobacteriia	Coriobacteriales	Coriobacteriaceae			8	0	1
730733	Bacteroidetes	Bacteroidia	Bacteroidales	Rikenellaceae			9	0.2	0.978261
New.ReferenceOTU138	Bacteroidetes	Bacteroidia	Bacteroidales	Bacteroidaceae	BF311		80.2	3	0.963942
New.ReferenceOTU154	Bacteroidetes	Bacteroidia	Bacteroidales	[Paraprevotellaceae]	YRC22		69.6	3.8	0.948229
154576	Bacteroidetes	Bacteroidia	Bacteroidales				1.4	15.2	0.0843373
169738	Firmicutes	Clostridia	Clostridiales	Lachnospiraceae	Butyrivibrio		0.8	19	0.040404
301678	Firmicutes	Clostridia	Clostridiales	Ruminococcaceae	Ruminococcus		0.2	9.4	0.0208333
New.CleanUp.ReferenceOTU202	Bacteroidetes	Bacteroidia	Bacteroidales				0	14.2	0
4402751	Firmicutes	Clostridia	Clostridiales	Ruminococcaceae	Ruminococcus		0	12	0
319521	Firmicutes	Clostridia	Clostridiales	Ruminococcaceae			0	6.4	0
